# Supplementary material
Source: PubMed Central journal article supplement (PMC6535519)
Supplement: AAC.00388-19-s0001.pdf [file AAC.00388-19-s0001.pdf]

# Treatment-shortening effect of a novel regimen combining high-dose rifapentine and clofazimine in pathologically distinct mouse models of tuberculosis

Vikram Saini, Nicole C. Ammerman, Yong Seok Chang, Rokeya Tasneen, Richard E. Chaisson, Sanjay Jain, Eric Nuermberger, Jacques H. Grosset

## Supplemental Materials

### FIGURES

- **Figure S1.** BALB/c mouse lungs dissected the day after infection (Week -2).
- **Figure S2.** BALB/c mouse lungs dissected on the day of treatment initiation (Day 0) and from untreated negative control mice euthanized 3 weeks after infection (1 week after Day 0).
- **Figure S3.** BALB/c mouse lungs dissected after 4 weeks of treatment.
- **Figure S4.** BALB/c mouse lungs dissected after 6 weeks of treatment.
- **Figure S5.** BALB/c mouse lungs dissected after 8 weeks of treatment.
- **Figure S6.** BALB/c mouse lungs dissected after 10 weeks of treatment.
- **Figure S7.** BALB/c mouse lungs dissected after 12 weeks of treatment.
- **Figure S8.** Approximate lung CFUs at relapse assessment for BALB/c and C3HeB/FeJ mice.
- **Figure S9.** C3HeB/FeJ mouse lungs dissected the day after infection (Week -6).
- **Figure S10.** C3HeB/FeJ mouse lungs dissected 3 weeks after infection (Week -3).
- **Figure S11.** C3HeB/FeJ mouse lungs dissected from mice that died after Week -3 but before treatment initiation on Day 0.
- **Figure S12.** C3HeB/FeJ mouse lungs dissected the day of treatment initiation (Day 0).
- **Figure S13.** C3HeB/FeJ mouse lungs dissected from untreated negative control mice.
- **Figure S14.** C3HeB/FeJ mouse lungs dissected after 4 weeks of treatment.
- **Figure S15.** C3HeB/FeJ mouse lungs dissected after 6 weeks of treatment.
- **Figure S16.** C3HeB/FeJ mouse lungs dissected after 8 weeks of treatment.
- **Figure S17.** C3HeB/FeJ mouse lungs dissected after 10 weeks of treatment.
- **Figure S18.** C3HeB/FeJ mouse lungs dissected after 12 weeks of treatment.
- **Figure S19.** Trough rifapentine and clofazimine serum levels and lung CFU counts for individual mice after 4 and 8 weeks of treatment.

### TABLES

- **Table S1.** CFU count data used to calculate the concentration of *M. tuberculosis* suspensions used for aerosol infections.
- **Table S2.** CFU count data used to calculate the number of *M. tuberculosis* implanted in mouse lungs during aerosol infection.
- **Table S3.** BALB/c lung CFU count data used to calculate CFU/lung at treatment initiation (Day 0) and for the untreated negative control mice.
- **Table S4.** BALB/c lung CFU count data used to calculate CFU/lung after 4 weeks of treatment.
- **Table S5.** BALB/c lung CFU count data used to calculate CFU/lung after 6 weeks of treatment.
- **Table S6.** BALB/c lung CFU count data used to calculate CFU/lung after 8 weeks of treatment.
- **Table S7.** BALB/c lung CFU count data used to calculate CFU/lung after 10 weeks of treatment.
- **Table S8.** BALB/c lung CFU count data used to calculate CFU/lung after 12 weeks of treatment.
- **Table S9.** Lung CFU data from BALB/c mice assessed for relapse after 6 weeks of treatment.
- **Table S10.** Lung CFU data from BALB/c mice assessed for relapse after 8 weeks of treatment.
- **Table S11.** Lung CFU data from BALB/c mice assessed for relapse after 10 weeks of treatment.
- **Table S12.** Lung CFU data from BALB/c mice assessed for relapse after 12 weeks of treatment.
- **Table S13.** C3HeB/FeJ lung CFU count data used to calculate CFU/lung 3 weeks after infection (Week -3) and on the day of treatment initiation (Day 0).

- **Table S14.** C3HeB/FeJ lung CFU count data used to calculate CFU/lung of mice that died after Week -3 but before Day 0 and of the untreated negative control mice.
- **Table S15.** C3HeB/FeJ lung CFU count data used to calculate CFU/lung after 4 weeks of treatment.
- **Table S16.** C3HeB/FeJ lung CFU count data used to calculate CFU/lung after 6 weeks of treatment.
- **Table S17.** C3HeB/FeJ lung CFU count data used to calculate CFU/lung after 8 weeks of treatment.
- **Table S18.** C3HeB/FeJ lung CFU count data used to calculate CFU/lung after 10 weeks of treatment.
- **Table S19.** C3HeB/FeJ lung CFU count data used to calculate CFU/lung after 12 weeks of treatment.
- **Table S20.** Lung CFU data from C3HeB/FeJ mice assessed for relapse after 6 weeks of treatment.
- **Table S21.** Lung CFU data from C3HeB/FeJ mice assessed for relapse after 8 weeks of treatment.
- **Table S22.** Lung CFU data from C3HeB/FeJ mice assessed for relapse after 10 weeks of treatment.
- **Table S23.** Lung CFU data from C3HeB/FeJ mice assessed for relapse after 12 weeks of treatment.
- **Table S24.** Trough clofazimine and rifapentine serum concentrations for individual mice after 4, 8, and 12 weeks of treatment with clofazimine- and rifapentine-containing regimens, respectively.
- **Table S25.** Relapse data of mice receiving the standard first-line regimen from six previous studies evaluating clofazimine and high-dose rifapentine in BALB/c mice.
- **Table S26.** Preparation of drug suspensions/solutions for oral administration to BALB/c and C3HeB/FeJ mice.

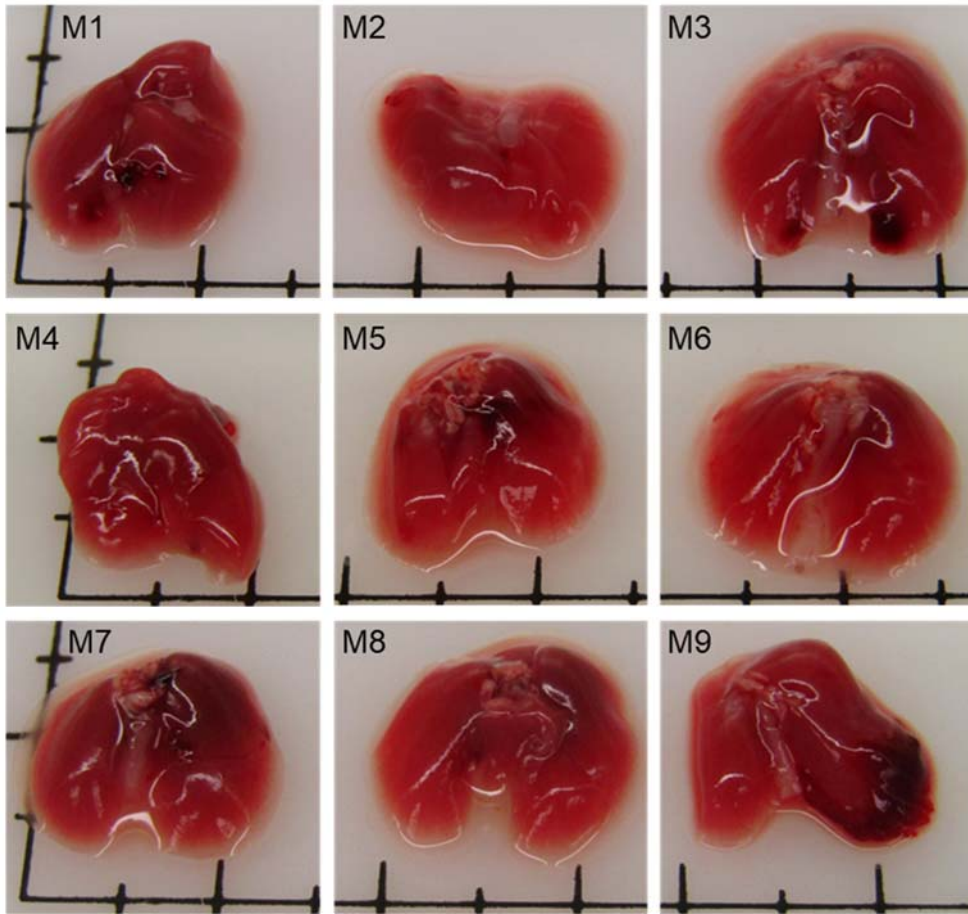

**Figure S1. BALB/c mouse lungs dissected the day after infection (Week -2).** CFU counts for each lung are presented in **Table S2**. Tick marks are every 5 mm (large tick marks are 1 cm apart).

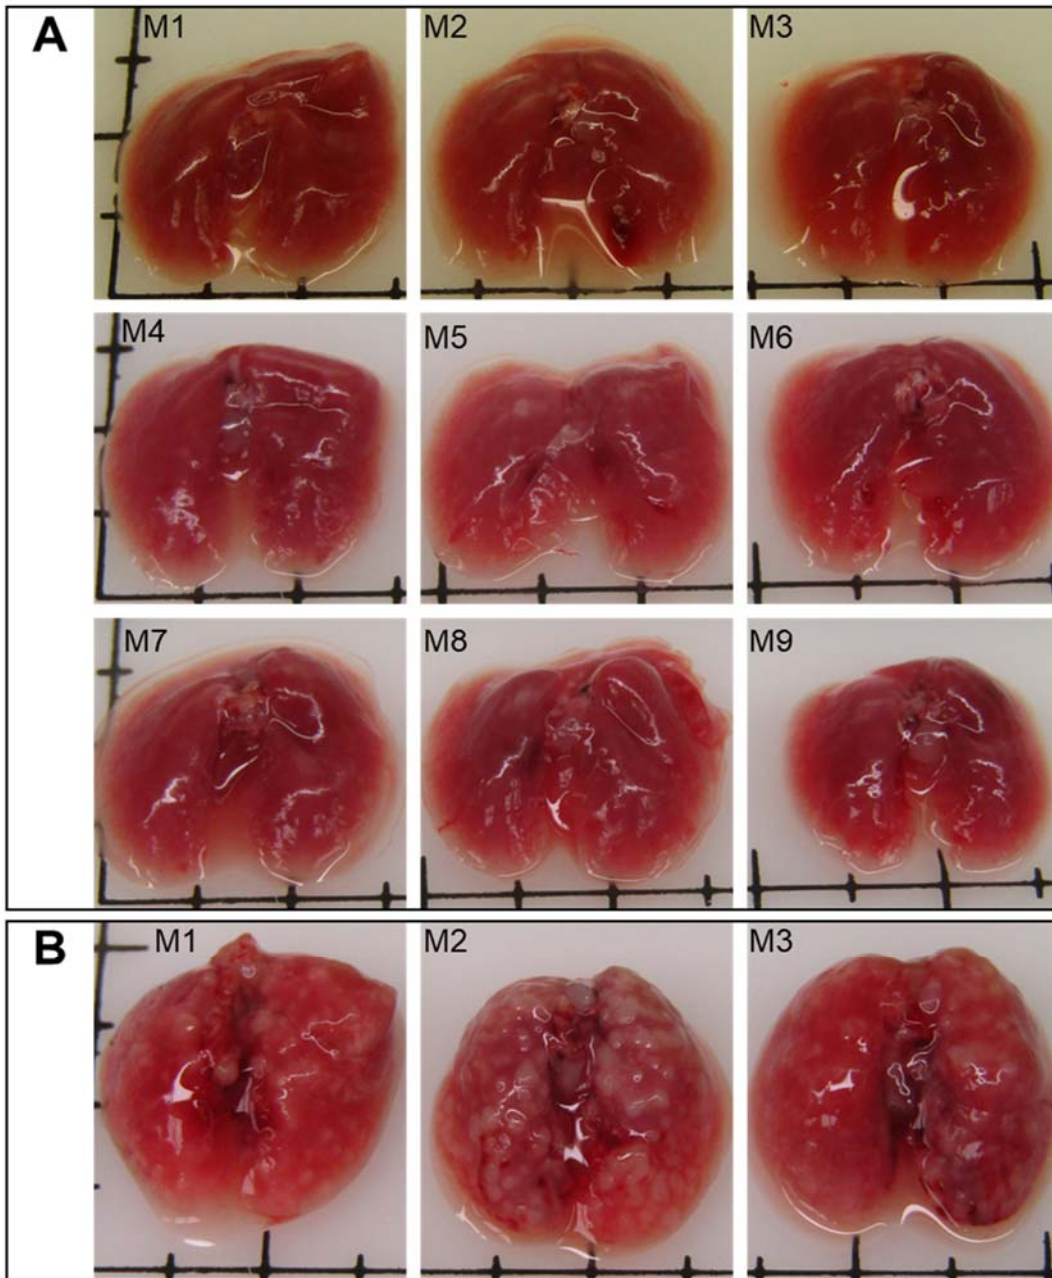

**Figure S2.** BALB/c mouse lungs dissected **A)** on the day of treatment initiation (**Day 0**) and **B)** from untreated negative control mice euthanized 3 weeks after infection (1 week after **Day 0**). CFU counts for each lung are presented in **Table S3**. Tick marks are every 5 mm (large tick marks are 1 cm apart).

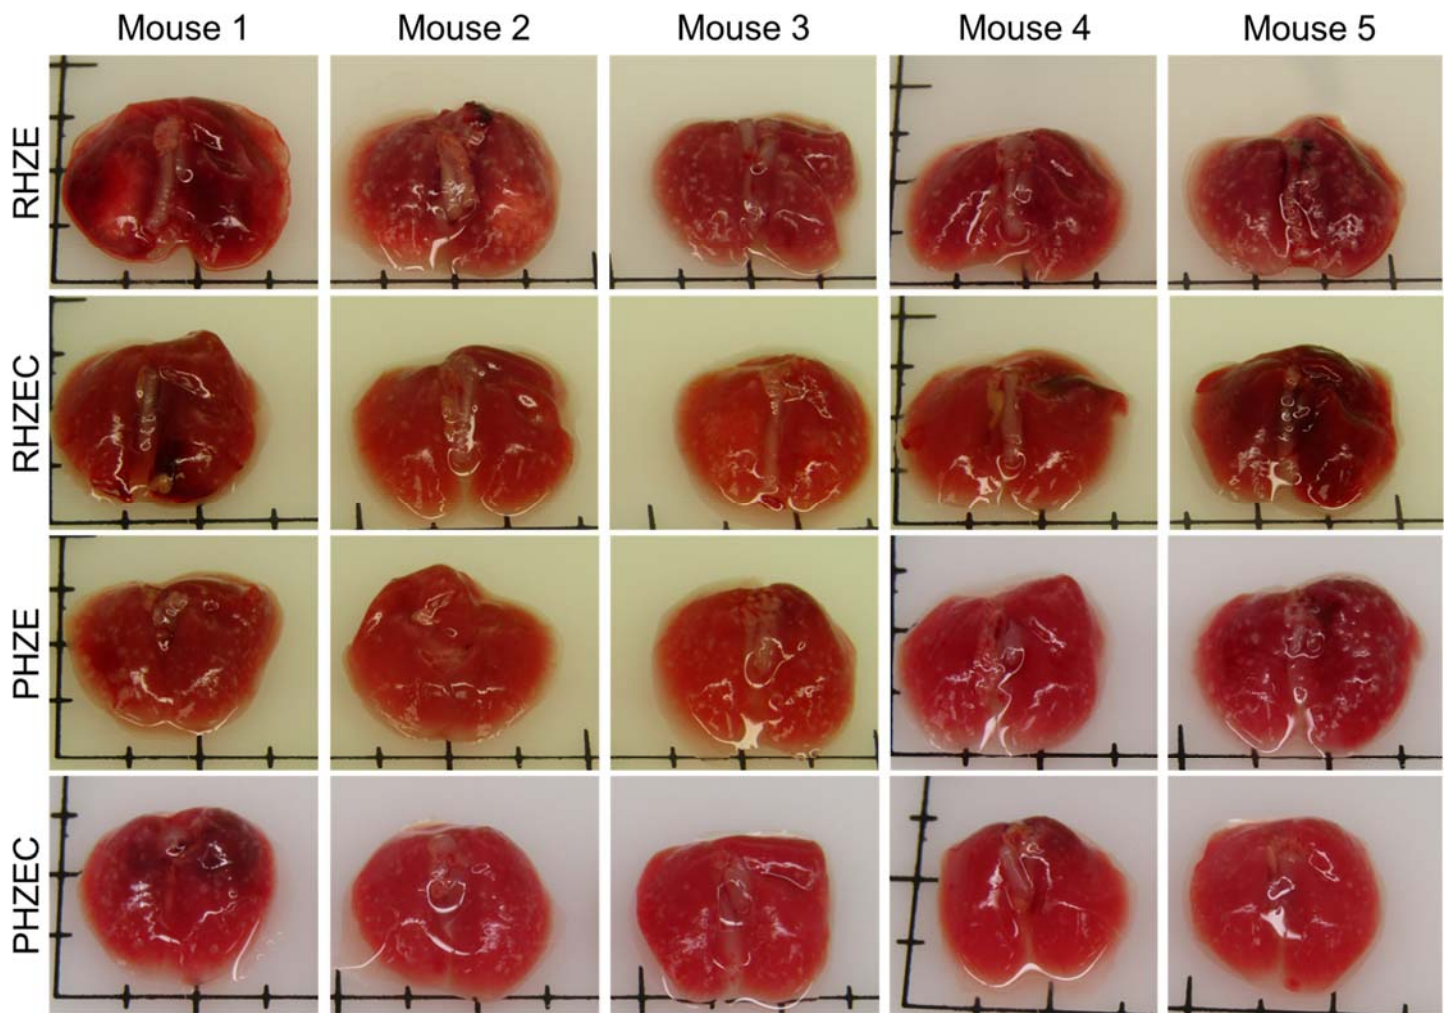

**Figure S3. BALB/c mouse lungs dissected after 4 weeks of treatment.** CFU counts for each lung are presented in **Table S4**. Tick marks are every 5 mm (large tick marks are 1 cm apart).

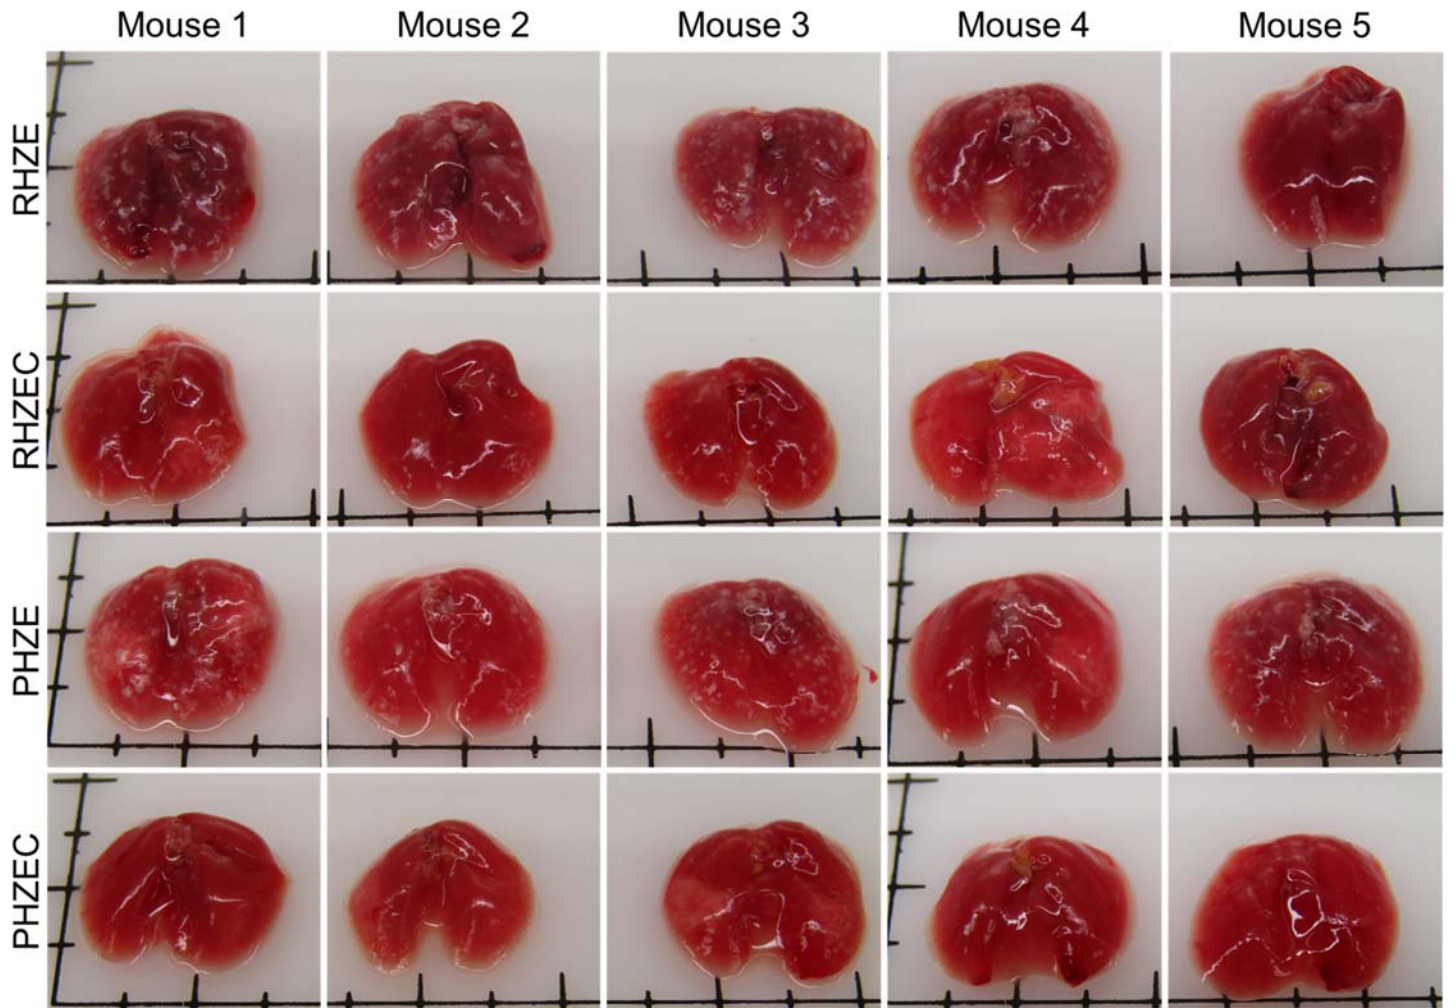

**Figure S4. BALB/c mouse lungs dissected after 6 weeks of treatment.** CFU counts for each lung are presented in **Table S5**. Tick marks are every 5 mm (large tick marks are 1 cm apart).

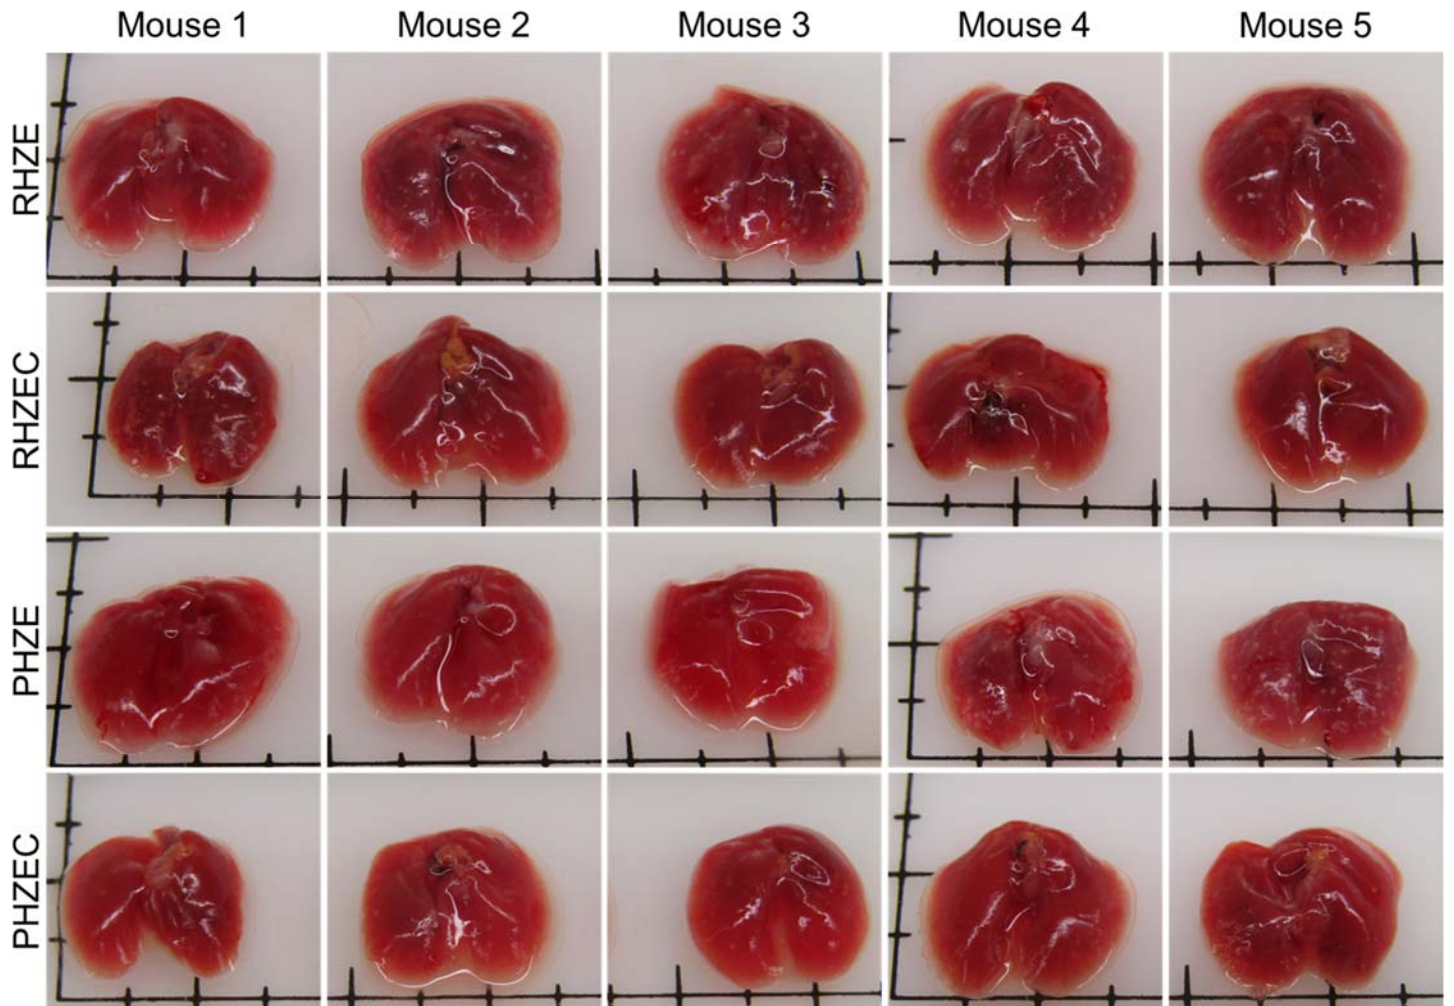

**Figure S5. BALB/c mouse lungs dissected after 8 weeks of treatment.** CFU counts for each lung are presented in **Table S6**. Tick marks are every 5 mm (large tick marks are 1 cm apart).

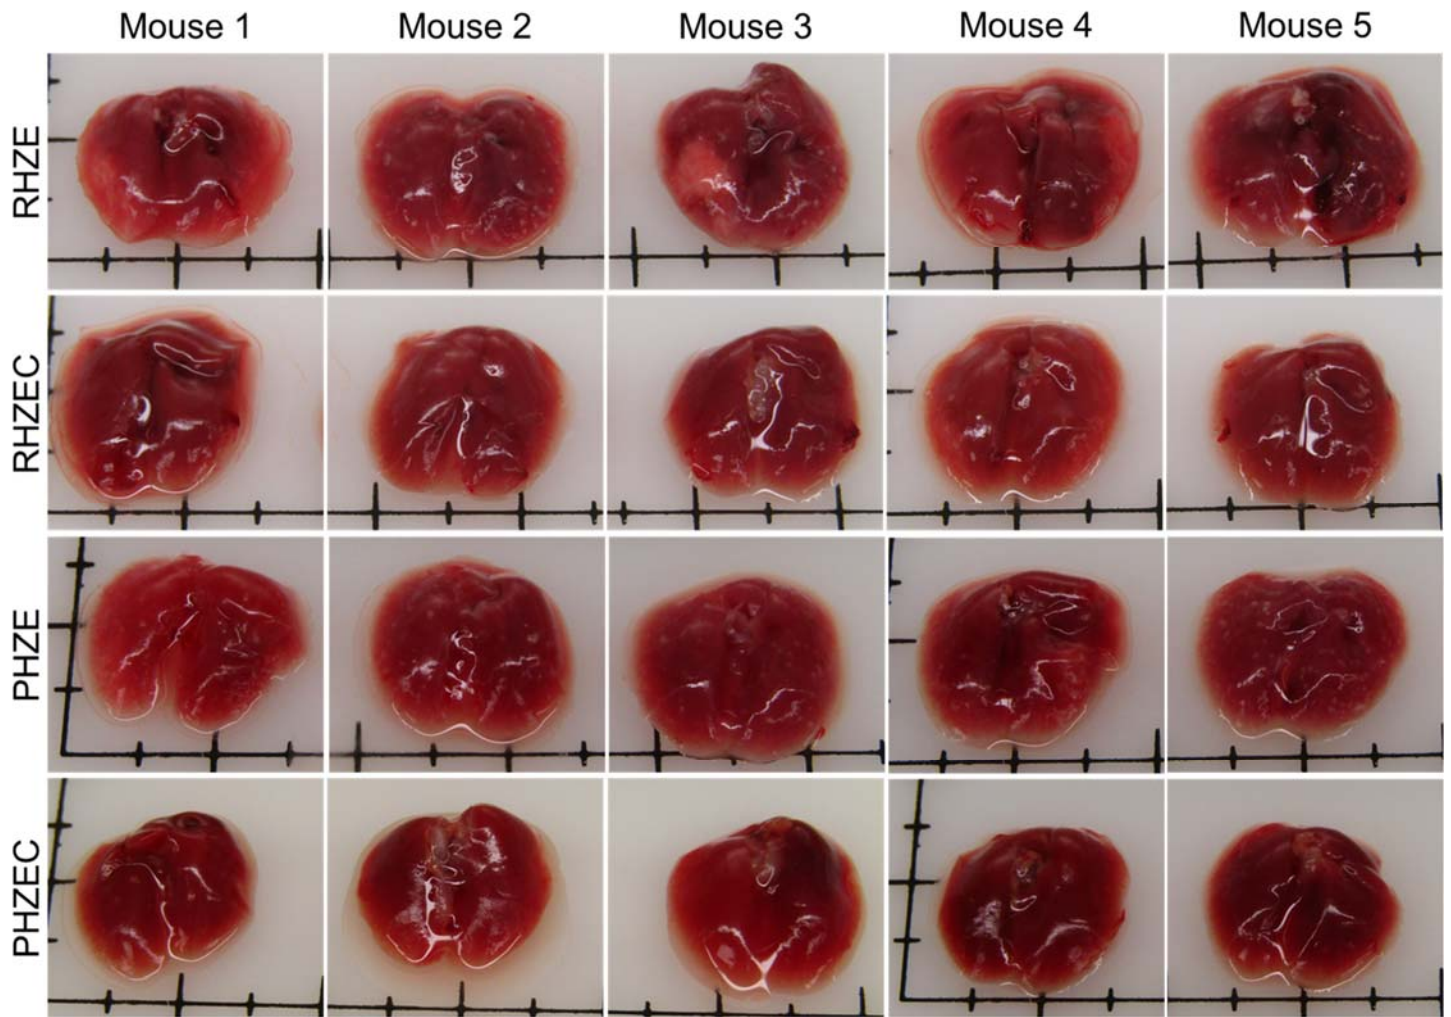

**Figure S6. BALB/c mouse lungs dissected after 10 weeks of treatment.** CFU counts for each lung are presented in **Table S7**. Tick marks are every 5 mm (large tick marks are 1 cm apart).



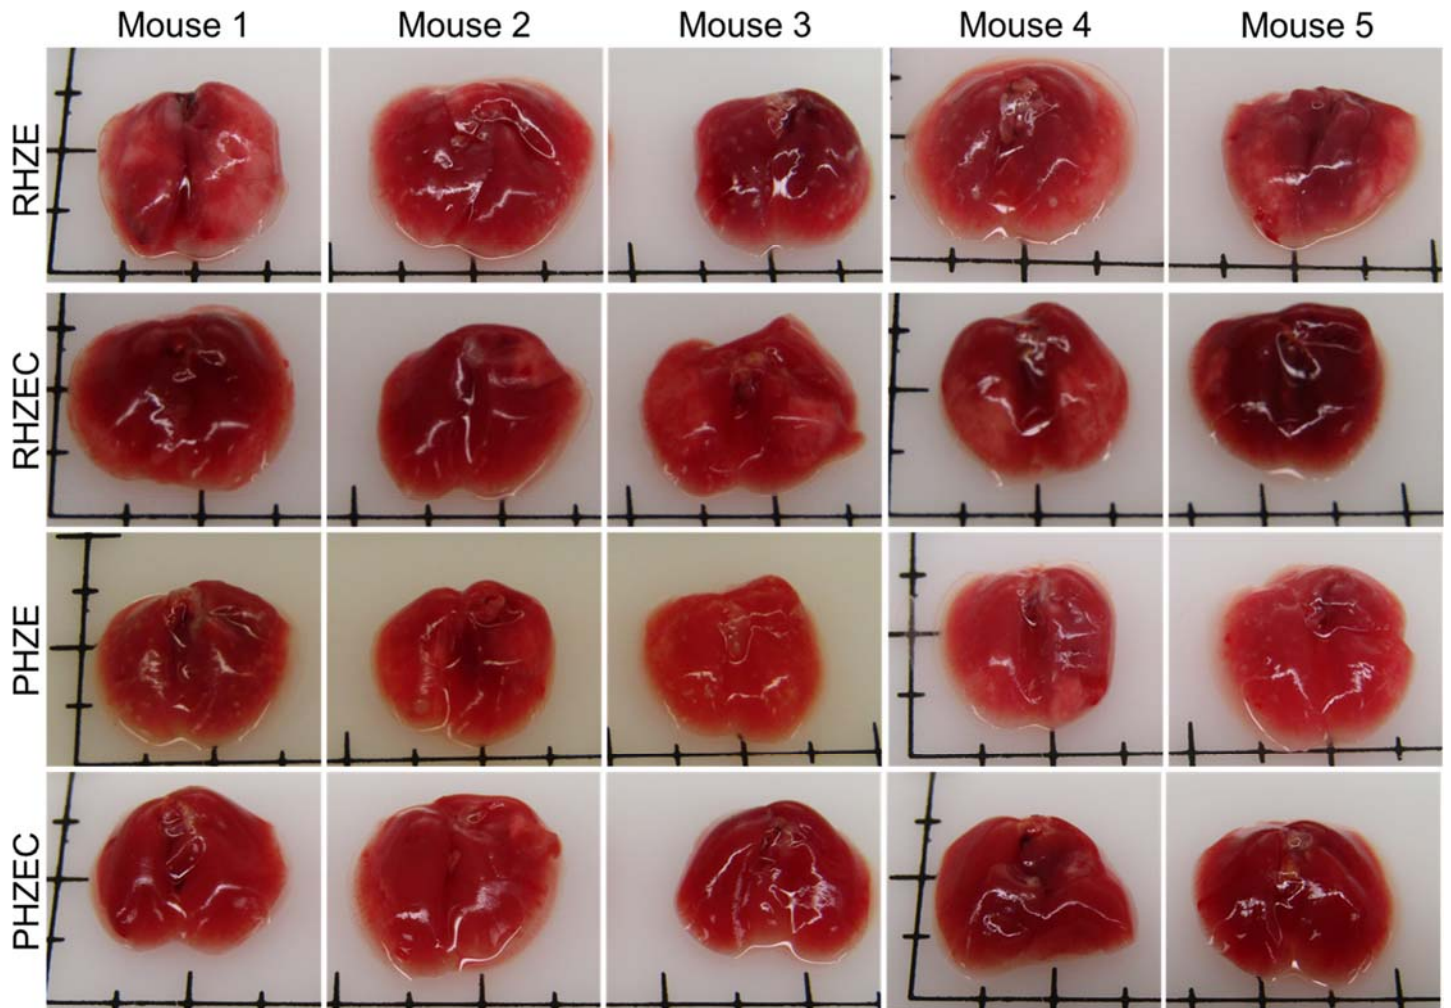

**Figure S7. BALB/c mouse lungs dissected after 12 weeks of treatment.** CFU counts for each lung are presented in **Table S8**. Tick marks are every 5 mm (large tick marks are 1 cm apart).



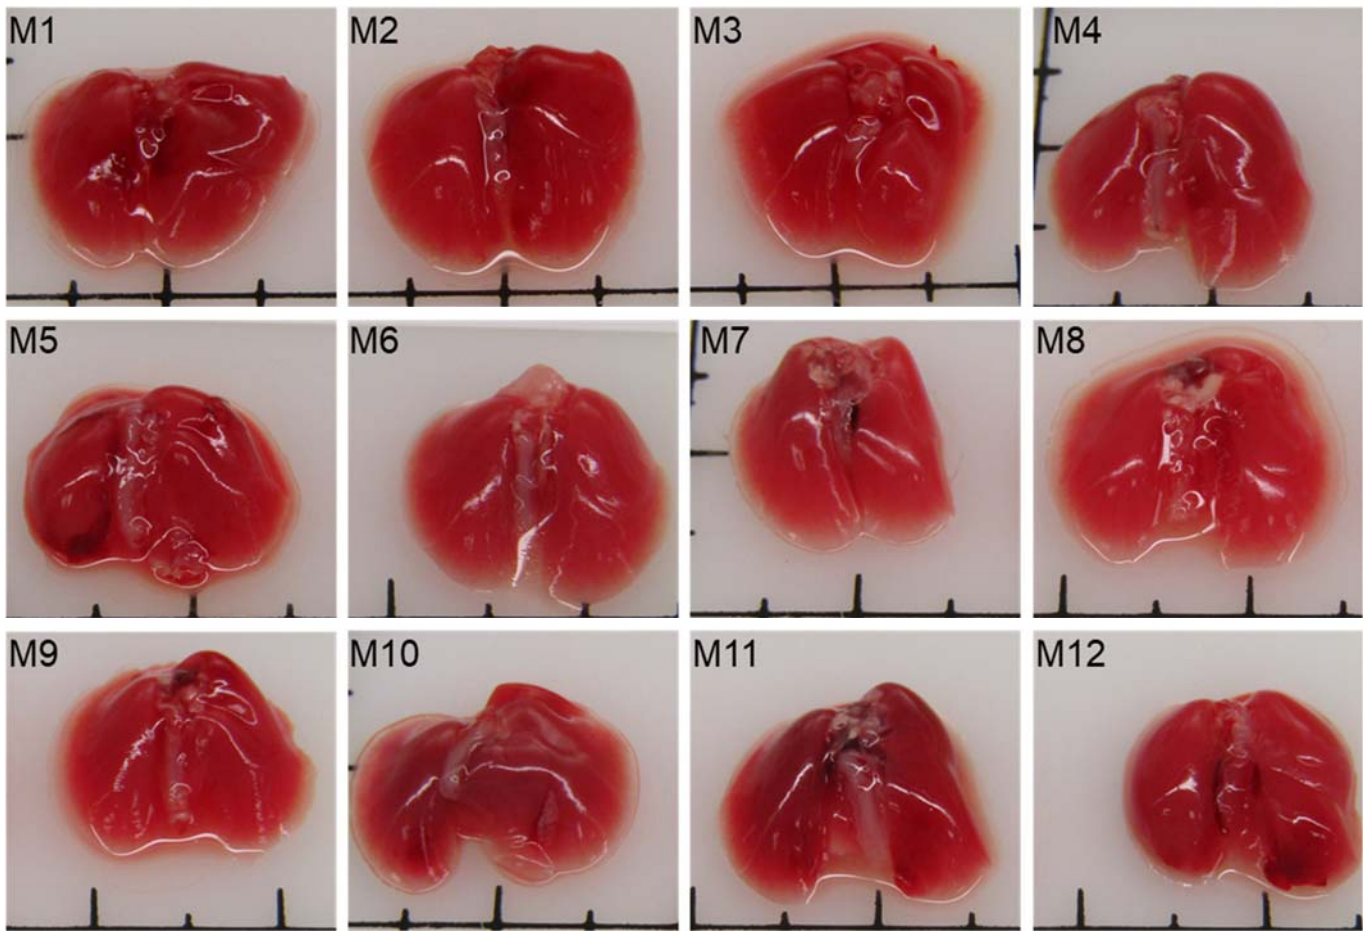

**Figure S9. C3HeB/FeJ mouse lungs dissected the day after infection (Week -6).** CFU counts for each lung are presented in **Table S2**. Tick marks are every 5 mm (large tick marks are 1 cm apart).

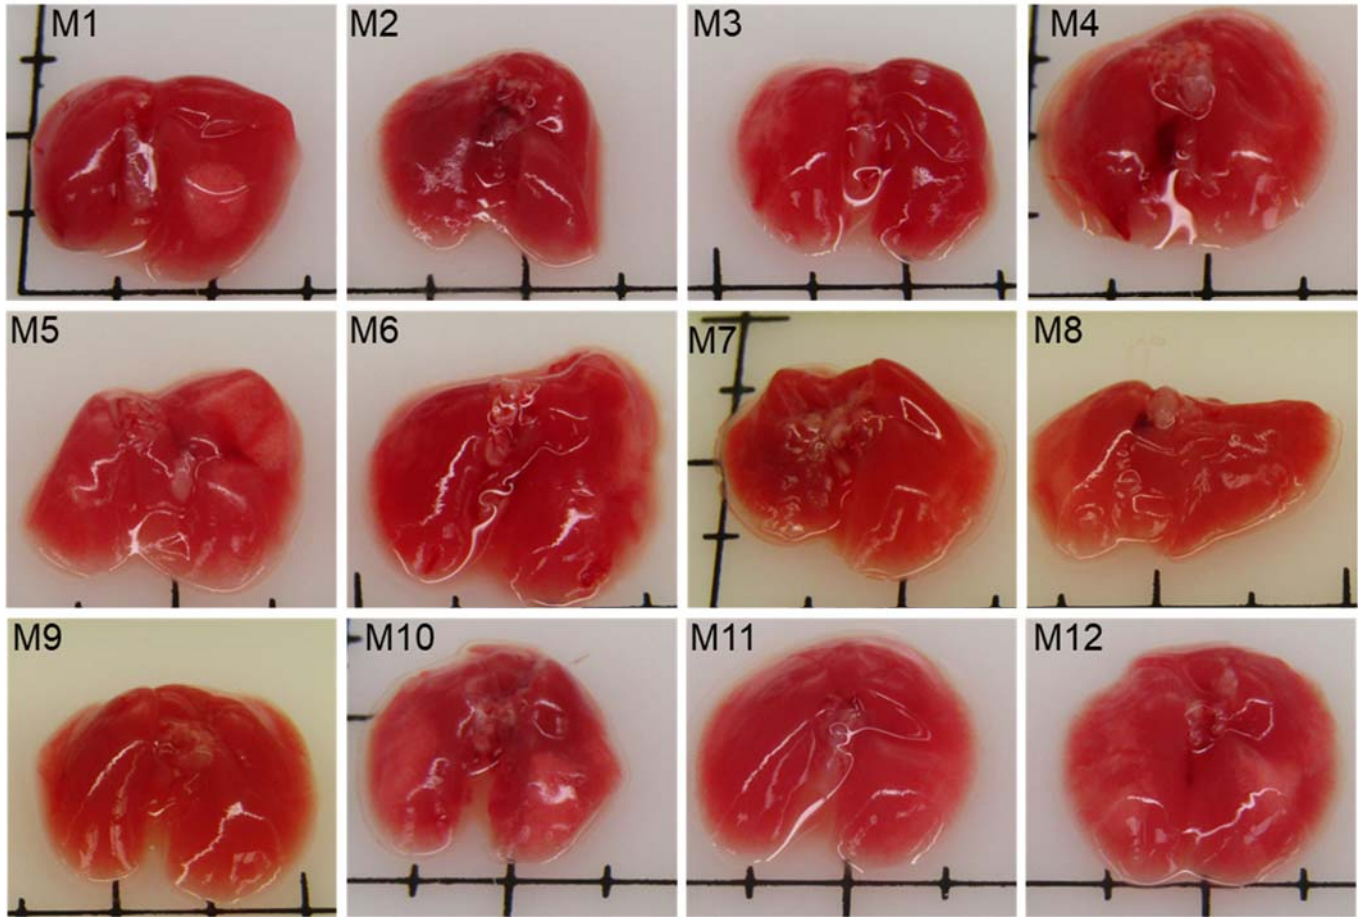

**Figure S10. C3HeB/FeJ mouse lungs dissected 3 weeks after infection (Week -3).** CFU counts for each lung are presented in **Table S13**. Tick marks are every 5 mm (large tick marks are 1 cm apart).

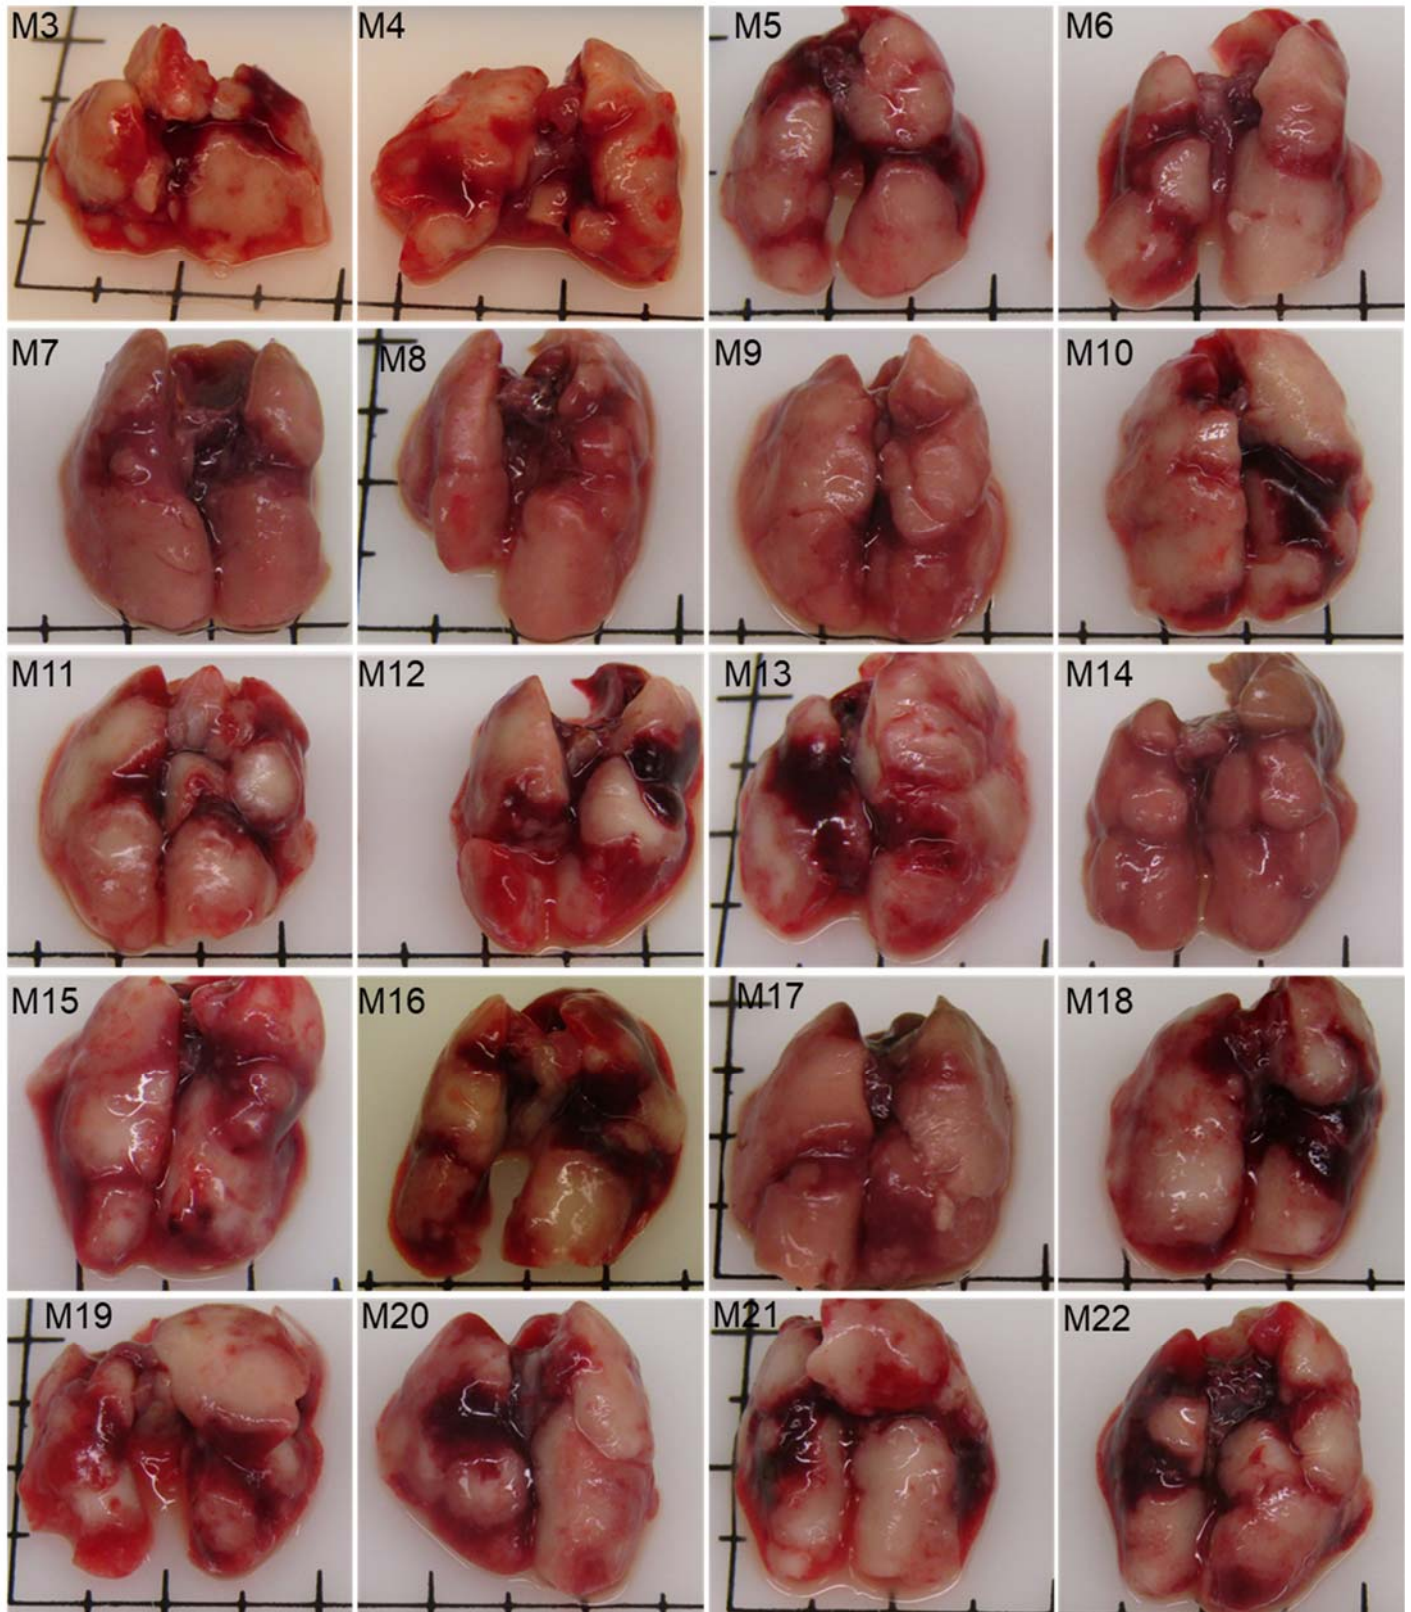

**Figure S11. C3HeB/FeJ mouse lungs dissected from mice that died after Week -3 but before treatment initiation on Day 0.** Date of death and lung CFU counts for each mouse are presented in **Table S14**. Tick marks are every 5 mm (large tick marks are 1 cm apart). Lungs were not collected for Mouse 1 and 2.

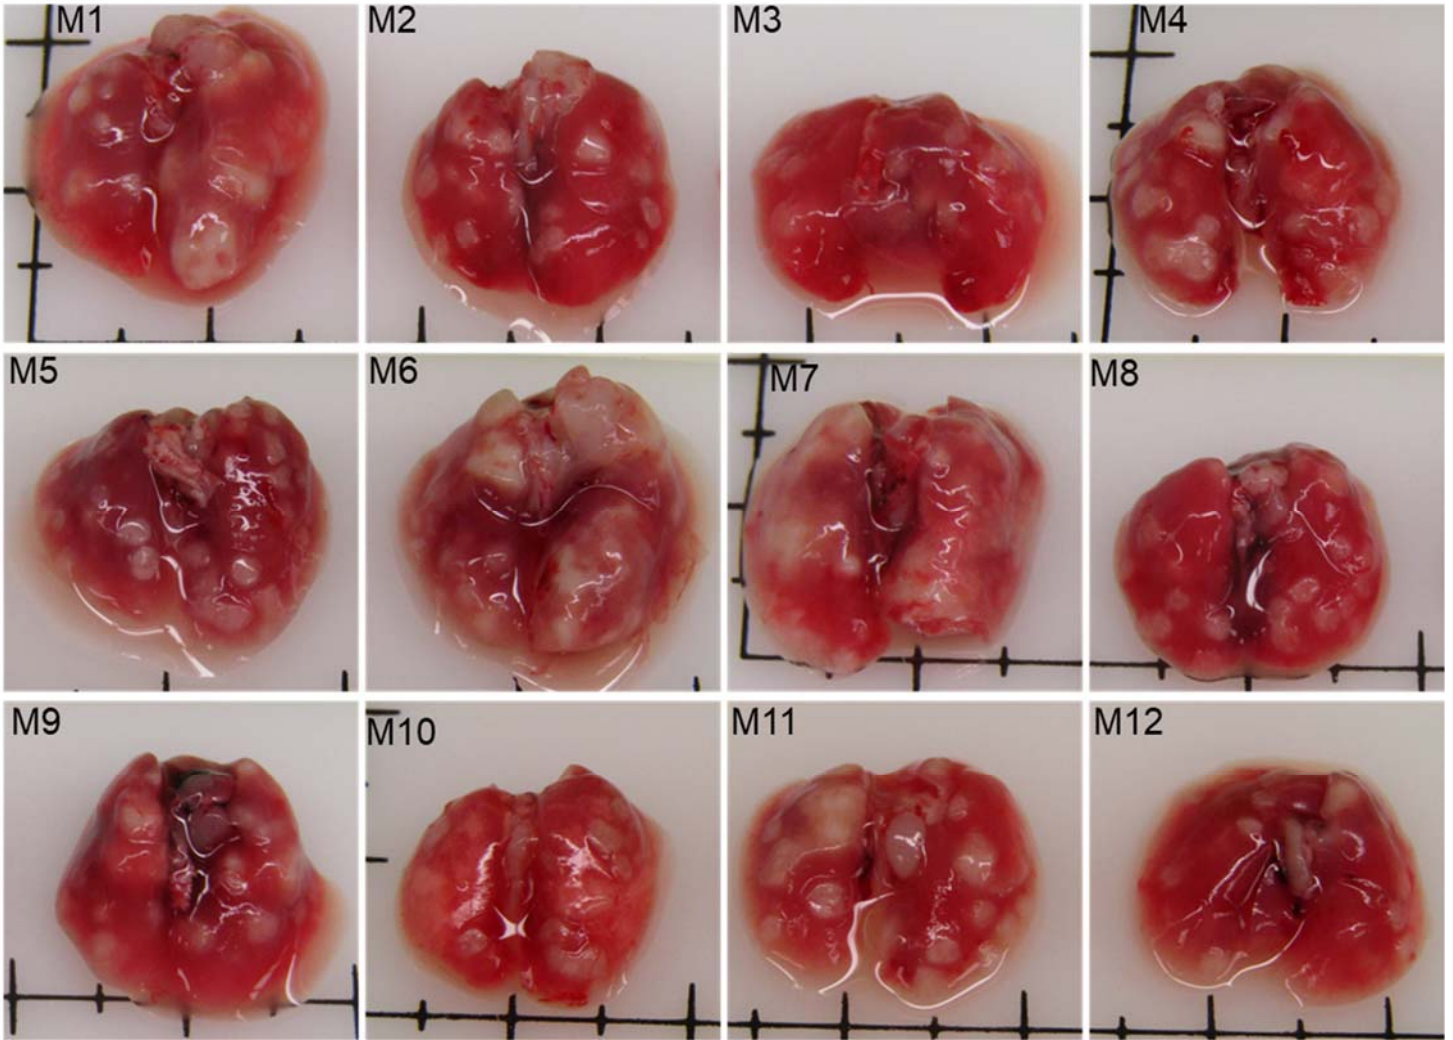

**Figure S12. C3HeB/FeJ mouse lungs dissected the day of treatment initiation (Day 0).** CFU counts for each lung are presented in **Table S13**. Tick marks are every 5 mm (large tick marks are 1 cm apart).

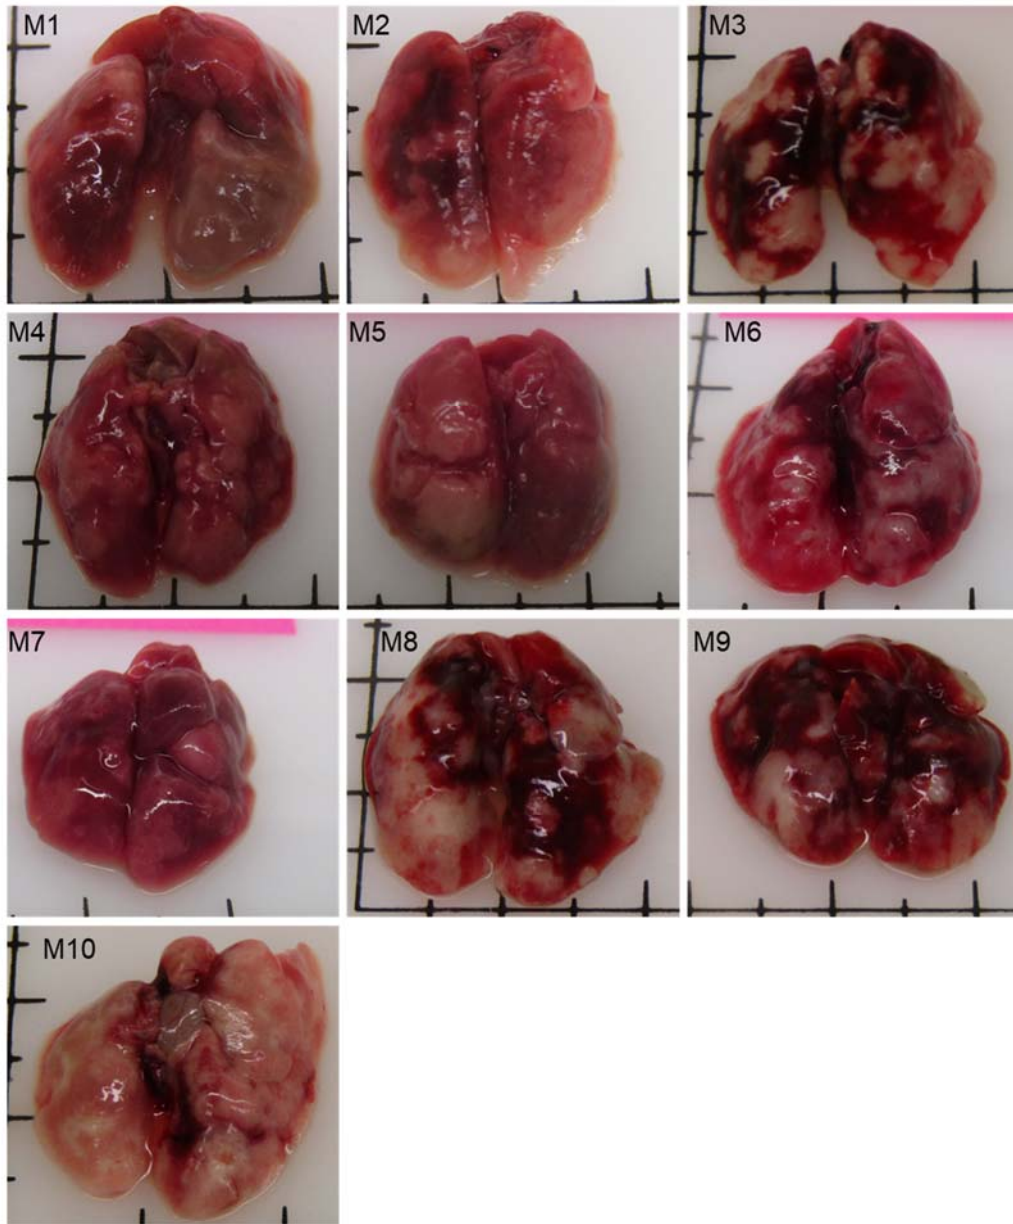

**Figure S13. C3HeB/FeJ mouse lungs dissected from untreated negative control mice.** Date of death and lung CFU counts for each mouse are presented in **Table S14**. Tick marks are every 5 mm (large tick marks are 1 cm apart).

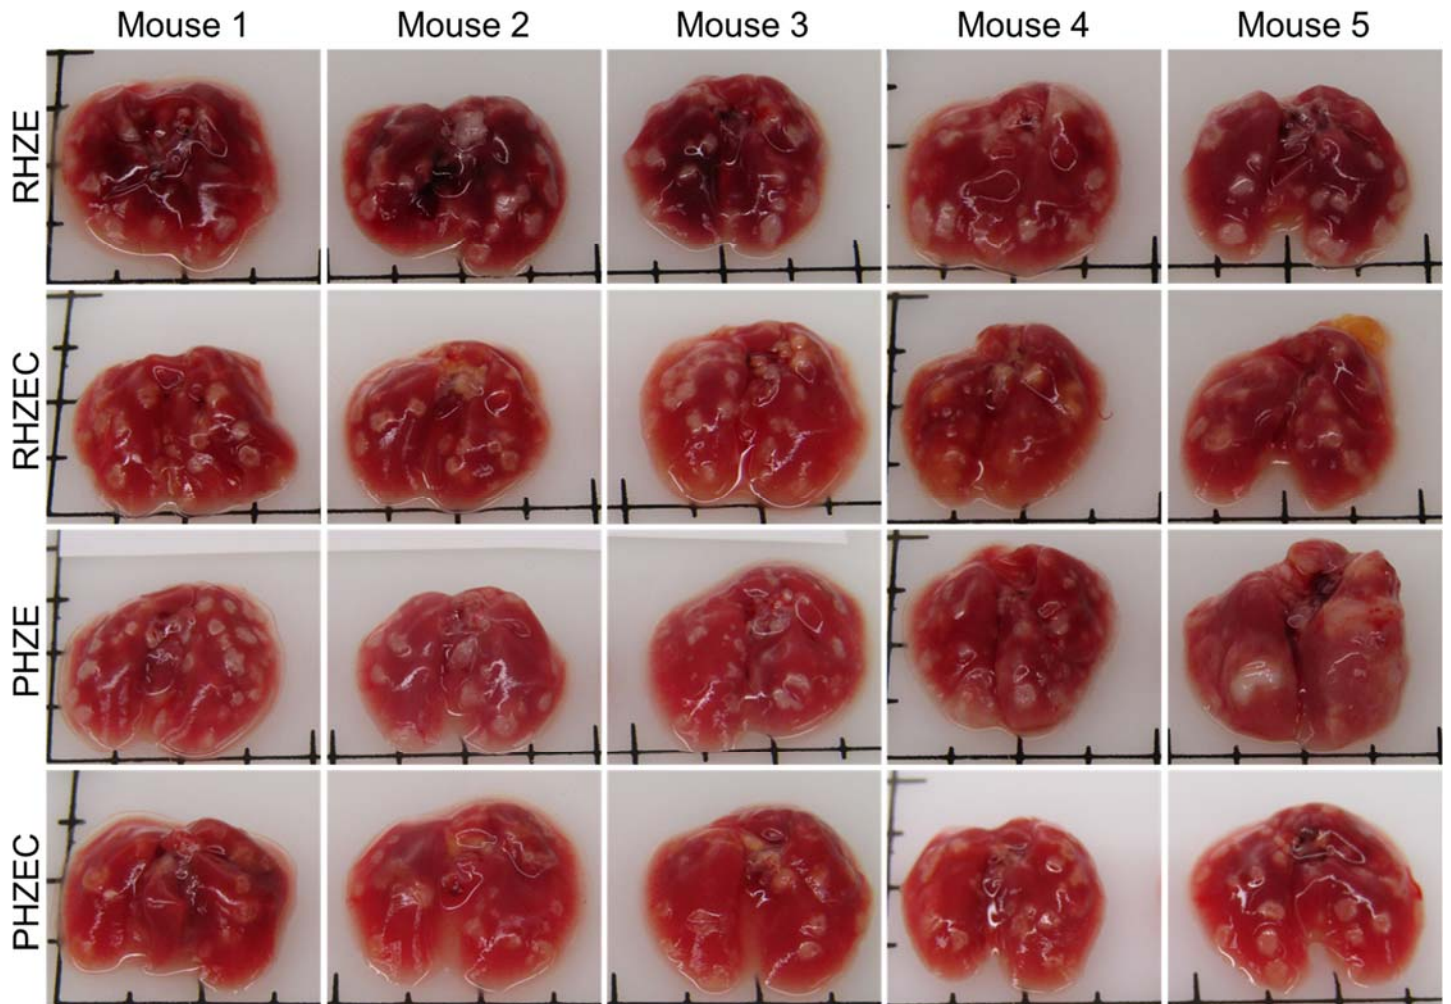

**Figure S14. C3HeB/FeJ mouse lungs dissected after 4 weeks of treatment.** CFU counts for each lung are presented in **Table S15**. Tick marks are every 5 mm (large tick marks are 1 cm apart).



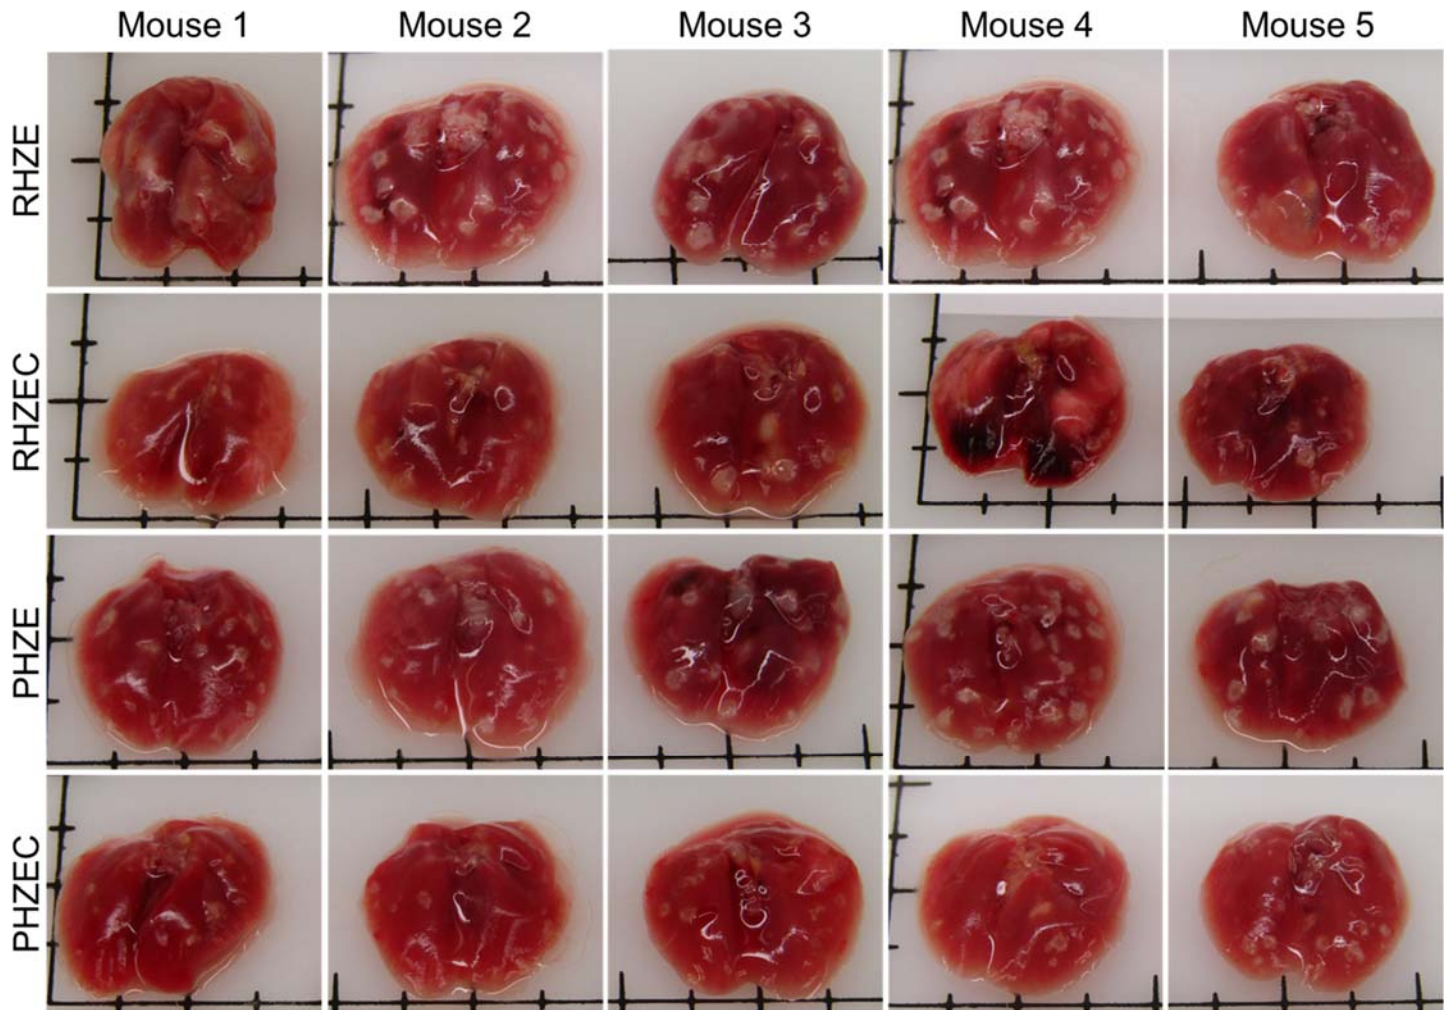

**Figure S15. C3HeB/FeJ mouse lungs dissected after 6 weeks of treatment.** CFU counts for each lung are presented in **Table S16**. Tick marks are every 5 mm (large tick marks are 1 cm apart).

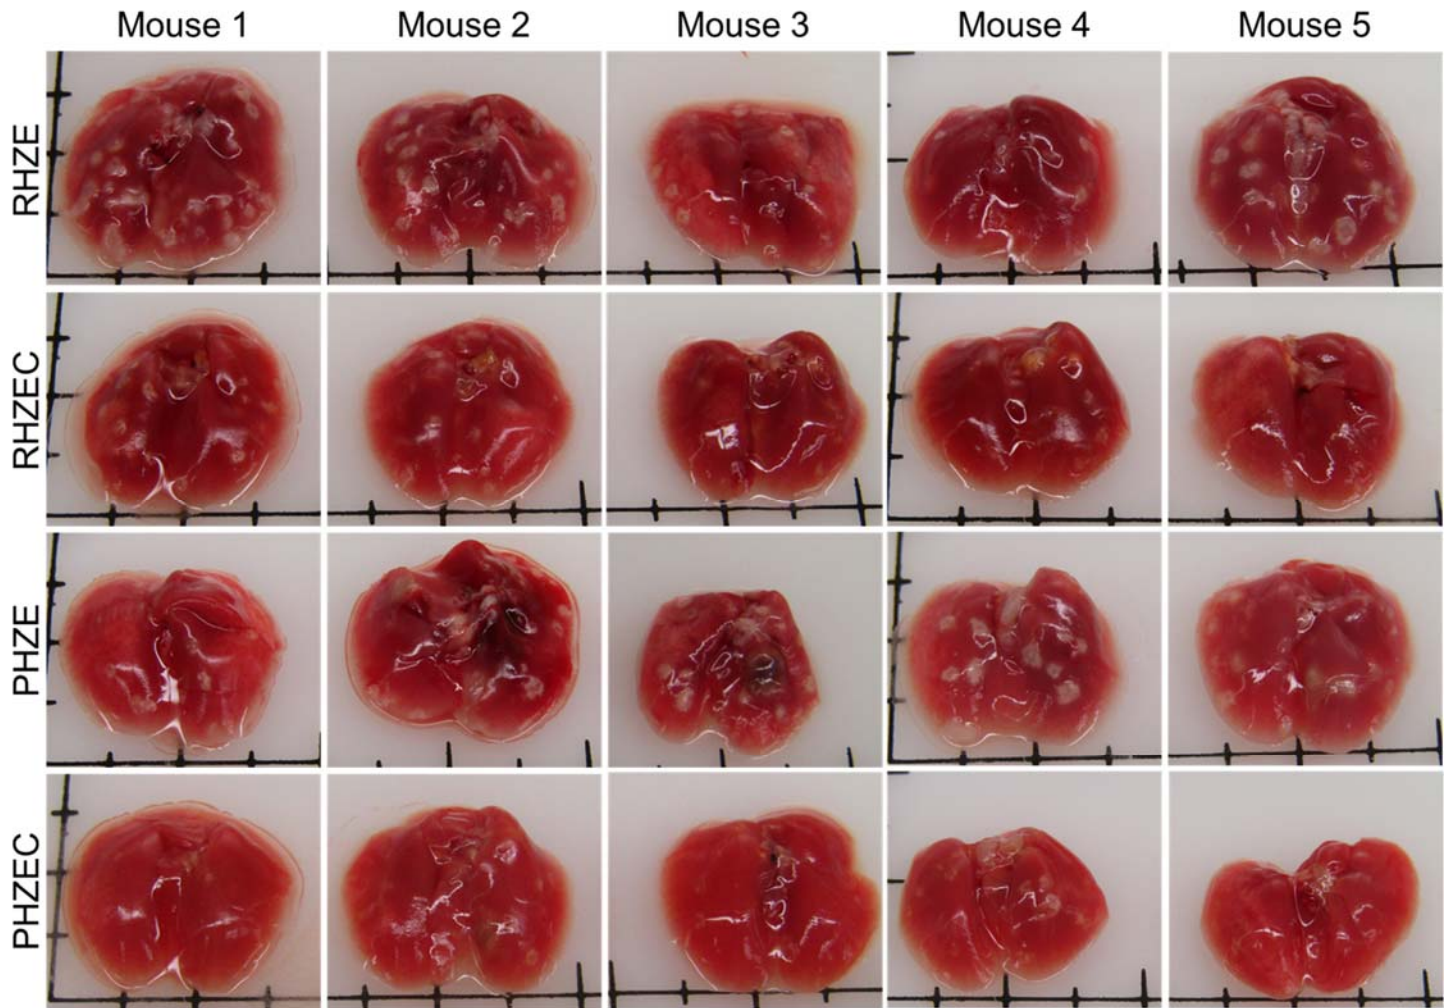

**Figure S16. C3HeB/FeJ mouse lungs dissected after 8 weeks of treatment.** CFU counts for each lung are presented in **Table S17**. Tick marks are every 5 mm (large tick marks are 1 cm apart).

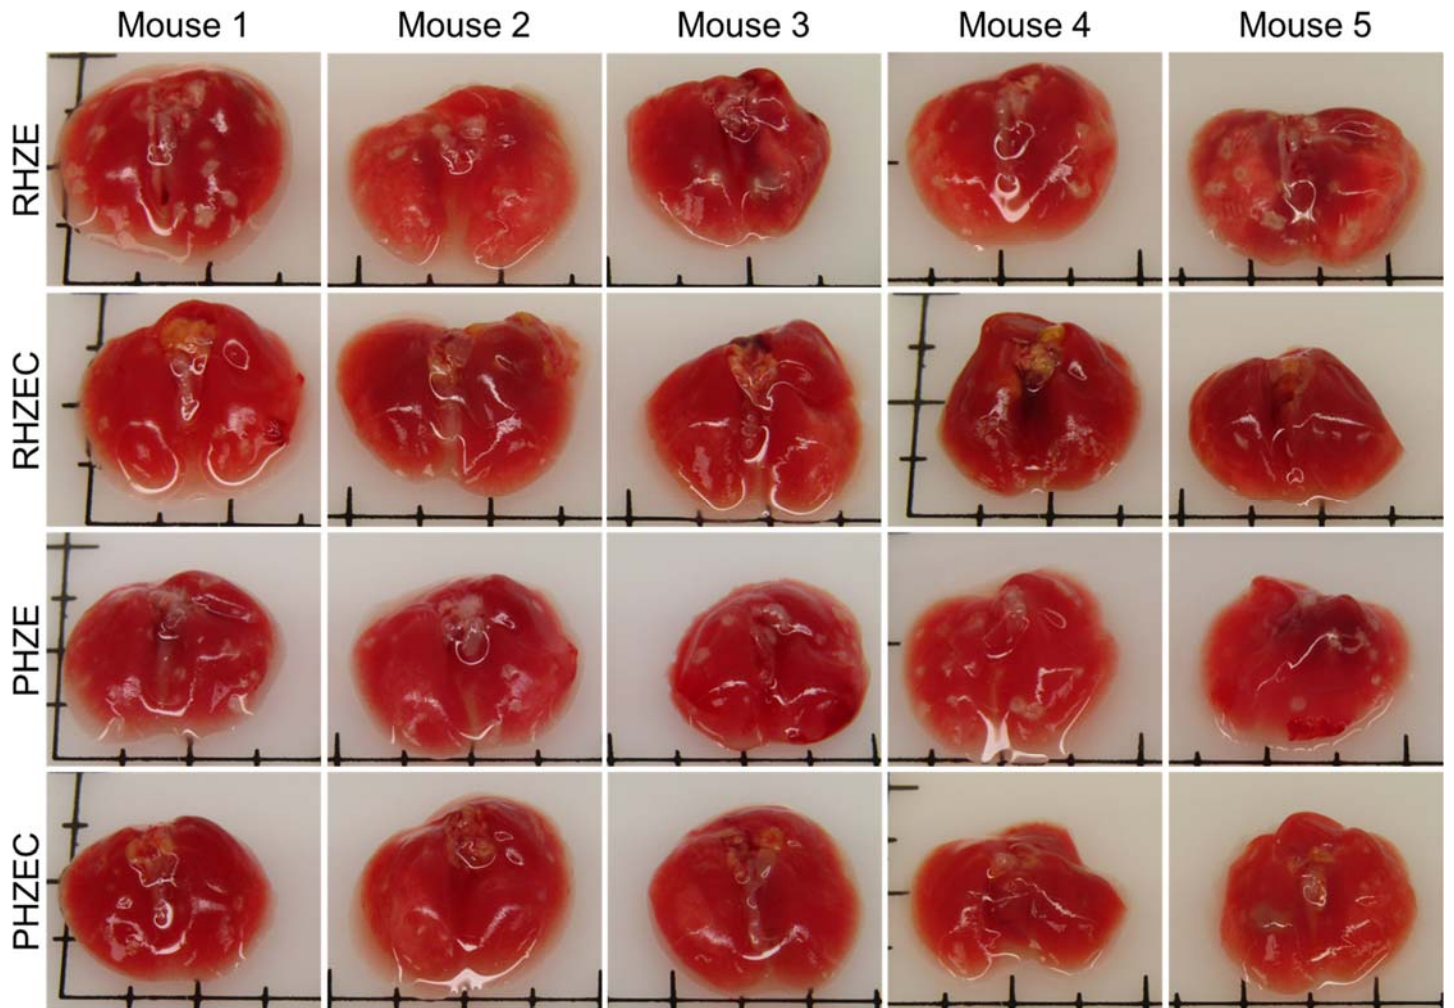

**Figure S17. C3HeB/FeJ mouse lungs dissected after 10 weeks of treatment.** CFU counts for each lung are presented in **Table S18**. Tick marks are every 5 mm (large tick marks are 1 cm apart).

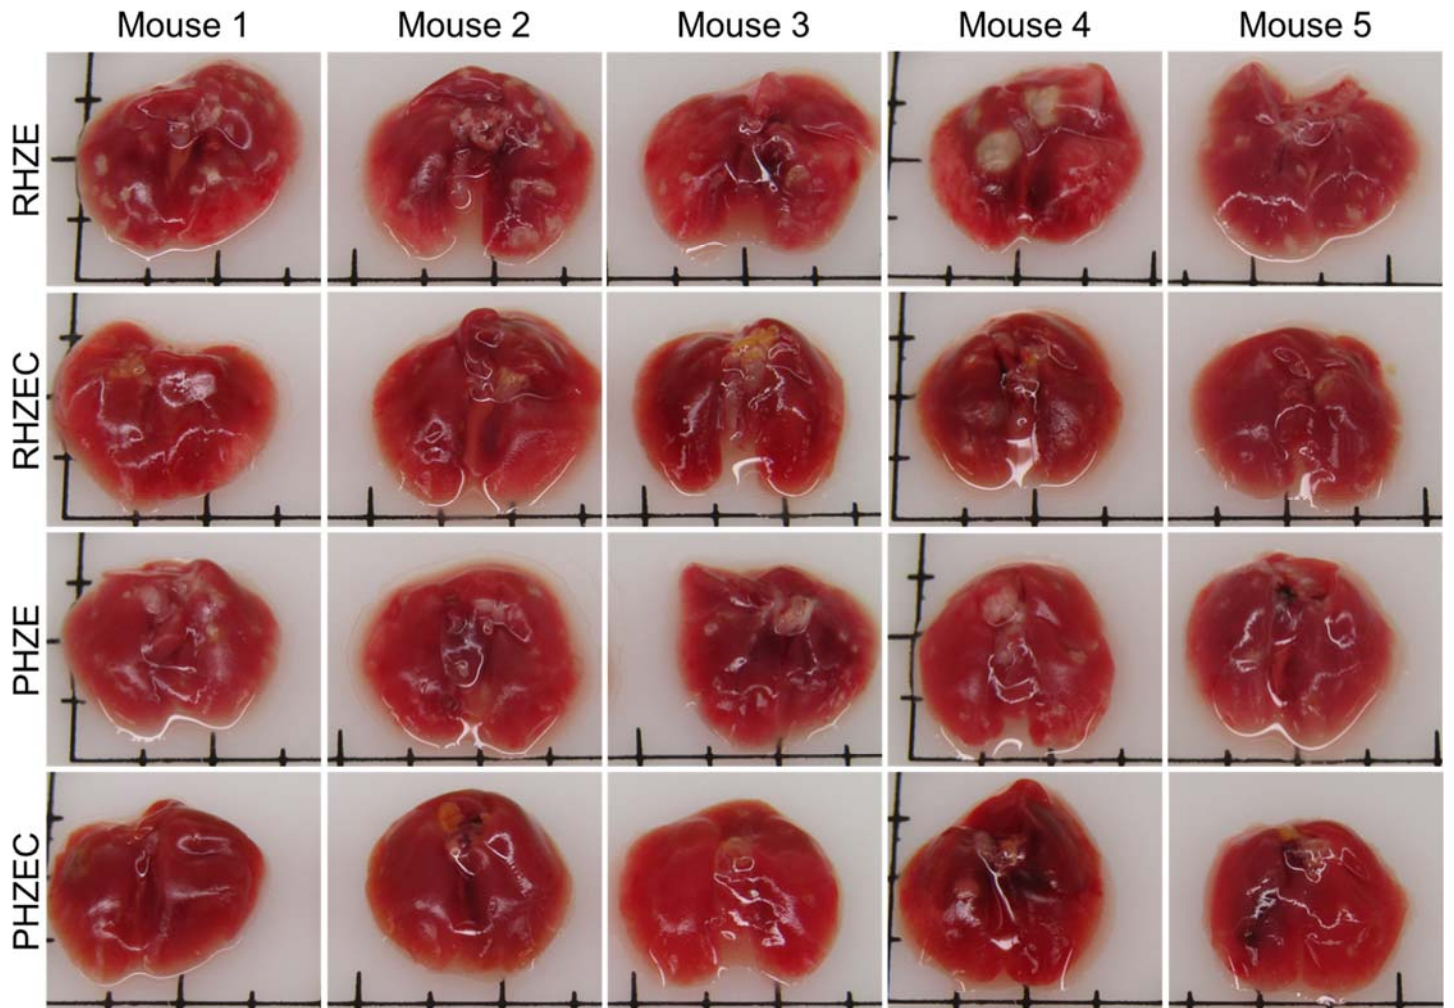

**Figure S18. C3HeB/FeJ mouse lungs dissected after 12 weeks of treatment.** CFU counts for each lung are presented in **Table S19**. Tick marks are every 5 mm (large tick marks are 1 cm apart).

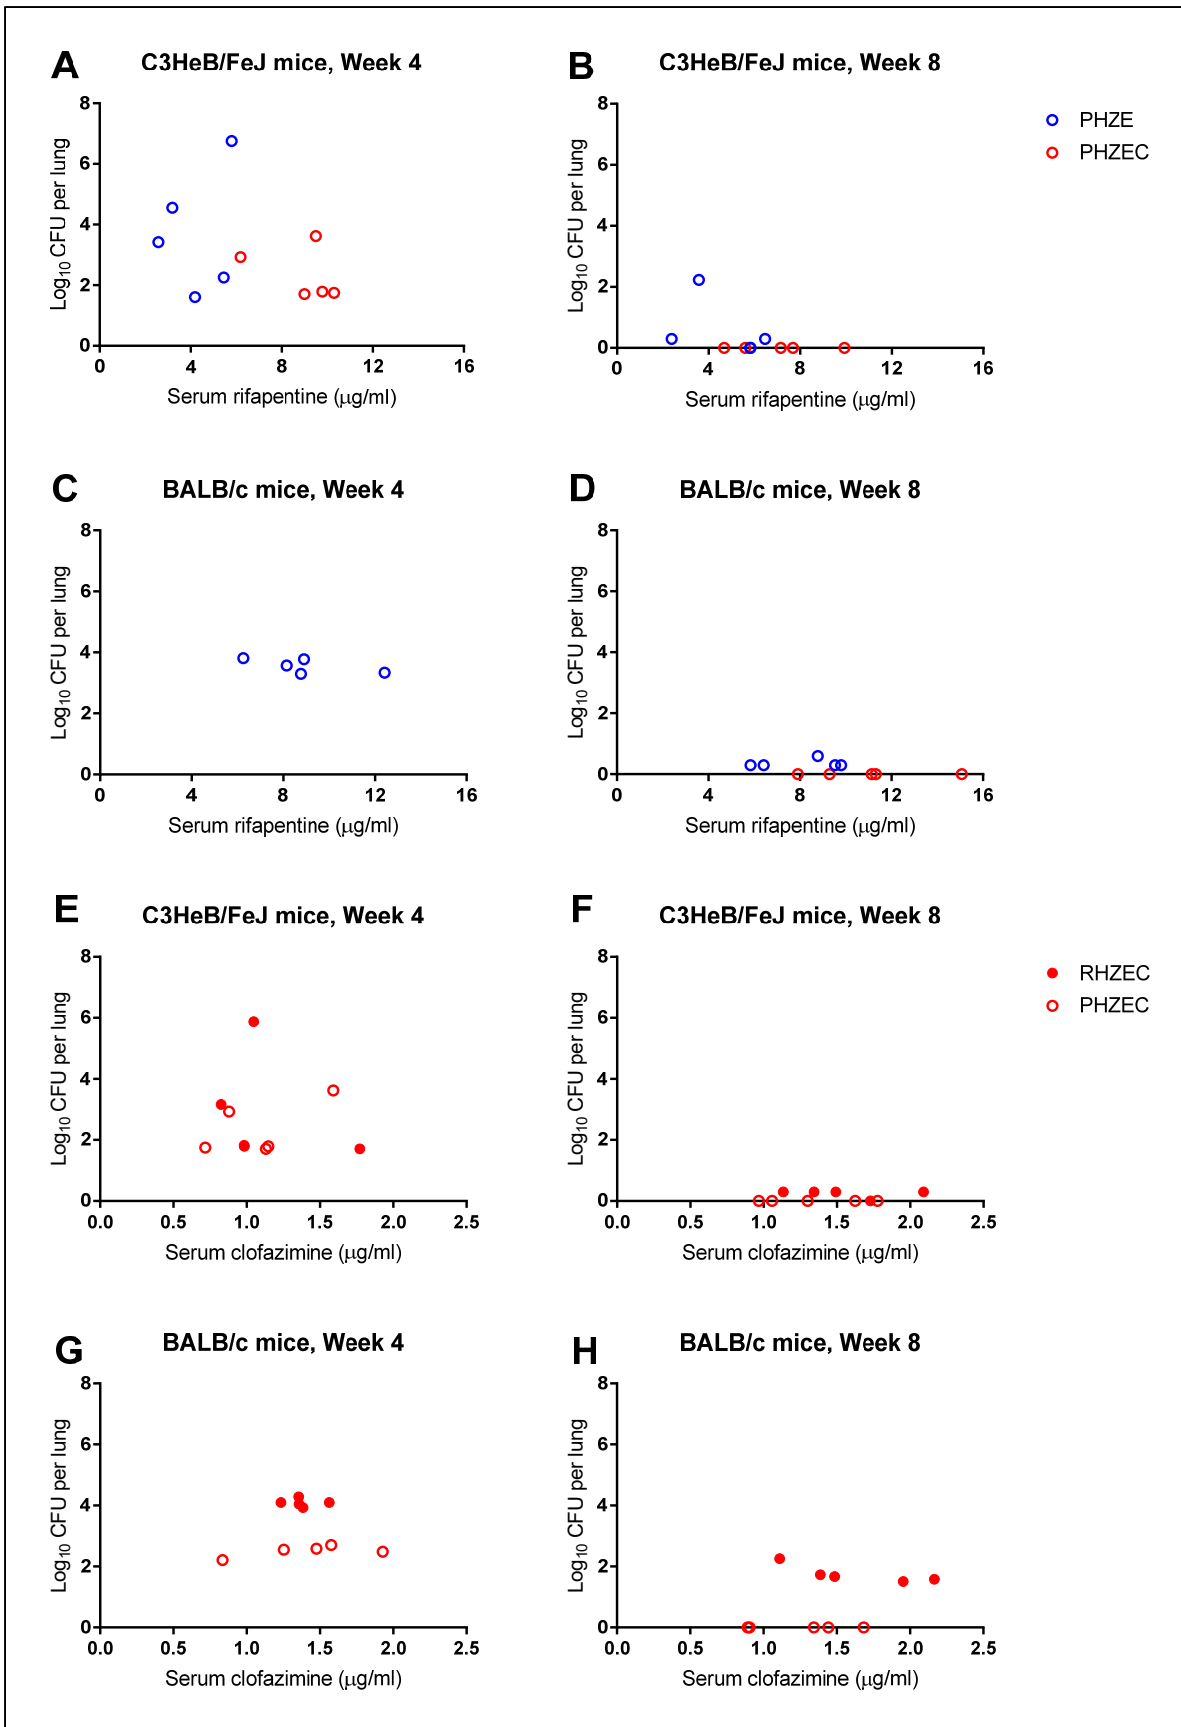

**Figure S19. Trough rifapentine (A-D) and clofazimine (E-H) serum levels and lung CFU counts for individual mice after 4 (A,C,E,G) and 8 (B,D,F,H) weeks of treatment. Each data point represents one mouse.**

**Table S1. CFU count data used to calculate the concentration of *M. tuberculosis* suspensions used for aerosol infections.** Bacterial suspensions and cognate 10-fold dilutions (0.5 mL volume) were cultured on non-selective 7H11 agar. 7H11 agar powder was manufactured by BD. All 10-fold dilutions of the bacterial suspension used for infection of C3HeB/FeJ mice were plated in duplicate, and the average CFU count was used to determine CFU/mL. The lower limit of detection for both samples was 0.48 log<sub>10</sub> CFU/mL.

| <i>M. tuberculosis</i> H37Rv suspension used for aerosol infection | Mouse strain infected | CFU counts for the following 10-fold dilutions:<br>(shaded cell used to calculate CFU/mL) |        |      |      |    |    |     |     | CFU/mL     | Log <sub>10</sub> CFU/mL |
|--------------------------------------------------------------------|-----------------------|-------------------------------------------------------------------------------------------|--------|------|------|----|----|-----|-----|------------|--------------------------|
|                                                                    |                       | 0                                                                                         | 1      | 2    | 3    | 4  | 5  | 6   | 7   |            |                          |
| Growing culture (OD <sub>600</sub> = 1.041)                        | BALB/c                | +++                                                                                       | ++/+++ | ++   | +/++ | +  | 73 | 3   | 0   | 14,600,000 | 7.16                     |
| Frozen stock (OD <sub>600</sub> 1.04),<br>diluted 15-fold in PBS   | C3HeB/FeJ             | ++/+++                                                                                    | ++     | +/++ | 225  | 21 | 2  | --- | --- | 450,000    | 5.65                     |
|                                                                    |                       | ---                                                                                       | ++     | +/++ | 255  | 24 | 3  | --- | --- |            |                          |

+++ indicates uniform confluent growth. ++ indicates non-uniform confluent growth. + indicates individual colonies too numerous to accurately count.  
 --- indicates not determined.

**Table S2. CFU count data used to calculate the number of *M. tuberculosis* implanted in mouse lungs during aerosol infection.** Mice were sacrificed the day after infection. Lung homogenates and cognate 10-fold dilutions (0.5 mL volume) were cultured on selective 7H11 agar ("plain" agar) and selective 7H11 agar supplemented with 0.4% activated charcoal. All 7H11 agar powder was manufactured by BD. The lower limit of detection was 0.78 log<sub>10</sub> CFU/lung per agar type.

| Mouse strain and time point | Aerosol infection run | Mouse | Agar type | CFU counts for the following 10-fold dilutions:<br>(shaded cell used to calculate CFU/lung) |      |     |     | CFU/lung | Log <sub>10</sub> CFU/lung |
|-----------------------------|-----------------------|-------|-----------|---------------------------------------------------------------------------------------------|------|-----|-----|----------|----------------------------|
|                             |                       |       |           | 0                                                                                           | 1    | 2   | 3   |          |                            |
| BALB/c,<br>Week -2          | Run 1                 | 1     | Plain     | +++                                                                                         | ~500 | 40  | 1   | 20,000   | 4.30                       |
|                             |                       |       | Charcoal  | +++                                                                                         | ~500 | 41  | 2   | 20,500   | 4.31                       |
|                             |                       | 2     | Plain     | +++                                                                                         | ~200 | 26  | 3   | 13,000   | 4.11                       |
|                             |                       |       | Charcoal  | +++                                                                                         | ~300 | 23  | 1   | 11,500   | 4.06                       |
|                             |                       | 3     | Plain     | +++                                                                                         | ~300 | 39  | 4   | 19,500   | 4.29                       |
|                             |                       |       | Charcoal  | +++                                                                                         | ~300 | 36  | 4   | 18,000   | 4.26                       |
|                             | Run 2                 | 4     | Plain     | +++                                                                                         | ~500 | 46  | 3   | 23,000   | 4.36                       |
|                             |                       |       | Charcoal  | +++                                                                                         | ~500 | 48  | 1   | 24,000   | 4.38                       |
|                             |                       | 5     | Plain     | +++                                                                                         | ~500 | 41  | 6   | 20,500   | 4.31                       |
|                             |                       |       | Charcoal  | +++                                                                                         | ~500 | 51  | 4   | 25,500   | 4.41                       |
|                             |                       | 6     | Plain     | +++                                                                                         | ~500 | 55  | 4   | 27,500   | 4.44                       |
|                             |                       |       | Charcoal  | +++                                                                                         | ~500 | 57  | 5   | 28,500   | 4.45                       |
|                             | Run 3                 | 7     | Plain     | +++                                                                                         | ~300 | 29  | 2   | 14,500   | 4.16                       |
|                             |                       |       | Charcoal  | +++                                                                                         | ~400 | 23  | 2   | 11,500   | 4.06                       |
|                             |                       | 8     | Plain     | +++                                                                                         | ~400 | 20  | 1   | 10,000   | 4.00                       |
|                             |                       |       | Charcoal  | +++                                                                                         | ~400 | 25  | 1   | 12,500   | 4.10                       |
|                             |                       | 9     | Plain     | +++                                                                                         | ~300 | 23  | 2   | 11,500   | 4.06                       |
|                             |                       |       | Charcoal  | +++                                                                                         | ~300 | 18  | 0   | 9,000    | 3.95                       |
| C3HeB/FeJ,<br>Week -6       | Run 1                 | 1     | Plain     | 24                                                                                          | 2    | --- | --- | 120      | 2.08                       |
|                             |                       |       | Charcoal  | 18                                                                                          | 1    | --- | --- | 90       | 1.96                       |
|                             |                       | 2     | Plain     | 17                                                                                          | 0    | --- | --- | 85       | 1.93                       |
|                             |                       |       | Charcoal  | 27                                                                                          | 0    | --- | --- | 135      | 2.13                       |
|                             |                       | 3     | Plain     | 8                                                                                           | 1    | --- | --- | 40       | 1.61                       |
|                             |                       |       | Charcoal  | 17                                                                                          | 0    | --- | --- | 85       | 1.93                       |
|                             | Run 2                 | 4     | Plain     | 16                                                                                          | 4    | --- | --- | 80       | 1.91                       |
|                             |                       |       | Charcoal  | 30                                                                                          | 1    | --- | --- | 150      | 2.18                       |
|                             |                       | 5     | Plain     | 8                                                                                           | 0    | --- | --- | 40       | 1.61                       |
|                             |                       |       | Charcoal  | 22                                                                                          | 0    | --- | --- | 110      | 2.05                       |
|                             |                       | 6     | Plain     | 12                                                                                          | 0    | --- | --- | 60       | 1.79                       |
|                             |                       |       | Charcoal  | 21                                                                                          | 0    | --- | --- | 105      | 2.03                       |
|                             | Run 3                 | 7     | Plain     | 20                                                                                          | 3    | --- | --- | 100      | 2.00                       |
|                             |                       |       | Charcoal  | 27                                                                                          | 4    | --- | --- | 135      | 2.13                       |
|                             |                       | 8     | Plain     | 11                                                                                          | 1    | --- | --- | 55       | 1.75                       |
|                             |                       |       | Charcoal  | 24                                                                                          | 0    | --- | --- | 120      | 2.08                       |
|                             |                       | 9     | Plain     | 9                                                                                           | 1    | --- | --- | 45       | 1.66                       |
|                             |                       |       | Charcoal  | 27                                                                                          | 1    | --- | --- | 135      | 2.13                       |
|                             | Run 4                 | 10    | Plain     | 12                                                                                          | 2    | --- | --- | 60       | 1.79                       |
|                             |                       |       | Charcoal  | 20                                                                                          | 1    | --- | --- | 100      | 2.00                       |
|                             |                       | 11    | Plain     | 9                                                                                           | 0    | --- | --- | 45       | 1.66                       |
|                             |                       |       | Charcoal  | 13                                                                                          | 4    | --- | --- | 65       | 1.82                       |
|                             |                       | 12    | Plain     | 3                                                                                           | 0    | --- | --- | 15       | 1.20                       |
|                             |                       |       | Charcoal  | 12                                                                                          | 3    | --- | --- | 60       | 1.79                       |

++ indicates non-uniform confluent growth. + indicates individual colonies too numerous to accurately count. ~ indicates that an accurate CFU count could not be obtained due to some merged/touching colonies. --- indicates not determined.

Table S2

**Table S3. BALB/c lung CFU count data used to calculate CFU/lung at treatment initiation (Day 0) and for the untreated negative control mice.** Lung homogenates and cognate 10-fold dilutions (0.5 mL volume) were cultured on selective 7H11 agar ("plain" agar) and selective 7H11 agar supplemented with 0.4% activated charcoal. All 7H11 agar powder was manufactured by BD. The lower limit of detection was 0.78 and 1.71 log<sub>10</sub> CFU/lung per agar type for Day 0 and Week 1 samples, respectively.

| Time point                         | Aerosol infection run | BALB/c mouse | Agar type | CFU counts for the following 10-fold dilutions:<br>(shaded cell used to calculate CFU/lung) |        |        |        |      |      |     |            | CFU/lung    | Log <sub>10</sub> CFU/lung |
|------------------------------------|-----------------------|--------------|-----------|---------------------------------------------------------------------------------------------|--------|--------|--------|------|------|-----|------------|-------------|----------------------------|
|                                    |                       |              |           | 0                                                                                           | 1      | 2      | 3      | 4    | 5    | 6   | 7          |             |                            |
| Day 0<br>(14 days post-infection)  | Run 1                 | 1            | Plain     | +++                                                                                         | ++/+++ | ++     | +      | ~200 | 12   | 2   | ---        | 6,000,000   | 6.78                       |
|                                    |                       |              | Charcoal  | +++                                                                                         | ++/+++ | ++     | +      | ~200 | 18   | 1   | ---        | 9,000,000   | 6.95                       |
|                                    |                       | 2            | Plain     | +++                                                                                         | +++    | ++/+++ | +      | ~200 | 28   | 0   | ---        | 14,000,000  | 7.15                       |
|                                    |                       |              | Charcoal  | +++                                                                                         | +++    | ++/+++ | +      | ~200 | 23   | 1   | ---        | 11,500,000  | 7.06                       |
|                                    |                       | 3            | Plain     | +++                                                                                         | +++    | ++/+++ | +      | ~200 | 19   | 2   | ---        | 9,500,000   | 6.98                       |
|                                    |                       |              | Charcoal  | +++                                                                                         | +++    | ++/+++ | +      | ~200 | 11   | 2   | ---        | 5,500,000   | 6.74                       |
|                                    | Run 2                 | 4            | Plain     | +++                                                                                         | ++/+++ | ++/+++ | +/++   | ~300 | 32   | 2   | ---        | 16,000,000  | 7.20                       |
|                                    |                       |              | Charcoal  | +++                                                                                         | ++/+++ | ++/+++ | +      | ~200 | 33   | 1   | ---        | 16,500,000  | 7.22                       |
|                                    |                       | 5            | Plain     | +++                                                                                         | +++    | ++/+++ | +      | ~200 | 28   | 1   | ---        | 14,000,000  | 7.15                       |
|                                    |                       |              | Charcoal  | +++                                                                                         | +++    | ++/+++ | +      | ~200 | 23   | 1   | ---        | 11,500,000  | 7.06                       |
|                                    |                       | 6            | Plain     | +++                                                                                         | +++    | ++/+++ | +/++   | ~200 | 24   | 3   | ---        | 12,000,000  | 7.08                       |
|                                    |                       |              | Charcoal  | +++                                                                                         | ++/+++ | ++/+++ | +      | ~200 | 27   | 1   | ---        | 13,500,000  | 7.13                       |
|                                    | Run 3                 | 7            | Plain     | +++                                                                                         | +++    | ++/+++ | +/++   | ~200 | 34   | 3   | ---        | 17,000,000  | 7.23                       |
|                                    |                       |              | Charcoal  | +++                                                                                         | +++    | ++/+++ | +      | ~300 | 33   | 1   | ---        | 16,500,000  | 7.22                       |
|                                    |                       | 8            | Plain     | +++                                                                                         | +++    | ++/+++ | +/++   | ~200 | 26   | 2   | ---        | 13,000,000  | 7.11                       |
| Charcoal                           |                       |              | +++       | +++                                                                                         | ++/+++ | +/++   | ~300   | 27   | 4    | --- | 13,500,000 | 7.13        |                            |
| 9                                  |                       | Plain        | +++       | +++                                                                                         | ++/+++ | +/++   | ~200   | 20   | 7    | --- | 10,000,000 | 7.00        |                            |
|                                    |                       | Charcoal     | +++       | +++                                                                                         | ++/+++ | +/++   | ~200   | 38   | 4    | --- | 19,000,000 | 7.28        |                            |
| Week 1<br>(21 days post-infection) | Run 1                 | 1            | Plain     | ---                                                                                         | +++    | +++    | ++     | +    | ~500 | 35  | 0          | 175,000,000 | 8.24                       |
|                                    | Run 2                 | 2            | Plain     | ---                                                                                         | +++    | +++    | ++/+++ | ++   | +    | 74  | 5          | 370,000,000 | 8.57                       |
|                                    | Run 3                 | 3            | Plain     | ---                                                                                         | +++    | +++    | ++/+++ | +/++ | ~500 | 46  | 7          | 230,000,000 | 8.36                       |

+++ indicates uniform confluent growth. ++ indicates non-uniform confluent growth. + indicates individual colonies too numerous to accurately count.  
~ indicates that an accurate CFU count could not be obtained due to some merged/touching colonies. --- indicates not determined.

Table S3



**Table S4. BALB/c lung CFU count data used to calculate CFU/lung after 4 weeks of treatment.** Lung homogenates and cognate 10-fold dilutions (0.5 mL volume) were cultured on selective 7H11 agar ("plain" agar) and selective 7H11 agar supplemented with 0.4% activated charcoal. 7H11 agar powder was manufactured by Remel Microbiology Products (all samples) and BD (one sample from each treatment group). During the study, BD 7H11 agar powder became temporarily unavailable, and therefore Remel 7H11 agar powder was used for all cultures at treatment time points. For one mouse in each treatment group, we plated homogenates in parallel on agar from both manufacturers. Only CFU counts obtained using Remel agar were used for further analyses.

| Regimen | BALB/c mouse | Agar type     | CFU counts for the following 10-fold dilutions:<br>(shaded cell used to calculate CFU/lung) |      |      |    |   | CFU/lung | Log <sub>10</sub> CFU/lung | LLOD |      |
|---------|--------------|---------------|---------------------------------------------------------------------------------------------|------|------|----|---|----------|----------------------------|------|------|
|         |              |               | 0                                                                                           | 1    | 2    | 3  | 4 |          |                            |      |      |
| RHZE    | 1            | Plain (BD)    | ---                                                                                         | +    | 171  | 11 | 0 | 55,000   | 4.74                       | 1.71 |      |
|         |              | Charcoal (BD) | ---                                                                                         | +    | 220  | 23 | 2 | 115,000  | 5.06                       | 1.71 |      |
|         |              | Plain         | +/>+                                                                                        | +    | 90   | 9  | 0 | 45,000   | 4.65                       | 0.78 |      |
|         |              | Charcoal      | +/>+                                                                                        | +    | 134  | 15 | 0 | 75,000   | 4.88                       | 0.78 |      |
|         | 2            | Plain         | +/>+                                                                                        | +    | 67   | 11 | 1 | 33,500   | 4.53                       | 0.78 |      |
|         |              | Charcoal      | +/>+                                                                                        | +    | 102  | 13 | 1 | 65,000   | 4.81                       | 0.78 |      |
|         | 3            | Plain         | +/>+                                                                                        | +    | 91   | 16 | 0 | 80,000   | 4.90                       | 0.78 |      |
|         |              | Charcoal      | +/>+                                                                                        | +    | 115  | 15 | 0 | 75,000   | 4.88                       | 0.78 |      |
|         | 4            | Plain         | +/>+                                                                                        | +    | 77   | 3  | 0 | 38,500   | 4.59                       | 0.78 |      |
|         |              | Charcoal      | +/>+                                                                                        | +    | 134  | 13 | 2 | 65,000   | 4.81                       | 0.78 |      |
|         | 5            | Plain         | +/>+                                                                                        | +    | 70   | 10 | 0 | 35,000   | 4.54                       | 0.78 |      |
|         |              | Charcoal      | +/>+                                                                                        | +    | 104  | 13 | 2 | 65,000   | 4.81                       | 0.78 |      |
|         | RHZEC        | 1             | Plain (BD)                                                                                  | ---  | +    | 33 | 4 | 0        | 16,500                     | 4.22 | 1.71 |
|         |              |               | Charcoal (BD)                                                                               | ---  | +    | 48 | 3 | 0        | 24,000                     | 4.38 | 1.71 |
|         |              |               | Plain                                                                                       | +    | ~200 | 17 | 0 | 0        | 8,500                      | 3.93 | 0.78 |
|         |              |               | Charcoal                                                                                    | +/>+ | ~250 | 22 | 1 | 0        | 11,000                     | 4.04 | 0.78 |
| 2       |              | Plain         | +                                                                                           | ~200 | 13   | 2  | 0 | 6,500    | 3.81                       | 0.78 |      |
|         |              | Charcoal      | +/>+                                                                                        | ~250 | 25   | 1  | 0 | 12,500   | 4.10                       | 0.78 |      |
| 3       |              | Plain         | ~100                                                                                        | ~150 | 17   | 0  | 0 | 8,500    | 3.93                       | 0.78 |      |
|         |              | Charcoal      | +/>+                                                                                        | ~150 | 14   | 1  | 0 | 7,000    | 3.85                       | 0.78 |      |
| 4       |              | Plain         | +                                                                                           | ~200 | 15   | 0  | 0 | 7,500    | 3.88                       | 0.78 |      |
|         |              | Charcoal      | +/>+                                                                                        | ~200 | 25   | 0  | 0 | 12,500   | 4.10                       | 0.78 |      |
| 5       |              | Plain         | ~100                                                                                        | ~250 | 38   | 3  | 0 | 19,000   | 4.28                       | 0.78 |      |
|         |              | Charcoal      | +/>+                                                                                        | ~250 | 25   | 1  | 0 | 12,500   | 4.10                       | 0.78 |      |
| PHZE    |              | 1             | Plain (BD)                                                                                  | ---  | 19   | 2  | 0 | 0        | 950                        | 2.98 | 1.71 |
|         |              |               | Charcoal (BD)                                                                               | ---  | 62   | 11 | 0 | 0        | 3,100                      | 3.49 | 1.71 |
|         |              |               | Plain                                                                                       | 0    | 11   | 0  | 0 | 0        | 550                        | 2.74 | 0.78 |
|         |              |               | Charcoal                                                                                    | +    | 44   | 6  | 0 | 0        | 2,200                      | 3.34 | 0.78 |
|         | 2            | Plain         | 3                                                                                           | 38   | 9    | 1  | 0 | 1,900    | 3.28                       | 0.78 |      |
|         |              | Charcoal      | +                                                                                           | 75   | 11   | 0  | 0 | 3,750    | 3.57                       | 0.78 |      |
|         | 3            | Plain         | 3                                                                                           | 47   | 11   | 0  | 0 | 2,350    | 3.37                       | 0.78 |      |
|         |              | Charcoal      | +/>+                                                                                        | 105  | 12   | 0  | 0 | 6,000    | 3.78                       | 0.78 |      |
|         | 4            | Plain         | 8                                                                                           | 48   | 10   | 0  | 0 | 2,400    | 3.38                       | 0.78 |      |
|         |              | Charcoal      | +/>+                                                                                        | 106  | 13   | 1  | 0 | 6,500    | 3.81                       | 0.78 |      |
|         | 5            | Plain         | 0                                                                                           | 15   | 7    | 0  | 0 | 750      | 2.88                       | 0.78 |      |
|         |              | Charcoal      | +                                                                                           | 40   | 9    | 1  | 0 | 2,000    | 3.30                       | 0.78 |      |
|         | PHZEC        | 1             | Plain (BD)                                                                                  | ---  | 7    | 0  | 1 | 0        | 350                        | 2.55 | 1.71 |
|         |              |               | Charcoal (BD)                                                                               | ---  | 17   | 0  | 0 | 0        | 850                        | 2.93 | 1.71 |
|         |              |               | Plain                                                                                       | 0    | 5    | 1  | 0 | 0        | 250                        | 2.40 | 0.78 |
|         |              |               | Charcoal                                                                                    | 118  | 6    | 0  | 0 | 0        | 300                        | 2.48 | 0.78 |
| 2       |              | Plain         | 0                                                                                           | 0    | 0    | 0  | 0 | 0        | 0                          | 0.78 |      |
|         |              | Charcoal      | 55                                                                                          | 7    | 2    | 0  | 0 | 350      | 2.55                       | 0.78 |      |
| 3       |              | Plain         | 0                                                                                           | 0    | 1    | 1  | 0 | 500      | 2.70                       | 0.78 |      |
|         |              | Charcoal      | 112                                                                                         | 6    | 1    | 0  | 1 | 300      | 2.48                       | 0.78 |      |
| 4       |              | Plain         | 0                                                                                           | 1    | 0    | 0  | 0 | 50       | 1.71                       | 0.78 |      |
|         |              | Charcoal      | 32                                                                                          | 1    | 0    | 0  | 0 | 160      | 2.21                       | 0.78 |      |
| 5       |              | Plain         | 0                                                                                           | 2    | 1    | 0  | 0 | 100      | 2.00                       | 0.78 |      |
|         |              | Charcoal      | 76                                                                                          | 8    | 0    | 0  | 0 | 380      | 2.58                       | 0.78 |      |

LLOD, lower limit of detection in log<sub>10</sub> CFU/lung. ++ indicates non-uniform confluent growth. + indicates individual colonies too numerous to accurately count. ~ indicates that an accurate CFU count could not be obtained due to some merged/touching colonies. --- indicates not determined.

Table S4

**Table S5. BALB/c lung CFU count data used to calculate CFU/lung after 6 weeks of treatment.** Lung homogenates and cognate 10-fold dilutions (0.5 mL volume) were cultured on selective 7H11 agar ("plain" agar) and selective 7H11 agar supplemented with 0.4% activated charcoal. All 7H11 agar powder was manufactured by Remel Microbiology Products. The lower limit of detection was 0.78 log<sub>10</sub> CFU/lung per agar type.

| Regimen | BALB/c mouse | Agar type | CFU counts for the following 10-fold dilutions:<br>(shaded cell used to calculate CFU/lung) |             |    |   | CFU/lung | Log <sub>10</sub> CFU/lung |
|---------|--------------|-----------|---------------------------------------------------------------------------------------------|-------------|----|---|----------|----------------------------|
|         |              |           | 0                                                                                           | 1           | 2  | 3 |          |                            |
| RHZE    | 1            | Plain     | +                                                                                           | 79          | 8  | 1 | 3,950    | 3.60                       |
|         |              | Charcoal  | +                                                                                           | 57          | 2  | 0 | 2,850    | 3.45                       |
|         | 2            | Plain     | +                                                                                           | ~220        | 23 | 3 | 11,500   | 4.06                       |
|         |              | Charcoal  | +                                                                                           | ~250        | 23 | 1 | 11,500   | 4.06                       |
|         | 3            | Plain     | +/++                                                                                        | ~250        | 37 | 5 | 18,500   | 4.27                       |
|         |              | Charcoal  | +                                                                                           | ~230        | 27 | 5 | 13,500   | 4.13                       |
|         | 4            | Plain     | +                                                                                           | ~135        | 17 | 0 | 8,500    | 3.93                       |
|         |              | Charcoal  | +                                                                                           | ~140        | 12 | 0 | 6,000    | 3.78                       |
|         | 5            | Plain     | +                                                                                           | ~155        | 17 | 3 | 8,500    | 3.93                       |
|         |              | Charcoal  | +                                                                                           | ~115        | 11 | 2 | 5,500    | 3.74                       |
| RHZEC   | 1            | Plain     | 0                                                                                           | 21          | 2  | 0 | 1,050    | 3.02                       |
|         |              | Charcoal  | +                                                                                           | 27          | 1  | 0 | 1,350    | 3.13                       |
|         | 2            | Plain     | 5                                                                                           | 51          | 6  | 1 | 2,550    | 3.41                       |
|         |              | Charcoal  | +                                                                                           | 47          | 4  | 0 | 2,350    | 3.37                       |
|         | 3            | Plain     | 0                                                                                           | 12          | 2  | 0 | 600      | 2.78                       |
|         |              | Charcoal  | +                                                                                           | 19          | 2  | 0 | 950      | 2.98                       |
|         | 4            | Plain     | 55                                                                                          | 21          | 3  | 1 | 1,050    | 3.02                       |
|         |              | Charcoal  | +/++                                                                                        | 23          | 2  | 0 | 1,150    | 3.06                       |
|         | 5            | Plain     | 12                                                                                          | 40          | 4  | 0 | 2,000    | 3.30                       |
|         |              | Charcoal  | +                                                                                           | 36          | 3  | 0 | 1,800    | 3.26                       |
| PHZE    | 1            | Plain     | 2                                                                                           | 1           | 0  | 0 | 10       | 1.04                       |
|         |              | Charcoal  | 17                                                                                          | 2           | 0  | 0 | 85       | 1.93                       |
|         | 2            | Plain     | 0                                                                                           | 0           | 0  | 0 | 0        | 0                          |
|         |              | Charcoal  | 6                                                                                           | 0           | 0  | 0 | 30       | 1.49                       |
|         | 3            | Plain     | 1                                                                                           | 3           | 0  | 0 | 150      | 2.18                       |
|         |              | Charcoal  | 30                                                                                          | 2           | 1  | 0 | 150      | 2.18                       |
|         | 4            | Plain     | 0                                                                                           | 0           | 0  | 0 | 0        | 0                          |
|         |              | Charcoal  | 20                                                                                          | 2           | 0  | 0 | 100      | 2.00                       |
|         | 5            | Plain     | 1                                                                                           | 0           | 0  | 0 | 5        | 0.78                       |
|         |              | Charcoal  | 4 (Contam.)                                                                                 | 0 (Contam.) | 0  | 0 | 20       | 1.32                       |
| PHZEC   | 1            | Plain     | 0                                                                                           | 0           | 0  | 0 | 0        | 0                          |
|         |              | Charcoal  | 0                                                                                           | 0           | 0  | 0 | 0        | 0                          |
|         | 2            | Plain     | 0                                                                                           | 0           | 0  | 0 | 0        | 0                          |
|         |              | Charcoal  | 0                                                                                           | 0           | 0  | 0 | 0        | 0                          |
|         | 3            | Plain     | 0                                                                                           | 0           | 0  | 0 | 0        | 0                          |
|         |              | Charcoal  | 4                                                                                           | 0           | 0  | 0 | 20       | 1.32                       |
|         | 4            | Plain     | 0                                                                                           | 0           | 0  | 0 | 0        | 0                          |
|         |              | Charcoal  | 1                                                                                           | 0           | 0  | 0 | 5        | 0.78                       |
|         | 5            | Plain     | 0                                                                                           | 0           | 0  | 0 | 0        | 0                          |
|         |              | Charcoal  | 3                                                                                           | 1           | 0  | 0 | 15       | 1.20                       |

++ indicates non-uniform confluent growth. + indicates individual colonies too numerous to accurately count. ~ indicates that an accurate CFU count could not be obtained due to some merged/touching colonies. Contam. indicates fungal or bacterial contamination was observed on the agar.

Table S5

**Table S6. BALB/c lung CFU count data used to calculate CFU/lung after 8 weeks of treatment.** Undiluted lung homogenates were cultured on selective 7H11 agar supplemented with 0.4% activated charcoal (five agar plates per sample, 0.5 mL homogenate per plate). All 7H11 agar powder was manufactured by Remel Microbiology Products. The lower limit of detection was 0.30 log<sub>10</sub> CFU/lung per sample.

| Regimen | BALB/c mouse | Agar type | CFU counts from undiluted lung homogenate<br>(total on five plates used to calculate CFU/lung): |         |         |         |         | CFU/lung | Log <sub>10</sub><br>CFU/lung |
|---------|--------------|-----------|-------------------------------------------------------------------------------------------------|---------|---------|---------|---------|----------|-------------------------------|
|         |              |           | Plate 1                                                                                         | Plate 2 | Plate 3 | Plate 4 | Plate 5 |          |                               |
| RHZE    | 1            | Charcoal  | 111                                                                                             | 107     | 131     | 94      | 73      | 516      | 2.71                          |
|         | 2            | Charcoal  | 60                                                                                              | 55      | 77      | 60      | 27      | 279      | 2.45                          |
|         | 3            | Charcoal  | 140                                                                                             | 142     | 135     | 121     | 71      | 609      | 2.79                          |
|         | 4            | Charcoal  | 92                                                                                              | 93      | 79      | 83      | 44      | 391      | 2.59                          |
|         | 5            | Charcoal  | 93                                                                                              | 78      | 68      | 78      | 61      | 378      | 2.58                          |
| RHZEC   | 1            | Charcoal  | 46                                                                                              | 32      | 43      | 28      | 33      | 182      | 2.26                          |
|         | 2            | Charcoal  | 6                                                                                               | 1       | 7       | 7       | 10      | 31       | 1.51                          |
|         | 3            | Charcoal  | 14                                                                                              | 7       | 13      | 6       | 13      | 53       | 1.73                          |
|         | 4            | Charcoal  | 7                                                                                               | 9       | 5       | 10      | 15      | 46       | 1.67                          |
|         | 5            | Charcoal  | 10                                                                                              | 9       | 3       | 9       | 6       | 37       | 1.58                          |
| PHZE    | 1            | Charcoal  | 0                                                                                               | 3       | 0       | 0       | 0       | 3        | 0.60                          |
|         | 2            | Charcoal  | 1                                                                                               | 0       | 0       | 0       | 0       | 1        | 0.30                          |
|         | 3            | Charcoal  | 1                                                                                               | 0       | 0       | 0       | 0       | 1        | 0.30                          |
|         | 4            | Charcoal  | 0                                                                                               | 0       | 1       | 0       | 0       | 1        | 0.30                          |
|         | 5            | Charcoal  | 1                                                                                               | 0       | 0       | 0       | 0       | 1        | 0.30                          |
| PHZEC   | 1            | Charcoal  | 0                                                                                               | 0       | 0       | 0       | 0       | 0        | 0                             |
|         | 2            | Charcoal  | 0                                                                                               | 0       | 0       | 0       | 0       | 0        | 0                             |
|         | 3            | Charcoal  | 0                                                                                               | 0       | 0       | 0       | 0       | 0        | 0                             |
|         | 4            | Charcoal  | 0                                                                                               | 0       | 0       | 0       | 0       | 0        | 0                             |
|         | 5            | Charcoal  | 0                                                                                               | 0       | 0       | 0       | 0       | 0        | 0                             |

Table S6

**Table S7. BALB/c lung CFU count data used to calculate CFU/lung after 10 weeks of treatment.** Undiluted lung homogenates were cultured on selective 7H11 agar supplemented with 0.4% activated charcoal (five agar plates per sample, 0.5 mL homogenate per plate). All 7H11 agar powder was manufactured by Remel Microbiology Products. The lower limit of detection was 0.30 log<sub>10</sub> CFU/lung per sample.

| Regimen | BALB/c mouse | CFU counts from undiluted lung homogenate<br>(total on five plates used to calculate CFU/lung): |           |           |           |           | CFU/lung | Log <sub>10</sub><br>CFU/lung |
|---------|--------------|-------------------------------------------------------------------------------------------------|-----------|-----------|-----------|-----------|----------|-------------------------------|
|         |              | Plate 1                                                                                         | Plate 2   | Plate 3   | Plate 4   | Plate 5   |          |                               |
| RHZE    | 1            | 10                                                                                              | 6         | 6         | 4         | 2         | 28       | 1.46                          |
|         | 2            | 20                                                                                              | 17        | 17        | 21        | 7         | 82       | 1.92                          |
|         | 3            | 12                                                                                              | 14        | 19        | 18        | 2         | 65       | 1.82                          |
|         | 4            | 14                                                                                              | 18        | 5         | 12        | 10        | 59       | 1.78                          |
|         | 5            | 9                                                                                               | 4         | 5         | 4         | 2         | 24       | 1.40                          |
| RHZEC   | 1            | 0                                                                                               | 0         | 0         | 2         | 0         | 2        | 0.48                          |
|         | 2            | 0                                                                                               | 0         | 0         | 0         | 0         | 0        | 0                             |
|         | 3            | 0                                                                                               | 0         | 0         | 0         | 0         | 0        | 0                             |
|         | 4            | 1                                                                                               | 0         | 0         | 1         | 0         | 2        | 0.48                          |
|         | 5            | 1                                                                                               | 0         | 0         | 0         | 1         | 2        | 0.48                          |
| PHZE    | 1            | 0                                                                                               | 0         | 0         | 0         | 0         | 0        | 0                             |
|         | 2            | 0                                                                                               | 0         | 1         | 0         | 0         | 1        | 0.30                          |
|         | 3            | 0                                                                                               | 0         | 0         | 0         | 0         | 0        | 0                             |
|         | 4            | 0                                                                                               | 0         | 0         | 0         | 0         | 0        | 0                             |
|         | 5            | 0                                                                                               | 0         | 0         | 0         | 0         | 0        | 0                             |
| PHZEC   | 1            | 0                                                                                               | 0         | 0         | 0         | 0         | 0        | 0                             |
|         | 2            | 0/Contam.                                                                                       | 0/Contam. | 0/Contam. | 0/Contam. | 0/Contam. | 0        | 0                             |
|         | 3            | 0                                                                                               | 0         | 0         | 0         | 0         | 0        | 0                             |
|         | 4            | 0                                                                                               | 0         | 0         | 0         | 0         | 0        | 0                             |
|         | 5            | 0                                                                                               | 0         | 0         | 0         | 0         | 0        | 0                             |

Contam. indicates fungal or bacterial contamination was observed on the agar. In this case, the contamination was in the form of a few discreet colonies that did not preclude reading the sample.

Table S7

**Table S8. BALB/c lung CFU count data used to calculate CFU/lung after 12 weeks of treatment.** Undiluted lung homogenates were cultured on selective 7H11 agar supplemented with 0.4% activated charcoal (five agar plates per sample, 0.5 mL homogenate per plate). All 7H11 agar powder was manufactured by Remel Microbiology Products. The lower limit of detection was 0.30 log<sub>10</sub> CFU/lung per sample.

| Regimen | BALB/c mouse | Agar type | CFU counts from undiluted lung homogenate<br>(total on five plates used to calculate CFU/lung): |         |         |         |         | CFU/lung | Log <sub>10</sub><br>CFU/lung |
|---------|--------------|-----------|-------------------------------------------------------------------------------------------------|---------|---------|---------|---------|----------|-------------------------------|
|         |              |           | Plate 1                                                                                         | Plate 2 | Plate 3 | Plate 4 | Plate 5 |          |                               |
| RHZE    | 1            | Charcoal  | 0                                                                                               | 2       | 3       | 1       | 0       | 6        | 0.85                          |
|         | 2            | Charcoal  | 0                                                                                               | 0       | 1       | 2       | 2       | 5        | 0.78                          |
|         | 3            | Charcoal  | 1                                                                                               | 2       | 0       | 1       | 1       | 5        | 0.78                          |
|         | 4            | Charcoal  | 1                                                                                               | 1       | 0       | 2       | 1       | 5        | 0.78                          |
|         | 5            | Charcoal  | 0                                                                                               | 0       | 0       | 1       | 0       | 1        | 0.30                          |
| RHZEC   | 1            | Charcoal  | 0                                                                                               | 0       | 0       | 0       | 0       | 0        | 0                             |
|         | 2            | Charcoal  | 0                                                                                               | 0       | 0       | 0       | 0       | 0        | 0                             |
|         | 3            | Charcoal  | 0                                                                                               | 0       | 0       | 0       | 0       | 0        | 0                             |
|         | 4            | Charcoal  | 0                                                                                               | 0       | 0       | 0       | 0       | 0        | 0                             |
|         | 5            | Charcoal  | 0                                                                                               | 0       | 0       | 0       | 0       | 0        | 0                             |
| PHZE    | 1            | Charcoal  | 0                                                                                               | 0       | 0       | 0       | 0       | 0        | 0                             |
|         | 2            | Charcoal  | 0                                                                                               | 0       | 0       | 0       | 0       | 0        | 0                             |
|         | 3            | Charcoal  | Contam.                                                                                         | Contam. | Contam. | Contam. | Contam. | ---      | ---                           |
|         | 4            | Charcoal  | 0                                                                                               | 0       | 0       | 0       | 0       | 0        | 0                             |
|         | 5            | Charcoal  | 0                                                                                               | 0       | 0       | 0       | 0       | 0        | 0                             |
| PHZEC   | 1            | Charcoal  | 0                                                                                               | 0       | 0       | 0       | 0       | 0        | 0                             |
|         | 2            | Charcoal  | 0                                                                                               | 0       | 0       | 0       | 0       | 0        | 0                             |
|         | 3            | Charcoal  | 0                                                                                               | 0       | 0       | 0       | 0       | 0        | 0                             |
|         | 4            | Charcoal  | 0                                                                                               | 0       | 0       | 0       | 0       | 0        | 0                             |
|         | 5            | Charcoal  | 0                                                                                               | 0       | 0       | 0       | 0       | 0        | 0                             |

Contam. indicates fungal or bacterial contamination was observed on the agar. In this case, the contamination covered the agar surface, preventing reading of the sample.

Table S8

**Table S9. Lung CFU data from BALB/c mice assessed for relapse after 6 weeks of treatment.** Mice were sacrificed 6 months after stopping treatment. Undiluted lung homogenates (2.25 mL homogenate over 4 agar plates) and cognate  $10^{-2}$  and  $10^{-4}$  dilutions (1 agar plate each, 0.5 mL per plate) were cultured on selective 7H11 agar supplemented with 0.4% activated charcoal. All 7H11 agar powder was manufactured by BD. The lower limit of detection was  $0.32 \log_{10}$  CFU/lung per sample.

| BALB/c mouse | CFU counts for the following dilutions:<br>(shaded cells used to approximate CFU/lung) |         |         |         |                              |                              | CFU/lung<br>(approximate) | Log <sub>10</sub> CFU/lung<br>(approximate) |
|--------------|----------------------------------------------------------------------------------------|---------|---------|---------|------------------------------|------------------------------|---------------------------|---------------------------------------------|
|              | Undiluted                                                                              |         |         |         | 10 <sup>-2</sup><br>dilution | 10 <sup>-4</sup><br>dilution |                           |                                             |
|              | Plate 1                                                                                | Plate 2 | Plate 3 | Plate 4 |                              |                              |                           |                                             |
| 1            | 0                                                                                      | 0       | 0       | 0       | 0                            | 0                            | 0                         | 0                                           |
| 2            | 0                                                                                      | 0       | 0       | 0       | 0                            | 0                            | 0                         | 0                                           |
| 3            | 24                                                                                     | 33      | 30      | 27      | 0                            | 0                            | 127                       | 2.11                                        |
| 4            | 0                                                                                      | 0       | 0       | 0       | 0                            | 0                            | 0                         | 0                                           |
| 5            | 0                                                                                      | 0       | 0       | 0       | 0                            | 0                            | 0                         | 0                                           |
| 6            | 0                                                                                      | 0       | 0       | 0       | 0                            | 0                            | 0                         | 0                                           |
| 7            | 0                                                                                      | 0       | 0       | 0       | 0                            | 0                            | 0                         | 0                                           |
| 8            | 0                                                                                      | 0       | 0       | 0       | 0                            | 0                            | 0                         | 0                                           |
| 9            | 0                                                                                      | 0       | 0       | 0       | 0                            | 0                            | 0                         | 0                                           |
| 10           | 0                                                                                      | 0       | 0       | 0       | 0                            | 0                            | 0                         | 0                                           |
| 11           | 0                                                                                      | 0       | 0       | 0       | 0                            | 0                            | 0                         | 0                                           |
| 12           | ~100                                                                                   | ~100    | ~100    | ~100    | 3                            | 0                            | 444                       | 2.65                                        |
| 13           | 0                                                                                      | 1       | 2       | 1       | 0                            | 0                            | 4                         | 0.74                                        |
| 14           | 7                                                                                      | 2       | 4       | 5       | 1                            | 0                            | 20                        | 1.32                                        |
| 15           | 0                                                                                      | 0       | 0       | 0       | 0                            | 0                            | 0                         | 0                                           |
| 16           | 0                                                                                      | 0       | 0       | 0       | 0                            | 0                            | 0                         | 0                                           |
| 17           | 0                                                                                      | 0       | 0       | 0       | 0                            | 0                            | 0                         | 0                                           |
| 18           | ~150                                                                                   | ~150    | ~150    | ~150    | 1                            | 0                            | 667                       | 2.82                                        |

~ indicates that an accurate CFU count could not be obtained due to some merged/touching colonies.

**Table S10. Lung CFU data from BALB/c mice assessed for relapse after 8 weeks of treatment.** Mice were sacrificed 6 months after stopping treatment. Undiluted lung homogenates (2.25 mL homogenate over 4 agar plates) and cognate 10<sup>-2</sup> and 10<sup>-4</sup> dilutions (1 agar plate each, 0.5 mL per plate) were cultured on selective 7H11 agar supplemented with 0.4% activated charcoal. All 7H11 agar powder was manufactured by BD. The lower limit of detection was 0.32 log<sub>10</sub> CFU/lung per sample.

| Regimen        | BALB/c mouse | CFU counts for the following dilutions:<br>(shaded cells used to approximate CFU/lung) |         |         |         |                              |                              | CFU/lung<br>(approximate) | Log <sub>10</sub> CFU/lung<br>(approximate) |
|----------------|--------------|----------------------------------------------------------------------------------------|---------|---------|---------|------------------------------|------------------------------|---------------------------|---------------------------------------------|
|                |              | Undiluted                                                                              |         |         |         | 10 <sup>-2</sup><br>dilution | 10 <sup>-4</sup><br>dilution |                           |                                             |
|                |              | Plate 1                                                                                | Plate 2 | Plate 3 | Plate 4 |                              |                              |                           |                                             |
| PHZE<br>(NOTE) | 1            | 0                                                                                      | 0       | 0       | 0       | 0                            | 0                            | 0                         | 0                                           |
|                | 2            | ~500                                                                                   | ~500    | ~500    | ~500    | 1                            | 0                            | 2,222                     | 3.35                                        |
|                | 3            | 0                                                                                      | 0       | 0       | 0       | 0                            | 0                            | 0                         | 0                                           |
|                | 4            | ~500                                                                                   | ~500    | ~500    | ~500    | 2                            | 0                            | 2,222                     | 3.35                                        |
|                | 5            | 0                                                                                      | 0       | 0       | 0       | 0                            | 0                            | 0                         | 0                                           |
|                | 6            | 0                                                                                      | 0       | 0       | 0       | 0                            | 0                            | 0                         | 0                                           |
|                | 7            | 0                                                                                      | 0       | 0       | 0       | 0                            | 0                            | 0                         | 0                                           |
|                | 8            | 83                                                                                     | 65      | 89      | 101     | 0                            | 0                            | 376                       | 2.58                                        |
|                | 9            | 0                                                                                      | 0       | 0       | 0       | 0                            | 0                            | 0                         | 0                                           |
|                | 10           | +                                                                                      | +       | +       | +       | 13                           | 0                            | 6,500                     | 3.81                                        |
|                | 11           | 0                                                                                      | 0       | 0       | 0       | 0                            | 0                            | 0                         | 0                                           |
|                | 12           | 0                                                                                      | 0       | 0       | 0       | 0                            | 0                            | 0                         | 0                                           |
|                | 13           | 0                                                                                      | 0       | 0       | 0       | 0                            | 0                            | 0                         | 0                                           |
|                | 14           | 0                                                                                      | 0       | 0       | 0       | 0                            | 0                            | 0                         | 0                                           |
|                | 15           | 0                                                                                      | 0       | 0       | 0       | 0                            | 0                            | 0                         | 0                                           |
|                | 16           | 0                                                                                      | 0       | 0       | 0       | 0                            | 0                            | 0                         | 0.00                                        |
|                | 17           | ~200                                                                                   | ~200    | ~200    | ~200    | 2                            | 0                            | 889                       | 2.95                                        |
|                | 18           | 0                                                                                      | 0       | 0       | 0       | 0                            | 0                            | 0                         | 0                                           |
|                | 19           | +                                                                                      | +       | +       | +       | 36                           | 1                            | 18,000                    | 4.26                                        |
|                | 20           | 0                                                                                      | 0       | 0       | 0       | 0                            | 0                            | 0                         | 0                                           |
| PHZEC          | 1-6          | 0                                                                                      | 0       | 0       | 0       | 0                            | 0                            | 0                         | 0                                           |
|                | 7            | 0                                                                                      | 0       | 0       | 0       | 0/Contam.                    | 0                            | 0                         | 0                                           |
|                | 8-18         | 0                                                                                      | 0       | 0       | 0       | 0                            | 0                            | 0                         | 0                                           |

+ indicates individual colonies too numerous to accurately count. ~ indicates that an accurate CFU count could not be obtained due to some merged/ touching colonies. Contam. indicates fungal or bacterial contamination was observed on the agar. In this case, the contamination was in the form of a few discreet colonies that did not preclude reading the sample. **NOTE:** According to the original experiment design (Table 1 in the main text), this group should have included 18 mice; however, an additional two mice were accidentally included in the group of mice withdrawn from treatment at Week 8.

Table S10

**Table S11. Lung CFU data from BALB/c mice assessed for relapse after 10 weeks of treatment.** Mice were sacrificed 6 months after stopping treatment. Undiluted lung homogenates (2.25 mL homogenate over 4 agar plates) and cognate 10<sup>-2</sup> and 10<sup>-4</sup> dilutions (1 agar plate each, 0.5 mL per plate) were cultured on selective 7H11 agar supplemented with 0.4% activated charcoal. All 7H11 agar powder was manufactured by BD. The lower limit of detection was 0.32 log<sub>10</sub> CFU/lung per sample.

| Regimen | BALB/c mouse | CFU counts for the following dilutions:<br>(shaded cells used to approximate CFU/lung) |         |         |         |                              |                              | CFU/lung<br>(approximate) | Log <sub>10</sub> CFU/lung<br>(approximate) |
|---------|--------------|----------------------------------------------------------------------------------------|---------|---------|---------|------------------------------|------------------------------|---------------------------|---------------------------------------------|
|         |              | Undiluted                                                                              |         |         |         | 10 <sup>-2</sup><br>dilution | 10 <sup>-4</sup><br>dilution |                           |                                             |
|         |              | Plate 1                                                                                | Plate 2 | Plate 3 | Plate 4 |                              |                              |                           |                                             |
| RHZEC   | 1            | +                                                                                      | +       | +       | +       | 24                           | 0                            | 12,000                    | 4.08                                        |
|         | 2            | 0                                                                                      | 0       | 0       | 0       | 0                            | 0                            | 0                         | 0                                           |
|         | 3            | 108                                                                                    | 97      | 79      | 97      | 0                            | 0                            | 423                       | 2.63                                        |
|         | 4            | +                                                                                      | +       | +       | +       | 14                           | 0                            | 7,000                     | 3.85                                        |
|         | 5            | +                                                                                      | +       | +       | +       | 8                            | 0                            | 4,000                     | 3.60                                        |
|         | 6            | 0                                                                                      | 0       | 0       | 0       | 0                            | 0                            | 0                         | 0                                           |
|         | 7            | ~300                                                                                   | ~300    | ~300    | ~300    | 1                            | 0                            | 1,333                     | 3.13                                        |
|         | 8            | +                                                                                      | +       | +       | +       | 22                           | 0                            | 11,000                    | 4.04                                        |
|         | 9            | 0                                                                                      | 0       | 0       | 0       | 0                            | 0                            | 0                         | 0                                           |
|         | 10           | 0                                                                                      | 0       | 0       | 0       | 0                            | 0                            | 0                         | 0                                           |
|         | 11           | +                                                                                      | +       | +       | +       | 12                           | 0                            | 6,000                     | 3.78                                        |
|         | 12           | +                                                                                      | +       | +       | +       | 22                           | 0                            | 11,000                    | 4.04                                        |
|         | 13           | +/++                                                                                   | +/++    | +/++    | +/++    | 43                           | 0                            | 21,500                    | 4.33                                        |
|         | 14           | 0                                                                                      | 0       | 0       | 0       | 0                            | 0                            | 0                         | 0.00                                        |
|         | 15           | 0/Contam.                                                                              | 0       | 0       | 0       | 0                            | 0                            | 0                         | 0.00                                        |
|         | 16           | 0                                                                                      | 0       | 0       | 0       | 0                            | 0                            | 0                         | 0.00                                        |
|         | 17           | 5                                                                                      | 8       | 6       | 2       | 0                            | 0                            | 23                        | 1.39                                        |
|         | 18           | 0                                                                                      | 0       | 0       | 0       | 0                            | 0                            | 0                         | 0.00                                        |
| PHZE    | 1-12         | 0                                                                                      | 0       | 0       | 0       | 0                            | 0                            | 0                         | 0                                           |
|         | 13           | ~300                                                                                   | ~300    | ~300    | ~300    | 1                            | 0                            | 1,333                     | 3.13                                        |
|         | 14-18        | 0                                                                                      | 0       | 0       | 0       | 0                            | 0                            | 0                         | 0                                           |
| PHZEC   | 1-5          | 0                                                                                      | 0       | 0       | 0       | 0                            | 0                            | 0                         | 0                                           |
|         | 6            | 36                                                                                     | 23      | 32      | 36      | 0                            | 0                            | 141                       | 2.15                                        |
|         | 7            | 0                                                                                      | 0       | 0       | 1       | 0                            | 0                            | 1                         | 0.32                                        |
|         | 8-18         | 0                                                                                      | 0       | 0       | 0       | 0                            | 0                            | 0                         | 0                                           |

++ indicates non-uniform confluent growth. + indicates individual colonies too numerous to accurately count. ~ indicates that an accurate CFU count could not be obtained due to some merged/touching colonies. Contam. indicates fungal or bacterial contamination was observed on the agar. In this case, the contamination was in the form of a few discreet colonies that did not preclude reading the sample.

Table S11



**Table S12. Lung CFU data from BALB/c mice assessed for relapse after 12 weeks of treatment.** Mice were sacrificed 6 months after stopping treatment. Undiluted lung homogenates (2.25 mL homogenate over 4 agar plates) and cognate 10<sup>-2</sup> and 10<sup>-4</sup> dilutions (1 agar plate each, 0.5 mL per plate) were cultured on selective 7H11 agar supplemented with 0.4% activated charcoal. All 7H11 agar powder was manufactured by BD. The lower limit of detection was 0.32 log<sub>10</sub> CFU/lung per sample.

| Regimen        | BALB/c mouse | CFU counts for the following dilutions:<br>(shaded cells used to approximate CFU/lung) |         |         |         |                              |                              | CFU/lung<br>(approximate) | Log <sub>10</sub> CFU/lung<br>(approximate) |
|----------------|--------------|----------------------------------------------------------------------------------------|---------|---------|---------|------------------------------|------------------------------|---------------------------|---------------------------------------------|
|                |              | Undiluted                                                                              |         |         |         | 10 <sup>-2</sup><br>dilution | 10 <sup>-4</sup><br>dilution |                           |                                             |
|                |              | Plate 1                                                                                | Plate 2 | Plate 3 | Plate 4 |                              |                              |                           |                                             |
| RHZE           | 1*           | ~500                                                                                   | ~500    | ~500    | ~500    | ---                          | ---                          | 2,500                     | 3.40                                        |
|                | 2            | +                                                                                      | +       | +       | +       | 18                           | 1                            | 9,000                     | 3.95                                        |
|                | 3            | +                                                                                      | +       | +       | +       | 42                           | 0                            | 21,000                    | 4.32                                        |
|                | 4            | +                                                                                      | +       | +       | +       | 18                           | 0                            | 9,000                     | 3.95                                        |
|                | 5            | +                                                                                      | +       | +       | +       | 13                           | 0                            | 6,500                     | 3.81                                        |
|                | 6            | +                                                                                      | +       | +       | +       | 12                           | 0                            | 6,000                     | 3.78                                        |
|                | 7            | 0                                                                                      | 0       | 0       | 0       | 0                            | 0                            | 0                         | 0                                           |
|                | 8            | +                                                                                      | +       | +       | +       | 15                           | 0                            | 7,500                     | 3.88                                        |
|                | 9            | ++                                                                                     | ++      | ++      | ++      | ~300                         | 1                            | 150,000                   | 5.18                                        |
|                | 10           | ++/+++                                                                                 | ++/+++  | ++/+++  | ++/+++  | ~500                         | 4                            | 200,000                   | 5.30                                        |
|                | 11           | +                                                                                      | +       | +       | +       | 28                           | 0                            | 14,000                    | 4.15                                        |
|                | 12           | +                                                                                      | +       | +       | +       | 30                           | 0                            | 15,000                    | 4.18                                        |
|                | 13           | +                                                                                      | +       | +       | +       | 16                           | 0                            | 8,000                     | 3.90                                        |
|                | 14           | +/++                                                                                   | +/++    | +/++    | +/++    | 48                           | 0                            | 24,000                    | 4.38                                        |
|                | 15           | +                                                                                      | +       | +       | +       | 16                           | 0                            | 8,000                     | 3.90                                        |
|                | 16           | ++                                                                                     | ++      | ++      | ++      | 135                          | 0                            | 67,500                    | 4.83                                        |
|                | 17           | ~500                                                                                   | ~500    | ~500    | ~500    | 5                            | 0                            | 2,500                     | 3.40                                        |
|                | 18           | +                                                                                      | +       | +       | +       | 32                           | 0                            | 16,000                    | 4.20                                        |
|                | 19           | +/++                                                                                   | +/++    | +/++    | +/++    | 52                           | 2                            | 26,000                    | 4.41                                        |
|                | 20           | ++                                                                                     | ++      | ++      | ++      | ~200                         | 4                            | 200,000                   | 5.30                                        |
| RHZEC          | 1-20         | 0                                                                                      | 0       | 0       | 0       | 0                            | 0                            | 0                         | 0                                           |
| PHZE<br>(NOTE) | 1-18         | 0                                                                                      | 0       | 0       | 0       | 0                            | 0                            | 0                         | 0                                           |
| PHZEC          | 1-20         | 0                                                                                      | 0       | 0       | 0       | 0                            | 0                            | 0                         | 0                                           |

+++ indicates uniform confluent growth. ++ indicates non-uniform confluent growth. + indicates individual colonies too numerous to accurately count. ~ indicates that an accurate CFU count could not be obtained due to some merged/touching colonies. --- indicates not determined. \*One month after stopping treatment, this mouse was euthanized due to illness. **NOTE:** According to the original experiment design (Table 1 in the main text), this group should have included 20 mice; however, an additional two mice were accidentally included in the group of mice withdrawn from treatment at Week 8. Therefore, only 18 mice were remaining in this relapse group.

Table S12

**Table S13. C3HeB/FeJ lung CFU count data used to calculate CFU/lung 3 weeks after infection (Week -3) and on the day of treatment initiation (Day 0).** Lung homogenates and cognate 10-fold dilutions (0.5 mL volume) were cultured on selective 7H11 agar ("plain" agar) and selective 7H11 agar supplemented with 0.4% activated charcoal. All 7H11 agar powder was manufactured by BD. The lower limit of detection was 0.78 log<sub>10</sub> CFU/lung per agar type.

| Time point | Aerosol infection run | C3HeB/FeJ mouse | Agar type | CFU counts for the following 10-fold dilutions:<br>(shaded cell used to calculate CFU/lung) |        |        |      |      |      |            | CFU/lung    | Log <sub>10</sub> CFU/lung |      |
|------------|-----------------------|-----------------|-----------|---------------------------------------------------------------------------------------------|--------|--------|------|------|------|------------|-------------|----------------------------|------|
|            |                       |                 |           | 0                                                                                           | 1      | 2      | 3    | 4    | 5    | 6          |             |                            | 7    |
| Week -3    | Run 1                 | 1               | Plain     | +++                                                                                         | +++    | ++/+++ | ~300 | 58   | 5    | ---        | ---         | 2,900,000                  | 6.46 |
|            |                       |                 | Charcoal  | +++                                                                                         | +++    | ++/+++ | ~300 | 49   | 2    | ---        | ---         | 2,450,000                  | 6.39 |
|            |                       | 2               | Plain     | +++                                                                                         | +++    | ++/+++ | ~400 | 22   | 4    | ---        | ---         | 1,100,000                  | 6.04 |
|            |                       |                 | Charcoal  | ++/+++                                                                                      | +++    | ++/+++ | ~400 | 31   | 0    | ---        | ---         | 1,550,000                  | 6.19 |
|            |                       | 3               | Plain     | ++/+++                                                                                      | ++     | +      | ~150 | 8    | 0    | ---        | ---         | 400,000                    | 5.60 |
|            |                       |                 | Charcoal  | +++                                                                                         | ++     | +      | ~150 | 15   | 1    | ---        | ---         | 750,000                    | 5.88 |
|            | Run 2                 | 4               | Plain     | +++                                                                                         | ++/+++ | ++     | ~700 | 77   | 7    | ---        | ---         | 3,850,000                  | 6.59 |
|            |                       |                 | Charcoal  | +++                                                                                         | ++/+++ | ++     | ~700 | 53   | 8    | ---        | ---         | 2,650,000                  | 6.42 |
|            |                       | 5               | Plain     | +++                                                                                         | ++/+++ | +/++   | ~400 | 41   | 6    | ---        | ---         | 2,050,000                  | 6.31 |
|            |                       |                 | Charcoal  | +++                                                                                         | ++/+++ | +/++   | ~400 | 36   | 2    | ---        | ---         | 1,800,000                  | 6.26 |
|            |                       | 6               | Plain     | +++                                                                                         | ++/+++ | +/++   | ~600 | 70   | 10   | ---        | ---         | 3,500,000                  | 6.54 |
|            |                       |                 | Charcoal  | +++                                                                                         | ++/+++ | +/++   | ~600 | 79   | 11   | ---        | ---         | 3,950,000                  | 6.60 |
| Run 3      | 7                     | Plain           | +++       | +++                                                                                         | +/++   | ~800   | 92   | 7    | ---  | ---        | 4,600,000   | 6.66                       |      |
|            |                       | Charcoal        | +++       | +++                                                                                         | +/++   | ~800   | 97   | 3    | ---  | ---        | 4,850,000   | 6.69                       |      |
|            | 8                     | Plain           | +++       | ++/+++                                                                                      | +/++   | ~800   | 100  | 1    | ---  | ---        | 5,000,000   | 6.70                       |      |
|            |                       | Charcoal        | +++       | ++/+++                                                                                      | +/++   | ~800   | 96   | 6    | ---  | ---        | 4,800,000   | 6.68                       |      |
| 9          | Plain                 | +++             | ++/+++    | +/++                                                                                        | ~500   | 33     | 5    | ---  | ---  | 1,650,000  | 6.22        |                            |      |
|            | Charcoal              | +++             | ++/+++    | +/++                                                                                        | ~500   | 37     | 2    | ---  | ---  | 1,850,000  | 6.27        |                            |      |
| Run 4      | 10                    | Plain           | +++       | ++/+++                                                                                      | ++     | ~500   | 61   | 4    | ---  | ---        | 3,050,000   | 6.48                       |      |
|            |                       | Charcoal        | +++       | ++/+++                                                                                      | +/++   | ~500   | 64   | 12   | ---  | ---        | 3,200,000   | 6.51                       |      |
|            | 11                    | Plain           | +++       | ++/+++                                                                                      | +/++   | ~300   | 20   | 1    | ---  | ---        | 1,000,000   | 6.00                       |      |
|            |                       | Charcoal        | +++       | ++/+++                                                                                      | +/++   | ~300   | 25   | 3    | ---  | ---        | 1,250,000   | 6.10                       |      |
| 12         | Plain                 | +++             | +++       | ++                                                                                          | ~350   | 55     | 11   | ---  | ---  | 2,750,000  | 6.44        |                            |      |
|            | Charcoal              | +++             | +++       | +/++                                                                                        | ~350   | 45     | 4    | ---  | ---  | 2,250,000  | 6.35        |                            |      |
| Day 0      | Run 1                 | 1               | Plain     | +++                                                                                         | +++    | ++/+++ | ++   | +    | ~250 | 43         | 2           | 215,000,000                | 8.33 |
|            |                       |                 | Charcoal  | +++                                                                                         | +++    | ++/+++ | ++   | +    | ~300 | 38         | 2           | 190,000,000                | 8.28 |
|            |                       | 2               | Plain     | +++                                                                                         | ++/+++ | ++     | +    | ~180 | 17   | 2          | 0           | 8,500,000                  | 6.93 |
|            |                       |                 | Charcoal  | +++                                                                                         | ++/+++ | ++     | +    | ---  | 17   | 1          | 0           | 8,500,000                  | 6.93 |
|            |                       | 3               | Plain     | +++                                                                                         | +++    | ++/+++ | +/++ | ~200 | 39   | 9          | 0           | 19,500,000                 | 7.29 |
|            |                       |                 | Charcoal  | +++                                                                                         | +++    | ++/+++ | +/++ | ---  | 42   | 6          | 0           | 21,000,000                 | 7.32 |
|            | Run 2                 | 4               | Plain     | +++                                                                                         | +++    | ++/+++ | +/++ | ~250 | 44   | 5          | 0           | 22,000,000                 | 7.34 |
|            |                       |                 | Charcoal  | +++                                                                                         | +++    | ++/+++ | +/++ | ~250 | 57   | 3          | 0           | 28,500,000                 | 7.45 |
|            |                       | 5               | Plain     | +++                                                                                         | +++    | ++/+++ | +    | ~150 | 19   | 3          | 0           | 9,500,000                  | 6.98 |
|            |                       |                 | Charcoal  | +++                                                                                         | +++    | ++/+++ | +    | ~145 | 10   | 0          | 0           | 5,000,000                  | 6.70 |
|            | 6                     | Plain           | +++       | +++                                                                                         | +++    | ++     | +/++ | +    | 34   | 9          | 170,000,000 | 8.23                       |      |
|            |                       | Charcoal        | +++       | +++                                                                                         | +++    | ++     | +/++ | +    | 65   | 6          | 325,000,000 | 8.51                       |      |
| Run 3      | 7                     | Plain           | +++       | +++                                                                                         | +++    | ++/+++ | +/++ | +    | 128  | 12         | 600,000,000 | 8.78                       |      |
|            |                       | Charcoal        | +++       | +++                                                                                         | +++    | ++/+++ | +/++ | +    | 67   | 7          | 335,000,000 | 8.53                       |      |
|            | 8                     | Plain           | +++       | +++                                                                                         | ++/+++ | +/++   | ~200 | 24   | 3    | 0          | 12,000,000  | 7.08                       |      |
|            |                       | Charcoal        | +++       | +++                                                                                         | ++/+++ | +/++   | ~200 | 13   | 3    | 0          | 6,500,000   | 6.81                       |      |
| 9          | Plain                 | +++             | +++       | +++                                                                                         | ++     | +      | 210  | 15   | 2    | 75,000,000 | 7.88        |                            |      |
|            | Charcoal              | +++             | +++       | +++                                                                                         | ++     | +      | ~250 | 17   | 1    | 85,000,000 | 7.93        |                            |      |
| Run 4      | 10                    | Plain           | +++       | +++                                                                                         | ++     | +      | 119  | 2    | 0    | 0          | 1,000,000   | 6.00                       |      |
|            |                       | Charcoal        | +++       | +++                                                                                         | ++     | +      | ~125 | 9    | 0    | 0          | 4,500,000   | 6.65                       |      |
|            | 11                    | Plain           | +++       | +++                                                                                         | ++/+++ | +/++   | ~200 | 16   | 2    | 0          | 8,000,000   | 6.90                       |      |
|            |                       | Charcoal        | +++       | +++                                                                                         | ++/+++ | +/++   | ---  | 17   | 0    | 0          | 8,500,000   | 6.93                       |      |
| 12         | Plain                 | +++             | +++       | ++                                                                                          | +      | 99     | 8    | 0    | 0    | 4,000,000  | 6.60        |                            |      |
|            | Charcoal              | +++             | +++       | ++                                                                                          | +      | 85     | 10   | 0    | 0    | 4,250,000  | 6.63        |                            |      |

+++ indicates uniform confluent growth. ++ indicates non-uniform confluent growth. + indicates individual colonies too numerous to accurately count. ~ indicates that an accurate CFU count could not be obtained due to some merged/touching colonies. --- indicates not determined.

Table S13

**Table S14. C3HeB/FeJ lung CFU count data used to calculate CFU/lung of mice that died after Week -3 but before Day 0 and of the untreated negative control mice.** Lung homogenates and cognate 10-fold dilutions (0.5 mL volume) were cultured on selective 7H11 agar. 7H11 agar powder was manufactured by BD (pretreatment samples) or Remel Microbiology Products (untreated control samples). The lower limit of detection was 5.70 log<sub>10</sub> CFU/lung.

| Pretreatment or untreated control | C3HeB/FeJ mouse | Assigned group*       | Death date (days post-infection) | CFU counts for the following 10-fold dilutions: (shaded cell used to calculate CFU/lung) |      |    |   | CFU/lung      | Log <sub>10</sub> CFU/lung |
|-----------------------------------|-----------------|-----------------------|----------------------------------|------------------------------------------------------------------------------------------|------|----|---|---------------|----------------------------|
|                                   |                 |                       |                                  | 5                                                                                        | 6    | 7  | 8 |               |                            |
| Pretreatment deaths               | 1               | Pre-assignment        | 29                               | Lungs not recovered                                                                      |      |    |   | ---           | ---                        |
|                                   | 2               | Pre-assignment        | 30                               | Lungs not recovered                                                                      |      |    |   | ---           | ---                        |
|                                   | 3               | Pre-assignment        | 38                               | +                                                                                        | ~250 | 23 | 3 | 1,150,000,000 | 9.06                       |
|                                   | 4               | Untreated (Run 4)     | 38                               | +                                                                                        | ~300 | 38 | 1 | 1,900,000,000 | 9.28                       |
|                                   | 5               | Pre-assignment        | 42                               | +                                                                                        | ~300 | 26 | 4 | 1,300,000,000 | 9.11                       |
|                                   | 6               | Pre-assignment        | 42                               | +                                                                                        | ~150 | 20 | 4 | 1,000,000,000 | 9.00                       |
|                                   | 7               | Pre-assignment        | 42                               | +                                                                                        | ~500 | 78 | 7 | 3,900,000,000 | 9.59                       |
|                                   | 8               | Pre-assignment        | 42                               | +                                                                                        | ~300 | 31 | 3 | 1,550,000,000 | 9.19                       |
|                                   | 9               | Pre-assignment        | 42                               | +                                                                                        | ~150 | 11 | 2 | 550,000,000   | 8.74                       |
|                                   | 10              | Pre-assignment        | 42                               | +                                                                                        | ~200 | 24 | 2 | 1,200,000,000 | 9.08                       |
|                                   | 11              | Pre-assignment        | 42                               | +                                                                                        | ~400 | 60 | 7 | 3,000,000,000 | 9.48                       |
|                                   | 12              | Pre-assignment        | 42                               | +                                                                                        | ~200 | 19 | 0 | 950,000,000   | 8.98                       |
|                                   | 13              | Pre-assignment        | 43                               | +                                                                                        | ~250 | 33 | 2 | 1,650,000,000 | 9.22                       |
|                                   | 14              | Pre-assignment        | 43                               | +                                                                                        | ~200 | 30 | 2 | 1,500,000,000 | 9.18                       |
|                                   | 15              | Pre-assignment        | 43                               | +                                                                                        | ~250 | 27 | 2 | 1,350,000,000 | 9.13                       |
|                                   | 16              | Untreated (Run 3)     | 44                               | +                                                                                        | ~150 | 21 | 2 | 1,050,000,000 | 9.02                       |
|                                   | 17              | Pre-assignment        | 45                               | +                                                                                        | ~300 | 41 | 0 | 2,050,000,000 | 9.31                       |
|                                   | 18              | Pre-assignment        | 45                               | +                                                                                        | ~200 | 25 | 1 | 1,250,000,000 | 9.10                       |
|                                   | 19              | PHZEC Week 12 Relapse | 47                               | +                                                                                        | ~250 | 24 | 0 | 1,200,000,000 | 9.08                       |
|                                   | 20              | PHZEC Week 6 Relapse  | 47                               | +                                                                                        | ~200 | 14 | 2 | 700,000,000   | 8.85                       |
|                                   | 21              | PHZE Week 10 Relapse  | 47                               | +                                                                                        | ~250 | 17 | 1 | 850,000,000   | 8.93                       |
|                                   | 22              | RHZEC Week 12 Relapse | 47                               | +                                                                                        | ~300 | 50 | 5 | 2,500,000,000 | 9.40                       |
| Untreated negative controls**     | 1               | Run 3                 | 96                               | +/++                                                                                     | 108  | 20 | 0 | 1,000,000,000 | 9.00                       |
|                                   | 2               | Run 2                 | 110                              | +                                                                                        | ~120 | 15 | 0 | 750,000,000   | 8.88                       |
|                                   | 3               | Run 4                 | 121                              | +                                                                                        | ~200 | 28 | 0 | 1,400,000,000 | 9.15                       |
|                                   | 4               | Run 1                 | 134                              | +                                                                                        | ~150 | 15 | 3 | 750,000,000   | 8.88                       |
|                                   | 5               | Run 2                 | 134                              | +                                                                                        | ~150 | 18 | 1 | 900,000,000   | 8.95                       |
|                                   | 6               | Run 3                 | 134                              | +                                                                                        | ~150 | 16 | 1 | 800,000,000   | 8.90                       |
|                                   | 7               | Run 1                 | 141                              | +                                                                                        | 62   | 8  | 0 | 310,000,000   | 8.49                       |
|                                   | 8               | Run 2                 | 169                              | +/++                                                                                     | ~300 | 39 | 4 | 1,950,000,000 | 9.29                       |
|                                   | 9               | Run 4                 | 172                              | ~500                                                                                     | 68   | 6  | 0 | 340,000,000   | 8.53                       |
|                                   | 10              | Run 1                 | 183                              | ~80                                                                                      | 11   | 1  | 0 | 55,000,000    | 7.74                       |

++ indicates non-uniform confluent growth. + indicates individual colonies too numerous to accurately count. ~ indicates that an accurate CFU count could not be obtained due to some merged/touching colonies. --- indicates not determined. \*After infection, mice from each aerosol infection run were kept separately to determine lung CFU counts at Week -6, Week -3, Day 0; and to keep for virulence/mortality controls. All other mice were randomized and were assigned to treatment regimen groups 2 days before starting treatment. "Pre-assignment" indicates that mice died/were euthanized prior to treatment group assignment. For the 4 mice that died after assignment, the regimens and time points of their assignment are given. \*\*One mouse each from aerosol infection run 3 and run 4 died/was euthanized before Day 0 and are included as pretreatment deaths in this table.

**Table S15. C3HeB/FeJ lung CFU count data used to calculate CFU/lung after 4 weeks of treatment.** Lung homogenates and cognate 10-fold dilutions (0.5 mL volume) were cultured on selective 7H11 agar ("plain" agar) and selective 7H11 agar supplemented with 0.4% activated charcoal. All 7H11 agar powder was manufactured by Remel Microbiology Products. The lower limit of detection was 0.78 log<sub>10</sub> CFU/lung per agar type.

| Regimen | C3HeB/FeJ mouse (body mass) | Agar type | CFU counts for the following 10-fold dilutions (shaded cell used to calculate CFU/lung): |      |       |      |     | CFU/lung  | Log <sub>10</sub> CFU/lung |
|---------|-----------------------------|-----------|------------------------------------------------------------------------------------------|------|-------|------|-----|-----------|----------------------------|
|         |                             |           | 0                                                                                        | 1    | 2     | 3    | 4   |           |                            |
| RHZE    | 1<br>(25.6 g)               | Plain     | Sample lost (homogenizer broke)                                                          |      |       |      |     | ---       | ---                        |
|         |                             | Charcoal  | Sample lost (homogenizer broke)                                                          |      |       |      |     | ---       | ---                        |
|         | 2<br>(29.7 g)               | Plain     | 140                                                                                      | 46   | 1     | 1    | 0   | 2,300     | 3.36                       |
|         |                             | Charcoal  | +                                                                                        | 65   | 9     | 0    | 0   | 3,250     | 3.51                       |
|         | 3<br>(26.3 g)               | Plain     | +                                                                                        | 98   | 6     | 1    | 0   | 4,900     | 3.69                       |
|         |                             | Charcoal  | +                                                                                        | 124  | 14    | 0    | 0   | 7,000     | 3.85                       |
|         | 4<br>(29.8 g)               | Plain     | +                                                                                        | ~150 | 21    | 3    | 0   | 10,500    | 4.02                       |
|         |                             | Charcoal  | +                                                                                        | ~150 | 29    | 5    | 0   | 14,500    | 4.16                       |
|         | 5<br>(32.5 g)               | Plain     | +                                                                                        | 102  | 5     | 0    | 0   | 2,500     | 3.40                       |
|         |                             | Charcoal  | +                                                                                        | 79   | 9     | 0    | 0   | 3,950     | 3.60                       |
| RHZEC   | 1<br>(26.2 g)               | Plain     | 0                                                                                        | 0    | 0     | 0    | 0   | 0         | 0                          |
|         |                             | Charcoal  | 12                                                                                       | 1    | 1     | 0    | 0   | 60        | 1.79                       |
|         | 2<br>(22.1 g)               | Plain     | 3                                                                                        | 0    | 0     | 0    | 0   | 15        | 1.20                       |
|         |                             | Charcoal  | 10                                                                                       | 0    | 0     | 1    | 0   | 50        | 1.71                       |
|         | 3<br>(27.9 g)               | Plain     | 79                                                                                       | 29   | 3     | 0    | 0   | 1,450     | 3.16                       |
|         |                             | Charcoal  | +                                                                                        | 28   | 4     | 1    | 0   | 1,400     | 3.15                       |
|         | 4<br>(26.5 g)               | Plain     | ++                                                                                       | ++   | +     | ~155 | 12  | 600,000   | 5.78                       |
|         |                             | Charcoal  | +++                                                                                      | +++  | +     | ~121 | 15  | 750,000   | 5.88                       |
|         | 5<br>(29.0 g)               | Plain     | 3                                                                                        | 0    | 0     | 0    | 0   | 15        | 1.20                       |
|         |                             | Charcoal  | 13                                                                                       | 0    | 0     | 0    | 0   | 65        | 1.82                       |
| PHZE    | 1<br>(25.8 g)               | Plain     | 0                                                                                        | 1    | 0     | 0    | 0   | 50        | 1.71                       |
|         |                             | Charcoal  | 36                                                                                       | 6    | 2     | 0    | 0   | 180       | 2.26                       |
|         | 2<br>(25.6 g)               | Plain     | 0                                                                                        | 0    | 0     | 0    | 0   | 0         | 0                          |
|         |                             | Charcoal  | 8                                                                                        | 3    | 1     | 0    | 0   | 40        | 1.61                       |
|         | 3<br>(33.0 g)               | Plain     | 55                                                                                       | 41   | 7     | 0    | 0   | 2,050     | 3.31                       |
|         |                             | Charcoal  | +                                                                                        | 53   | 10    | 0    | 0   | 2,650     | 3.42                       |
|         | 4<br>(30.2 g)               | Plain     | ~400                                                                                     | ~300 | 73    | 8    | 0   | 36,500    | 4.56                       |
|         |                             | Charcoal  | +/>++                                                                                    | +    | 55    | 7    | 2   | 27,500    | 4.44                       |
|         | 5<br>(21.4 g)               | Plain     | +++                                                                                      | ++   | +/>++ | +    | 114 | 5,700,000 | 6.76                       |
|         |                             | Charcoal  | +++                                                                                      | ++   | +/>++ | +    | 75  | 3,750,000 | 6.57                       |
| PHZEC   | 1<br>(23.8 g)               | Plain     | 0                                                                                        | 1    | 0     | 0    | 0   | 50        | 1.71                       |
|         |                             | Charcoal  | 11                                                                                       | 5    | 0     | 0    | 0   | 55        | 1.75                       |
|         | 2<br>(25.4 g)               | Plain     | 7                                                                                        | 4    | 2     | 0    | 0   | 200       | 2.30                       |
|         |                             | Charcoal  | 133                                                                                      | 17   | 1     | 0    | 0   | 850       | 2.93                       |
|         | 3<br>(22.6 g)               | Plain     | 2                                                                                        | 12   | 4     | 1    | 0   | 600       | 2.78                       |
|         |                             | Charcoal  | +                                                                                        | 83   | 6     | 1    | 0   | 4,150     | 3.62                       |
|         | 4<br>(26.8 g)               | Plain     | 0                                                                                        | 0    | 0     | 0    | 0   | 0         | 0                          |
|         |                             | Charcoal  | 12                                                                                       | 2    | 0     | 0    | 0   | 60        | 1.79                       |
|         | 5<br>(28.1 g)               | Plain     | 0                                                                                        | 1    | 0     | 0    | 0   | 50        | 1.71                       |
|         |                             | Charcoal  | 9                                                                                        | 1    | 1     | 0    | 0   | 45        | 1.66                       |

+++ indicates uniform confluent growth. ++ indicates non-uniform confluent growth. + indicates individual colonies too numerous to accurately count. ~ indicates that an accurate CFU count could not be obtained due to some merged/touching colonies. --- indicates not determined.

Table S15

**Table S16. C3HeB/FeJ lung CFU count data used to calculate CFU/lung after 6 weeks of treatment.** Lung homogenates and cognate 10-fold dilutions (0.5 mL volume) were cultured on selective 7H11 agar ("plain" agar) and selective 7H11 agar supplemented with 0.4% activated charcoal. All 7H11 agar powder was manufactured by Remel Microbiology Products. The lower limit of detection was 0.78 log<sub>10</sub> CFU/lung per agar type.

| Regimen | C3HeB/FeJ mouse (body mass) | Agar type | CFU counts for the following 10-fold dilutions (shaded cell used to calculate CFU/lung): |      |     |     | CFU/lung | Log <sub>10</sub> CFU/lung |
|---------|-----------------------------|-----------|------------------------------------------------------------------------------------------|------|-----|-----|----------|----------------------------|
|         |                             |           | 0                                                                                        | 1    | 2   | 3   |          |                            |
| RHZE    | 1<br>(24.01 g)              | Plain     | ++/+++                                                                                   | ++   | +   | 121 | 605,000  | 5.78                       |
|         |                             | Charcoal  | ++/+++                                                                                   | ++   | +   | 129 | 645,000  | 5.81                       |
|         | 2<br>(37.65 g)              | Plain     | ~200                                                                                     | 57   | 6   | 1   | 2,850    | 3.45                       |
|         |                             | Charcoal  | +                                                                                        | 69   | 5   | 1   | 3,450    | 3.54                       |
|         | 3<br>(33.10 g)              | Plain     | +                                                                                        | ~200 | 24  | 6   | 12,000   | 4.08                       |
|         |                             | Charcoal  | + / ++                                                                                   | ~300 | 28  | 5   | 14,000   | 4.15                       |
|         | 4<br>(29.61 g)              | Plain     | 13                                                                                       | 10   | 1   | 0   | 500      | 2.70                       |
|         |                             | Charcoal  | 100                                                                                      | 7    | 3   | 0   | 350      | 2.55                       |
|         | 5<br>(28.51 g)              | Plain     | + / ++                                                                                   | +    | 112 | 10  | 50,000   | 4.70                       |
|         |                             | Charcoal  | ++                                                                                       | +    | 112 | 10  | 50,000   | 4.70                       |
| RHZEC   | 1<br>(26.95 g)              | Plain     | 0                                                                                        | 0    | 0   | 0   | 0        | 0                          |
|         |                             | Charcoal  | 0                                                                                        | 1    | 0   | 0   | 50       | 1.71                       |
|         | 2<br>(30.17 g)              | Plain     | 85                                                                                       | 14   | 0   | 0   | 700      | 2.85                       |
|         |                             | Charcoal  | ~200                                                                                     | 28   | 3   | 0   | 1,400    | 3.15                       |
|         | 3<br>(32.26 g)              | Plain     | 71                                                                                       | 15   | 1   | 0   | 750      | 2.88                       |
|         |                             | Charcoal  | ~300                                                                                     | 25   | 3   | 0   | 1,250    | 3.10                       |
|         | 4<br>(31.18 g)              | Plain     | 0                                                                                        | 0    | 0   | 0   | 0        | 0                          |
|         |                             | Charcoal  | 0                                                                                        | 1    | 0   | 0   | 50       | 1.71                       |
|         | 5<br>(28.37 g)              | Plain     | 3                                                                                        | 1    | 0   | 0   | 50       | 1.71                       |
|         |                             | Charcoal  | 10                                                                                       | 1    | 0   | 0   | 50       | 1.71                       |
| PHZE    | 1<br>(27.43 g)              | Plain     | 0                                                                                        | 0    | 0   | 0   | 0        | 0                          |
|         |                             | Charcoal  | 2                                                                                        | 0    | 0   | 0   | 10       | 1.04                       |
|         | 2<br>(36.11 g)              | Plain     | 0                                                                                        | 0    | 0   | 0   | 0        | 0                          |
|         |                             | Charcoal  | 0                                                                                        | 1    | 0   | 0   | 50       | 1.71                       |
|         | 3<br>(31.23 g)              | Plain     | 0                                                                                        | 0    | 0   | 0   | 0        | 0                          |
|         |                             | Charcoal  | 8                                                                                        | 1    | 1   | 0   | 40       | 1.61                       |
|         | 4<br>(28.64 g)              | Plain     | 0                                                                                        | 0    | 0   | 0   | 0        | 0                          |
|         |                             | Charcoal  | 0                                                                                        | 0    | 0   | 0   | 0        | 0                          |
|         | 5<br>(26.83 g)              | Plain     | 0                                                                                        | 0    | 0   | 0   | 0        | 0                          |
|         |                             | Charcoal  | 18                                                                                       | 1    | 0   | 0   | 90       | 1.96                       |
| PHZEC   | 1<br>(33.18 g)              | Plain     | 0                                                                                        | 0    | 0   | 0   | 0        | 0                          |
|         |                             | Charcoal  | 0                                                                                        | 0    | 0   | 0   | 0        | 0                          |
|         | 2<br>(29.29 g)              | Plain     | 0                                                                                        | 0    | 0   | 0   | 0        | 0                          |
|         |                             | Charcoal  | 2                                                                                        | 0    | 0   | 0   | 10       | 1.04                       |
|         | 3<br>(27.64 g)              | Plain     | 0                                                                                        | 0    | 0   | 0   | 0        | 0                          |
|         |                             | Charcoal  | 2                                                                                        | 0    | 0   | 0   | 10       | 1.04                       |
|         | 4<br>(27.84 g)              | Plain     | 0                                                                                        | 0    | 0   | 0   | 0        | 0                          |
|         |                             | Charcoal  | 4                                                                                        | 0    | 0   | 0   | 20       | 1.32                       |
|         | 5<br>(33.54 g)              | Plain     | 0                                                                                        | 0    | 0   | 0   | 0        | 0                          |
|         |                             | Charcoal  | 1                                                                                        | 0    | 0   | 0   | 5        | 0.78                       |

+++ indicates uniform confluent growth. ++ indicates non-uniform confluent growth. + indicates individual colonies too numerous to accurately count. ~ indicates that an accurate CFU count could not be obtained due to some merged/touching colonies.

Table S16

**Table S17. C3HeB/FeJ lung CFU count data used to calculate CFU/lung after 8 weeks of treatment.** Undiluted lung homogenates were cultured on selective 7H11 agar supplemented with 0.4% activated charcoal (five agar plates per sample, 0.5 mL homogenate per plate). All 7H11 agar powder was manufactured by Remel Microbiology Products. The lower limit of detection was 0.30 log<sub>10</sub> CFU/lung per sample.

| Regimen | C3HeB/FeJ mouse | Body mass (g) | Agar type | CFU counts from undiluted lung homogenate (total on five plates used to calculate CFU/lung): |         |         |         |         | CFU/lung | Log <sub>10</sub> CFU/lung |
|---------|-----------------|---------------|-----------|----------------------------------------------------------------------------------------------|---------|---------|---------|---------|----------|----------------------------|
|         |                 |               |           | Plate 1                                                                                      | Plate 2 | Plate 3 | Plate 4 | Plate 5 |          |                            |
| RHZE    | 1               | 29.7          | Charcoal  | 1                                                                                            | 3       | 0       | 3       | 5       | 12       | 1.11                       |
|         | 2               | 34.3          | Charcoal  | 6                                                                                            | 4       | 3       | 7       | 4       | 24       | 1.40                       |
|         | 3               | 26.2          | Charcoal  | 1                                                                                            | 3       | 2       | 2       | 0       | 8        | 0.95                       |
|         | 4               | 35.1          | Charcoal  | 8                                                                                            | 6       | 7       | 6       | 10      | 37       | 1.58                       |
|         | 5               | 34.5          | Charcoal  | 325                                                                                          | 325     | 325     | 325     | 325     | 1,625    | 3.21                       |
| RHZEC   | 1               | 33.4          | Charcoal  | 0                                                                                            | 0       | 0       | 0       | 0       | 0        | 0                          |
|         | 2               | 30.9          | Charcoal  | 1                                                                                            | 0       | 0       | 0       | 0       | 1        | 0.30                       |
|         | 3               | 29.9          | Charcoal  | 0                                                                                            | 1       | 0       | 0       | 0       | 1        | 0.30                       |
|         | 4               | 27.2          | Charcoal  | 0                                                                                            | 0       | 0       | 0       | 1       | 1        | 0.30                       |
|         | 5               | 32.1          | Charcoal  | 0                                                                                            | 0       | 0       | 1       | 0       | 1        | 0.30                       |
| PHZE    | 1               | 31.3          | Charcoal  | 0                                                                                            | 0       | 1       | 0       | 0       | 1        | 0.30                       |
|         | 2               | 28.6          | Charcoal  | 0                                                                                            | 0       | 0       | 0       | 0       | 0        | 0                          |
|         | 3               | 38.5          | Charcoal  | 46                                                                                           | 43      | 42      | 32      | 4       | 167      | 2.23                       |
|         | 4               | 28.0          | Charcoal  | 0                                                                                            | 0       | 1       | 0       | 0       | 1        | 0.30                       |
|         | 5               | 32.7          | Charcoal  | 0                                                                                            | 0       | 0       | 0       | 0       | 0        | 0                          |
| PHZEC   | 1               | 25.8          | Charcoal  | 0                                                                                            | 0       | 0       | 0       | 0       | 0        | 0                          |
|         | 2               | 37.1          | Charcoal  | 0                                                                                            | 0       | 0       | 0       | 0       | 0        | 0                          |
|         | 3               | 27.7          | Charcoal  | 0                                                                                            | 0       | 0       | 0       | 0       | 0        | 0                          |
|         | 4               | 33.1          | Charcoal  | 0                                                                                            | 0       | 0       | 0       | 0       | 0        | 0                          |
|         | 5               | 28.8          | Charcoal  | 0                                                                                            | 0       | 0       | 0       | 0       | 0        | 0                          |

Table S17

**Table S18. C3HeB/FeJ lung CFU count data used to calculate CFU/lung after 10 weeks of treatment.** Undiluted lung homogenates were cultured on selective 7H11 agar supplemented with 0.4% activated charcoal (five agar plates per sample, 0.5 mL homogenate per plate). All 7H11 agar powder was manufactured by Remel Microbiology Products. The lower limit of detection was 0.30 log<sub>10</sub> CFU/lung per sample.

| Regimen | C3HeB/FeJ mouse | Body mass (g) | Agar type | CFU counts from undiluted lung homogenate (total on five plates used to calculate CFU/lung): |         |         |         |         | CFU/lung | Log <sub>10</sub> CFU/lung |
|---------|-----------------|---------------|-----------|----------------------------------------------------------------------------------------------|---------|---------|---------|---------|----------|----------------------------|
|         |                 |               |           | Plate 1                                                                                      | Plate 2 | Plate 3 | Plate 4 | Plate 5 |          |                            |
| RHZE    | 1               | 34.8          | Charcoal  | 2                                                                                            | 0       | 2       | 2       | 4       | 10       | 1.04                       |
|         | 2               | 33.5          | Charcoal  | 3                                                                                            | 1       | 4       | 1       | 0       | 9        | 1.00                       |
|         | 3               | 31.7          | Charcoal  | 18                                                                                           | 7       | 11      | 12      | 9       | 57       | 1.76                       |
|         | 4               | 34.8          | Charcoal  | 0                                                                                            | 1       | 1       | 1       | 1       | 4        | 0.70                       |
|         | 5               | 36.7          | Charcoal  | 2                                                                                            | 0       | 0       | 0       | 0       | 2        | 0.48                       |
| RHZEC   | 1               | 39.7          | Charcoal  | 1                                                                                            | 1       | 0       | 0       | 0       | 2        | 0.48                       |
|         | 2               | 28.9          | Charcoal  | 26                                                                                           | 22      | 32      | 20      | 4       | 104      | 2.02                       |
|         | 3               | 28.4          | Charcoal  | 0                                                                                            | 0       | 0       | 0       | 0       | 0        | 0                          |
|         | 4               | 31.7          | Charcoal  | 43                                                                                           | 34      | 29      | 32      | 7       | 145      | 2.16                       |
|         | 5               | 31.6          | Charcoal  | 0                                                                                            | 0       | 0       | 0       | 0       | 0        | 0                          |
| PHZE    | 1               | 36.2          | Charcoal  | 0                                                                                            | 0       | 0       | 0       | 0       | 0        | 0                          |
|         | 2               | 24.7          | Charcoal  | 0                                                                                            | 0       | 0       | 0       | 0       | 0        | 0                          |
|         | 3               | 31.1          | Charcoal  | 0                                                                                            | 0       | 0       | 0       | 0       | 0        | 0                          |
|         | 4               | 34.4          | Charcoal  | 0                                                                                            | 0       | 0       | 0       | 0       | 0        | 0                          |
|         | 5               | 35.5          | Charcoal  | 0                                                                                            | 0       | 0       | 0       | 0       | 0        | 0                          |
| PHZEC   | 1               | 38.8          | Charcoal  | 0                                                                                            | 0       | 0       | 0       | 0       | 0        | 0                          |
|         | 2               | 30.9          | Charcoal  | 0                                                                                            | 0       | 0       | 0       | 0       | 0        | 0                          |
|         | 3               | 37.8          | Charcoal  | 0                                                                                            | 0       | 0       | 0       | 0       | 0        | 0                          |
|         | 4               | 35.6          | Charcoal  | 0                                                                                            | 0       | 0       | 0       | 0       | 0        | 0                          |
|         | 5               | 34.0          | Charcoal  | 0                                                                                            | 0       | 0       | 0       | 0       | 0        | 0                          |

Table S18

**Table S19. C3HeB/FeJ lung CFU count data used to calculate CFU/lung after 12 weeks of treatment.** Undiluted lung homogenates were cultured on selective 7H11 agar supplemented with 0.4% activated charcoal (five agar plates per sample, 0.5 mL homogenate per plate). All 7H11 agar powder was manufactured by Remel Microbiology Products. The lower limit of detection was 0.30 log<sub>10</sub> CFU/lung per sample.

| Regimen | C3HeB/FeJ mouse | Body mass (g) | Agar type | CFU counts from undiluted lung homogenate (total on five plates used to calculate CFU/lung): |         |         |         |         | CFU/lung | Log <sub>10</sub> CFU/lung |
|---------|-----------------|---------------|-----------|----------------------------------------------------------------------------------------------|---------|---------|---------|---------|----------|----------------------------|
|         |                 |               |           | Plate 1                                                                                      | Plate 2 | Plate 3 | Plate 4 | Plate 5 |          |                            |
| RHZE    | 1               | 34.75         | Charcoal  | 0                                                                                            | 1       | 0       | 0       | 0       | 1        | 0.30                       |
|         | 2               | 36.35         | Charcoal  | 0                                                                                            | 0       | 0       | 0       | 0       | 0        | 0                          |
|         | 3               | 38.04         | Charcoal  | 0                                                                                            | 0       | 0       | 0       | 0       | 0        | 0                          |
|         | 4               | 36.38         | Charcoal  | 13                                                                                           | 16      | 15      | 10      | 6       | 60       | 1.79                       |
|         | 5               | 35.95         | Charcoal  | 0                                                                                            | 0       | 0       | 0       | 0       | 0        | 0                          |
| RHZEC   | 1               | 34.78         | Charcoal  | 0                                                                                            | 0       | 0       | 0       | 0       | 0        | 0                          |
|         | 2               | 40.57         | Charcoal  | 0                                                                                            | 0       | 0       | 0       | 0       | 0        | 0                          |
|         | 3               | 32.26         | Charcoal  | 0                                                                                            | 0       | 0       | 0       | 0       | 0        | 0                          |
|         | 4               | 30.49         | Charcoal  | 0                                                                                            | 0       | 0       | 0       | 0       | 0        | 0                          |
|         | 5               | 36.15         | Charcoal  | 0                                                                                            | 0       | 0       | 0       | 0       | 0        | 0                          |
| PHZE    | 1               | 33.29         | Charcoal  | 0                                                                                            | 0       | 0       | 0       | 0       | 0        | 0                          |
|         | 2               | 33.71         | Charcoal  | 0                                                                                            | 0       | 0       | 0       | 0       | 0        | 0                          |
|         | 3               | 35.79         | Charcoal  | 0                                                                                            | 0       | 0       | 0       | 0       | 0        | 0                          |
|         | 4               | 27.92         | Charcoal  | 0                                                                                            | 0       | 0       | 0       | 0       | 0        | 0                          |
|         | 5               | 33.34         | Charcoal  | 0                                                                                            | 0       | 0       | 0       | 0       | 0        | 0                          |
| PHZEC   | 1               | 31.70         | Charcoal  | 0                                                                                            | 0       | 0       | 0       | 0       | 0        | 0                          |
|         | 2               | 27.94         | Charcoal  | 0                                                                                            | 0       | 0       | 0       | 0       | 0        | 0                          |
|         | 3               | 40.81         | Charcoal  | 0                                                                                            | 0       | 0       | 0       | 0       | 0        | 0                          |
|         | 4               | 27.54         | Charcoal  | 0                                                                                            | 0       | 0       | 0       | 0       | 0        | 0                          |
|         | 5               | 33.59         | Charcoal  | 0                                                                                            | 0       | 0       | 0       | 0       | 0        | 0                          |

Table S19



**Table S20. Lung CFU data from C3HeB/FeJ mice assessed for relapse after 6 weeks of treatment.** Mice were sacrificed 6 months after stopping treatment. Unless otherwise stated, undiluted lung homogenates (2.25 mL homogenate over 4 agar plates) and cognate 10<sup>-2</sup> and 10<sup>-4</sup> dilutions (1 agar plate each, 0.5 mL per plate) were cultured on selective 7H11 agar supplemented with 0.4% activated charcoal. All 7H11 agar powder was manufactured by BD. The lower limit of detection was 0.32 log<sub>10</sub> CFU/lung per sample, except for mouse 1 (see NOTE 1).

| C3HeB/FeJ mouse | Body mass (g) | CFU counts for the following dilutions:<br>(shaded cells used to approximate CFU/lung) |           |           |           |                           |                           | CFU/lung (approximate) | Log <sub>10</sub> CFU/lung (approximate) |
|-----------------|---------------|----------------------------------------------------------------------------------------|-----------|-----------|-----------|---------------------------|---------------------------|------------------------|------------------------------------------|
|                 |               | Undiluted                                                                              |           |           |           | 10 <sup>-2</sup> dilution | 10 <sup>-4</sup> dilution |                        |                                          |
|                 |               | Plate 1                                                                                | Plate 2   | Plate 3   | Plate 4   |                           |                           |                        |                                          |
| 1 (NOTE 1)      | ---           | ---                                                                                    | ---       | ---       | ---       | ---                       | ---                       | 800,000,000            | 8.90                                     |
| 2 (NOTE 2)      | ---           | +/Contam.                                                                              | +/Contam. | +/Contam. | +/Contam. | Contam.                   | Contam.                   | 6,667                  | 3.82                                     |
| 3               | 48.2          | 0                                                                                      | 0         | 0         | 0         | 0                         | 0                         | 0                      | 0                                        |
| 4               | 49.1          | 0                                                                                      | 0         | 0         | 0         | 0                         | 0                         | 0                      | 0                                        |
| 5               | 43.8          | 0                                                                                      | 0         | 0         | 0         | 0                         | 0                         | 0                      | 0                                        |
| 6               | 41.7          | 0                                                                                      | 0         | 0         | 0         | 0                         | 0                         | 0                      | 0                                        |
| 7               | 45.1          | 0                                                                                      | 0         | 0         | 0         | 0                         | 0                         | 0                      | 0                                        |
| 8               | 48.3          | +                                                                                      | +         | +         | +         | 32                        | 0                         | 16,000                 | 4.20                                     |
| 9               | 37.7          | 0                                                                                      | 0         | 0         | 0         | 0                         | 0                         | 0                      | 0                                        |
| 10              | 50.5          | 0                                                                                      | 0         | 0         | 0         | 0                         | 0                         | 0                      | 0                                        |
| 11              | 50.4          | 0                                                                                      | 0         | 0         | 0         | 0                         | 0                         | 0                      | 0                                        |
| 12              | 25.5          | +++                                                                                    | +++       | +++       | +++       | + / ++                    | +                         | 75,000,000             | 7.88                                     |
| 13              | 35.3          | 1                                                                                      | 0         | 0         | 0         | 0                         | 0                         | 1                      | 0.32                                     |
| 14              | 46.7          | 0                                                                                      | 0         | 0         | 0         | 0                         | 0                         | 0                      | 0                                        |
| 15              | 46.8          | 0                                                                                      | 0         | 0         | 0         | 0                         | 0                         | 0                      | 0                                        |
| 16              | 42.5          | 0                                                                                      | 0         | 0         | 0         | 0                         | 0                         | 0                      | 0                                        |
| 17              | 38.1          | 0                                                                                      | 0         | 0         | 0         | 0                         | 0                         | 0                      | 0                                        |
| 18              | ---           | Mouse died on Day 0, before treatment was administered (NOTE 3)                        |           |           |           |                           |                           | ---                    | ---                                      |

+++ indicates uniform confluent growth. ++ indicates non-uniform confluent growth. + indicates individual colonies too numerous to accurately count, approximated at 1,500 CFU. --- indicates not determined. Contam. indicates fungal or bacterial contamination was observed on the agar. For the undiluted homogenate samples, the contamination did not preclude reading the sample. **NOTE 1:** Mouse 1 died 32 days prior to the relapse time point. Because a high bacterial burden was expected, the 10<sup>-5</sup> to 10<sup>-8</sup> dilutions of lung homogenate were plated, with the following CFU counts: 10<sup>-5</sup> dilution, "+" CFU; 10<sup>-6</sup> dilution, ~150 CFU; 10<sup>-7</sup> dilution, 16 CFU (used to calculate CFU/lung); 10<sup>-8</sup> dilution, 1 CFU (lower limit of detection was 5.70 log<sub>10</sub> CFU/lung). **NOTE 2:** Mouse 2 died 3 days prior to the relapse time point. **NOTE 3:** This mouse is included in the "Pretreatment deaths" CFU table (Table S14) as C3HeB/FeJ mouse 20.

**Table S21. Lung CFU data from C3HeB/FeJ mice assessed for relapse after 8 weeks of treatment.** Mice were sacrificed 6 months after stopping treatment. Unless otherwise stated, undiluted lung homogenates (2.25 mL homogenate over 4 agar plates) and cognate 10<sup>-2</sup> and 10<sup>-4</sup> dilutions (1 agar plate each, 0.5 mL per plate) were cultured on selective 7H11 agar supplemented with 0.4% activated charcoal. All 7H11 agar powder was manufactured by BD. The lower limit of detection was 0.32 log<sub>10</sub> CFU/lung per sample, except for PHZE mouse 1 (see NOTE).

| Regimen | C3HeB/FeJ mouse | Body mass (g) | CFU counts for the following dilutions:<br>(shaded cells used to approximate CFU/lung) |           |           |           |                           |                           | CFU/lung (approximate) | Log <sub>10</sub> CFU/lung (approximate) |
|---------|-----------------|---------------|----------------------------------------------------------------------------------------|-----------|-----------|-----------|---------------------------|---------------------------|------------------------|------------------------------------------|
|         |                 |               | Undiluted                                                                              |           |           |           | 10 <sup>-2</sup> dilution | 10 <sup>-4</sup> dilution |                        |                                          |
|         |                 |               | Plate 1                                                                                | Plate 2   | Plate 3   | Plate 4   |                           |                           |                        |                                          |
| PHZE    | 1 (NOTE)        | ---           | ---                                                                                    | ---       | ---       | ---       | ---                       | ---                       | 1,650,000,000          | 9.22                                     |
|         | 2               | ---           | 0/Contam.                                                                              | 0/Contam. | 0/Contam. | 0/Contam. | 0/Contam.                 | 0/Contam.                 | 0                      | 0                                        |
|         | 3               | ---           | Contam.                                                                                | Contam.   | Contam.   | Contam.   | +                         | 0                         | 7,500,000              | 6.88                                     |
|         | 4               | 32.38         | +++                                                                                    | +++       | +++       | +++       | ++/+++                    | +                         | 75,000,000             | 7.88                                     |
|         | 5               | 51.50         | +                                                                                      | +         | +         | +         | 28                        | 0                         | 14,000                 | 4.15                                     |
|         | 6               | 48.33         | +                                                                                      | +         | +         | +         | 1                         | 0                         | 500                    | 2.70                                     |
|         | 7               | 43.42         | 2                                                                                      | 0         | 1         | 3         | 0                         | 0                         | 7                      | 0.88                                     |
|         | 8               | 53.64         | +/Contam.                                                                              | +/Contam. | +/Contam. | +/Contam. | 6                         | 0                         | 3,000                  | 3.48                                     |
|         | 9               | 45.70         | 1                                                                                      | 0         | 0         | 0         | 0                         | 0                         | 1                      | 0.32                                     |
|         | 10              | 46.02         | 0                                                                                      | 0         | 0         | 0         | 0                         | 0                         | 0                      | 0                                        |
|         | 11              | 51.64         | +                                                                                      | +         | +         | +         | 32                        | 0                         | 16,000                 | 4.20                                     |
|         | 12-16           | 45.69-53.34   | 0                                                                                      | 0         | 0         | 0         | 0                         | 0                         | 0                      | 0                                        |
|         | 17              | 43.86         | +/++                                                                                   | +/++      | +/++      | +/++      | 78                        | 0                         | 39,000                 | 4.59                                     |
| 18      | 41.95           | 0             | 0                                                                                      | 0         | 0         | 0         | 0                         | 0                         | 0                      |                                          |
| PHZEC   | 1               | 50.69         | 9                                                                                      | 8         | 9         | 4         | 0                         | 0                         | 33                     | 1.54                                     |
|         | 2-18            | 36.25-50.46   | 0                                                                                      | 0         | 0         | 0         | 0                         | 0                         | 0                      | 0                                        |

+++ indicates uniform confluent growth. ++ indicates non-uniform confluent growth. + indicates individual colonies too numerous to accurately count, approximated at 1,500 CFU. --- indicates not determined. Contam. indicates fungal or bacterial contamination was observed on the agar. Except for the PHZE Mouse 3 undiluted lung homogenate samples, the contamination did not preclude reading the samples. **NOTE:** PHZE mouse 1 died 32 days prior to the relapse time point. Because a high bacterial burden was expected, the 10<sup>-5</sup> to 10<sup>-8</sup> dilutions of lung homogenate were plated, with the following CFU counts: 10<sup>-5</sup> dilution, "+++" CFU; 10<sup>-6</sup> dilution, "+" CFU; 10<sup>-7</sup> dilution, 33 CFU (used to calculate CFU/lung); 10<sup>-8</sup> dilution, 2 CFU (lower limit of detection was 5.70 log<sub>10</sub> CFU/lung).

Table S21

**Table S22. Lung CFU data from C3HeB/FeJ mice assessed for relapse after 10 weeks of treatment.** Mice were sacrificed 6 months after stopping treatment. Unless otherwise indicated, undiluted lung homogenates (2.25 mL homogenate over 4 agar plates) and cognate 10<sup>-2</sup> and 10<sup>-4</sup> dilutions (1 agar plate each, 0.5 mL per plate) were cultured on selective 7H11 agar supplemented with 0.4% activated charcoal. All 7H11 agar powder was manufactured by BD. The lower limit of detection was 0.32 log<sub>10</sub> CFU/lung per sample, except for RHZEC mouse 2 (see NOTE 2).

| Regimen | C3HeB/FeJ mouse | Body mass (g) | CFU counts for the following dilutions:<br>(shaded cells used to approximate CFU/lung) |         |         |         |                           |                           | CFU/lung (approximate) | Log <sub>10</sub> CFU/lung (approximate) |
|---------|-----------------|---------------|----------------------------------------------------------------------------------------|---------|---------|---------|---------------------------|---------------------------|------------------------|------------------------------------------|
|         |                 |               | Undiluted                                                                              |         |         |         | 10 <sup>-2</sup> dilution | 10 <sup>-4</sup> dilution |                        |                                          |
|         |                 |               | Plate 1                                                                                | Plate 2 | Plate 3 | Plate 4 |                           |                           |                        |                                          |
| RHZEC   | 1 (NOTE 1)      | 16.8          | .+++                                                                                   | +++     | +++     | +++     | ---                       | ---                       | 665,000                | 5.82                                     |
|         | 2 (NOTE 2)      | 33.40         | +++                                                                                    | Contam. | Contam. | Contam. | +++                       | ++/+++                    | 4,125,000,000          | 9.62                                     |
|         | 3               | 43.95         | +/+                                                                                    | +/+     | +/+     | +/+     | 0                         | 0                         | 36,667                 | 4.56                                     |
|         | 4               | 47.05         | +/+                                                                                    | +/+     | +/+     | +/+     | 0                         | 0                         | 36,667                 | 4.56                                     |
|         | 5               | 48.85         | 1                                                                                      | 1       | 1       | 1       | 0                         | 0                         | 4                      | 0.74                                     |
|         | 6               | 43.95         | +++                                                                                    | +++     | +++     | +++     | ++/+++                    | 133                       | 665,000                | 5.82                                     |
|         | 7               | 49.26         | 0                                                                                      | 1       | 0       | 0       | 0                         | 0                         | 1                      | 0.32                                     |
|         | 8-17            | 36.77-50.54   | 0                                                                                      | 0       | 0       | 0       | 0                         | 0                         | 0                      | 0                                        |
|         | 18              | 48.03         | 0                                                                                      | 0       | 0       | 1       | 0                         | 0                         | 1                      | 0.32                                     |
| PHZE    | 1               | ---           | Mouse died on Day 0, before treatment was administered (NOTE 3)                        |         |         |         |                           |                           | ---                    | ---                                      |
|         | 2-18            | 29.84-54.22   | 0                                                                                      | 0       | 0       | 0       | 0                         | 0                         | 0                      | 0                                        |
| PHZEC   | 1 (NOTE 4)      | ---           | 0                                                                                      | 0       | 0       | 0       | 0                         | 0                         | 0                      | 0                                        |
|         | 2-13            | 41.18-51.72   | 0                                                                                      | 0       | 0       | 0       | 0                         | 0                         | 0                      | 0                                        |
|         | 14              | 43.73         | +++                                                                                    | +++     | +++     | +++     | +++                       | +/+                       | 250,000,000            | 8.40                                     |
|         | 15-18           | 34.79-49.52   | 0                                                                                      | 0       | 0       | 0       | 0                         | 0                         | 0                      | 0                                        |

+++ indicates uniform confluent growth, approximated at 150,000 CFU. ++ indicates non-uniform confluent growth, approximated at 15,000 CFU. + indicates individual colonies too numerous to accurately count, approximated at 1,500 CFU. --- indicates not determined. Contam. indicates fungal or bacterial contamination was observed on the agar which precluded reading the sample. **NOTE 1:** RHZEC Mouse 1 died 31 days prior to the relapse time point. Only undiluted lung homogenate was plated. CFU/lung was approximated using data from RHZEC Mouse 6. **NOTE 2:** Due to contamination that required discarding plates before reading, the lower limit of detection of this sample was 0.78 log<sub>10</sub> CFU/mL. **NOTE 3:** This mouse is included in the "Pretreatment deaths" CFU table (Table S14) as C3HeB/FeJ mouse 21. **NOTE 4:** PHZEC mouse 1 died 2 days prior to the relapse time point.

**Table S23. Lung CFU data from C3HeB/FeJ mice assessed for relapse after 12 weeks of treatment.** Mice were sacrificed 6 months after stopping treatment. Undiluted lung homogenates (2.25 mL homogenate over 4 agar plates) and cognate 10<sup>-2</sup> and 10<sup>-4</sup> dilutions (1 agar plate each, 0.5 mL per plate) were cultured on selective 7H11 agar supplemented with 0.4% activated charcoal. All 7H11 agar powder was manufactured by BD. The lower limit of detection was 0.32 log<sub>10</sub> CFU/lung per sample.

| Regimen | C3HeB/FeJ mouse | Body mass (g)                                                           | CFU counts for the following dilutions:<br>(shaded cells used to approximate CFU/lung) |           |           |           |                           |                           | CFU/lung (approximate) | Log <sub>10</sub> CFU/lung (approximate) |
|---------|-----------------|-------------------------------------------------------------------------|----------------------------------------------------------------------------------------|-----------|-----------|-----------|---------------------------|---------------------------|------------------------|------------------------------------------|
|         |                 |                                                                         | Undiluted                                                                              |           |           |           | 10 <sup>-2</sup> dilution | 10 <sup>-4</sup> dilution |                        |                                          |
|         |                 |                                                                         | Plate 1                                                                                | Plate 2   | Plate 3   | Plate 4   |                           |                           |                        |                                          |
| RHZE    | 1-3             | 47.69-53.34                                                             | 0                                                                                      | 0         | 0         | 0         | 0                         | 0                         | 0                      | 0                                        |
|         | 4               | 53.53                                                                   | ++                                                                                     | ++        | ++        | ++        | +                         | 72                        | 3,600,000              | 6.56                                     |
|         | 5               | 41.43                                                                   | 0                                                                                      | 0         | 1         | 2         | 0                         | 0                         | 3                      | 0.64                                     |
|         | 6               | 48.39                                                                   | 0                                                                                      | 0         | 0         | 0         | 0                         | 0                         | 0                      | 0                                        |
|         | 7               | 49.68                                                                   | 0                                                                                      | 0         | 1         | 0         | 0                         | 0                         | 1                      | 0.32                                     |
|         | 8               | 44.47                                                                   | ++/+++                                                                                 | ++/+++    | ++/+++    | ++/+++    | 0                         | 0                         | 4,125,000              | 6.62                                     |
|         | 9               | 52.17                                                                   | +++                                                                                    | +++       | +++       | +++       | ++/+++                    | +                         | 75,000,000             | 7.88                                     |
|         | 10              | 54.03                                                                   | ~150                                                                                   | ~150      | ~150      | ~150      | 1                         | 0                         | 667                    | 2.82                                     |
|         | 11              | 41.62                                                                   | +                                                                                      | +         | +         | +         | 29                        | 0                         | 14,500                 | 4.16                                     |
|         | 12              | 50.42                                                                   | 0                                                                                      | 0         | 0         | 0         | 0                         | 0                         | 0                      | 0                                        |
|         | 13              | 50.04                                                                   | +++                                                                                    | +++       | +++       | +++       | ++/+++                    | ~500                      | 25,000,000             | 7.40                                     |
|         | 14              | 49.13                                                                   | ++/+++                                                                                 | ++/+++    | ++/+++    | ++/+++    | +                         | 30                        | 1,500,000              | 6.18                                     |
|         | 15              | 43.29                                                                   | + / ++                                                                                 | + / ++    | + / ++    | + / ++    | 124                       | 1                         | 62,000                 | 4.79                                     |
|         | 16              | 52.08                                                                   | + / ++                                                                                 | + / ++    | + / ++    | + / ++    | 70                        | 0                         | 35,000                 | 4.54                                     |
| 17-19   | 36-23-50.11     | 0                                                                       | 0                                                                                      | 0         | 0         | 0         | 0                         | 0                         | 0                      |                                          |
| 20      | ---             | Mouse died 29 days before relapse time point; lungs were not recovered. |                                                                                        |           |           |           |                           | ---                       | ---                    |                                          |
| RHZEC   | 1-6             | 45.77-51.88                                                             | 0                                                                                      | 0         | 0         | 0         | 0                         | 0                         | 0                      | 0                                        |
|         | 7               | 38.09                                                                   | +                                                                                      | +         | +         | +         | 17                        | 1                         | 8,500                  | 3.93                                     |
|         | 8-14            | 39.20-50.80                                                             | 0                                                                                      | 0         | 0         | 0         | 0                         | 0                         | 0                      | 0                                        |
|         | 15              | 44.18                                                                   | 0/Contam.                                                                              | 0/Contam. | 0/Contam. | 0/Contam. | 0                         | 0                         | 0                      | 0                                        |
|         | 16              | 51.02                                                                   | 1                                                                                      | 0         | 0         | 0         | 0                         | 0                         | 1                      | 0.32                                     |
|         | 17              | 45.29                                                                   | 0                                                                                      | 0         | 0         | 0         | 0                         | 0                         | 0                      | 0.00                                     |
|         | 18 (NOTE 1)     | 14.97                                                                   | ++                                                                                     | ++        | ++        | ++        | +                         | 8                         | 400,000                | 5.60                                     |
|         | 19              | ---                                                                     | Mouse died 38 days into treatment due to gavage accident.                              |           |           |           |                           |                           | ---                    | ---                                      |
| 20      | ---             | Mouse died on Day 0, before treatment was administered (NOTE 2)         |                                                                                        |           |           |           |                           | ---                       | ---                    |                                          |
| PHZE    | 1 (NOTE 3)      | ---                                                                     | 0/Contam.                                                                              | 0/Contam. | 0/Contam. | 0/Contam. | 0/Contam.                 | 0/Contam.                 | 0                      | 0                                        |
|         | 2               | ---                                                                     | 0/Contam.                                                                              | 0/Contam. | 0/Contam. | 0/Contam. | 0                         | 0                         | 0                      | 0                                        |
|         | 3               | ---                                                                     | 0/Contam.                                                                              | 0/Contam. | 0/Contam. | 0/Contam. | 0                         | 0                         | 0                      | 0                                        |
|         | 4               | ---                                                                     | 0                                                                                      | 0         | 0         | 0         | 0                         | 0                         | 0                      | 0                                        |
|         | 5               | ---                                                                     | 0/Contam.                                                                              | 0/Contam. | 0/Contam. | 0/Contam. | 0/Contam.                 | 0/Contam.                 | 0                      | 0                                        |
|         | 6-14            | 40.67-53.83                                                             | 0                                                                                      | 0         | 0         | 0         | 0                         | 0                         | 0                      | 0                                        |
|         | 15              | 43.33                                                                   | 0                                                                                      | 0         | 1         | 0         | 0                         | 0                         | 1                      | 0.32                                     |
|         | 16              | 39.12                                                                   | +++                                                                                    | +++       | +++       | +++       | + / ++                    | 60                        | 3,000,000              | 6.48                                     |
|         | 17-20           | 42.54-52.63                                                             | 0                                                                                      | 0         | 0         | 0         | 0                         | 0                         | 0                      | 0                                        |
| PHZEC   | 1-18            | 37.50-52.74                                                             | 0                                                                                      | 0         | 0         | 0         | 0                         | 0                         | 0                      | 0.00                                     |
|         | 19              | ---                                                                     | Mouse died 6 days before relapse time point (cage flood); lungs were not recovered.    |           |           |           |                           |                           | ---                    | ---                                      |
|         | 20              | ---                                                                     | Mouse died on Day 0, before treatment was administered (NOTE 4)                        |           |           |           |                           |                           | ---                    | ---                                      |

+++ indicates uniform confluent growth, approximated at 150,000 CFU. ++ indicates non-uniform confluent growth, approximated at 15,000 CFU. + indicates individual colonies too numerous to accurately count, approximated at 1,500 CFU. --- indicates not determined. Contam. indicates fungal or bacterial contamination was observed on the agar. The contamination did not preclude reading the samples. NOTE 1: RHZEC Mouse 18 died 55 days after stopping treatment. **NOTE 2:** This mouse is included in the "Pretreatment deaths" CFU table (**Table S14**) as C3HeB/FeJ mouse 22. **NOTE 3:** PHZE mice 1-5 died 45 days before the relapse time point due to a cage flood. **NOTE 4:** This mouse is included in the "Pretreatment deaths" CFU table as C3HeB/FeJ mouse 19.

Table S23

**Table S24. Trough clofazimine and rifapentine serum concentrations for individual mice after 4, 8, and 12 weeks of treatment with clofazimine- and rifapentine-containing regimens, respectively.** Serum samples were obtained at sacrifice, about 72 hours after dosing. For each time point and treatment group, the mouse number corresponds to the mouse number in the corresponding CFU count data tables.

| Mouse strain | Regimen | Mouse | Serum clofazimine (µg/mL) |        |         | Serum rifapentine (µg/mL) |        |         |
|--------------|---------|-------|---------------------------|--------|---------|---------------------------|--------|---------|
|              |         |       | Week 4                    | Week 8 | Week 12 | Week 4                    | Week 8 | Week 12 |
| BALB/c       | RHZEC   | 1     | 1.36                      | 1.11   | 1.55    | ---                       | ---    | ---     |
|              |         | 2     | 1.56                      | 1.95   | 1.92    | ---                       | ---    | ---     |
|              |         | 3     | 1.38                      | 1.39   | 1.12    | ---                       | ---    | ---     |
|              |         | 4     | 1.23                      | 1.49   | 1.37    | ---                       | ---    | ---     |
|              |         | 5     | 1.35                      | 2.17   | 2.13    | ---                       | ---    | ---     |
|              | PHZE    | 1     | ---                       | ---    | ---     | 12.42                     | 8.77   | 8.05    |
|              |         | 2     | ---                       | ---    | ---     | 8.15                      | 5.84   | 7.83    |
|              |         | 3     | ---                       | ---    | ---     | 8.90                      | 9.80   | 10.40   |
|              |         | 4     | ---                       | ---    | ---     | 6.25                      | 9.54   | 10.07   |
|              |         | 5     | ---                       | ---    | ---     | 8.77                      | 6.41   | 9.20    |
|              | PHZEC   | 1     | 1.93                      | 1.68   | 1.81    | samples lost              | 11.14  | 10.94   |
|              |         | 2     | 1.25                      | 1.34   | 2.00    |                           | 15.07  | 15.65   |
|              |         | 3     | 1.58                      | 1.44   | 1.39    |                           | 11.31  | 4.91    |
|              |         | 4     | 0.83                      | 0.89   | 1.87    |                           | 7.91   | 16.01   |
|              |         | 5     | 1.48                      | 0.90   | 1.97    |                           | 9.30   | 13.03   |
| C3HeB/FeJ    | RHZEC   | 1     | 0.98                      | 1.73   | 1.98    | ---                       | ---    | ---     |
|              |         | 2     | 1.77                      | 1.13   | 1.65    | ---                       | ---    | ---     |
|              |         | 3     | 0.83                      | 1.34   | 1.68    | ---                       | ---    | ---     |
|              |         | 4     | 1.05                      | 2.09   | 2.52    | ---                       | ---    | ---     |
|              |         | 5     | 0.98                      | 1.49   | 1.21    | ---                       | ---    | ---     |
|              | PHZE    | 1     | ---                       | ---    | ---     | 5.46                      | 6.46   | 3.02    |
|              |         | 2     | ---                       | ---    | ---     | 4.19                      | 5.83   | 6.67    |
|              |         | 3     | ---                       | ---    | ---     | 2.58                      | 3.58   | 6.15    |
|              |         | 4     | ---                       | ---    | ---     | 3.20                      | 2.38   | 4.36    |
|              |         | 5     | ---                       | ---    | ---     | 5.80                      | 5.82   | 5.22    |
|              | PHZEC   | 1     | 0.72                      | 1.78   | 1.44    | 10.29                     | 7.15   | 8.31    |
|              |         | 2     | 0.88                      | 1.06   | 2.06    | 6.19                      | 7.68   | 12.86   |
|              |         | 3     | 1.59                      | 1.30   | 1.68    | 9.50                      | 9.93   | 6.83    |
|              |         | 4     | 1.15                      | 0.97   | 2.94    | 9.78                      | 4.68   | 10.23   |
|              |         | 5     | 1.13                      | 1.62   | 1.54    | 9.00                      | 5.61   | 12.97   |

--- indicates not applicable.

**Table S25. Relapse data of mice receiving the standard first-line regimen from six previous studies evaluating clofazimine and high-dose rifapentine in BALB/c mice.** For drug regimens, the number before each regimen or regimen phase indicates the duration of administration in months, where 1 month equals 4 weeks. Drug abbreviations and doses are as follows: R, rifampin 10 mg/kg; H, isoniazid 10 mg/kg; Z, pyrazinamide 150 mg/kg; E, ethambutol 100 mg/kg.

| Reference                            | Mean (SD) log <sub>10</sub> CFU/lung on Day 0 | Regimen   | Proportion of mice with culture-positive relapse by treatment duration |                    |                   |                  |
|--------------------------------------|-----------------------------------------------|-----------|------------------------------------------------------------------------|--------------------|-------------------|------------------|
|                                      |                                               |           | 12 weeks                                                               | 16 weeks           | 20 weeks          | 24 weeks         |
| Rosenthal <i>et al.</i> 2008         | 7.21 (0.07)                                   | 2RHZ/1RH  | 15/15                                                                  | ---                | ---               | ---              |
| Rosenthal <i>et al.</i> 2012         | 7.48 (0.10)                                   | 2RHZ/1RH  | 15/15                                                                  | ---                | ---               | ---              |
| Tyagi <i>et al.</i> 2015             | 9.02 (0.37)                                   | 2RHZE/4RH | ---                                                                    | 5/15               | 3/15              | 1/10             |
| Ammerman <i>et al.</i> 2018, Study 1 | 6.67 (0.34)                                   | 2RHZE/2RH | ---                                                                    | 7/15               | ---               | ---              |
| Ammerman <i>et al.</i> 2018, Study 2 | 7.11 (0.10)                                   | 2RHZE/4RH | ---                                                                    | ---                | 1/15              | 1/14             |
| Ammerman <i>et al.</i> 2018, Study 3 | 7.73 (0.18)                                   | 2RHZE/2RH | ---                                                                    | 5/14               | ---               | ---              |
|                                      |                                               | 4RHZE     | ---                                                                    | 6/14               | ---               | ---              |
| <b>TOTAL RELAPSE</b>                 |                                               |           | <b>30/30 (100%)</b>                                                    | <b>23/58 (40%)</b> | <b>4/30 (13%)</b> | <b>2/24 (8%)</b> |

--- indicates not determined.

References:

- Rosenthal IM, Zhang M, Almeida D, Grosset JH, Nuermberger EL. Isoniazid or moxifloxacin in rifapentine-based regimens for experimental tuberculosis? *Am J Respir Crit Care Med.* 2008;178: 989-993. doi: 10.1164/rccm.200807-1029OC.
- Rosenthal IM, Zhang M, Williams KN, Peloquin CA, Tyagi S, Vernon AA, et al. Daily dosing of rifapentine cures tuberculosis in three months or less in the murine model. *PLoS Med.* 2007;4: e344. doi: 10.1371/journal.pmed.0040344.
- Tyagi S, Ammerman NC, Li SY, Adamson J, Converse PJ, Swanson RV, et al. Clofazimine shortens the duration of the first-line treatment regimen for experimental chemotherapy of tuberculosis. *Proc Natl Acad Sci U S A.* 2015;112: 869-874. doi: 10.1073/pnas.1416951112.
- Ammerman NC, Swanson RV, Bautista EM, Almeida DV, Saini V, Omansen TF, et al. Impact of clofazimine dosing on treatment shortening of the first-line regimen in a mouse model of tuberculosis. *Antimicrob Agents Chemother.* 2018;62: e00636-18. doi: 10.1128/AAC.00636-18.

**Table S26. Preparation of drug suspensions/solutions for oral administration to BALB/c and C3HeB/FeJ mice.** Isoniazid, pyrazinamide, and ethambutol were prepared in combination in one solution for administration. R, rifampin; H, isoniazid; Z, pyrazinamide; E, ethambutol; C, clofazimine; P, rifapentine.

| Mouse strain and week of treatment | Average body mass (g) | Drug concentrations ( $\mu\text{g/mL}$ ) to administer the following doses in 0.2 mL |            |             |             |              |            |
|------------------------------------|-----------------------|--------------------------------------------------------------------------------------|------------|-------------|-------------|--------------|------------|
|                                    |                       | R 10 mg/kg                                                                           | H 10 mg/kg | Z 150 mg/kg | E 100 mg/kg | C 12.5 mg/kg | P 20 mg/kg |
| <u>BALB/c mice</u>                 |                       |                                                                                      |            |             |             |              |            |
| Weeks 1-12                         | 20                    | 1.00                                                                                 | 1.00       | 15.00       | 10.00       | 1.25         | 2.00       |
| <u>C3HeB/FeJ mice</u>              |                       |                                                                                      |            |             |             |              |            |
| Week 1                             | 25                    | 1.25                                                                                 | 1.25       | 18.74       | 12.51       | 1.56         | 2.50       |
| Week 2                             | 26.3                  | 1.32                                                                                 | 1.32       | 19.73       | 13.15       | 1.63         | 2.63       |
| Week 5                             | 27.8                  | 1.39                                                                                 | 1.39       | 20.85       | 13.90       | 1.74         | 2.78       |
| Week 10                            | 32.2                  | 1.61                                                                                 | 1.61       | 24.17       | 16.10       | 2.01         | 3.22       |

Table S26
